# Supplementary material for: What Works to Improve Contraceptive Outcomes Among Adolescents and Young Adults in LMICs: A Rapid Evidence Assessment and Synthesis by Intervention Strategy
Source: Research Square preprint supplement (doi:10.21203/rs.3.rs-8716367/v1), 2026-02-16
Supplement: Supplementary file 1 [file a66c4af64b35be9cefcdcff1.xlsx]

## Sheet: Sheet1
Supplement 4. Full Extraction Table
Overview						Population							Study Design											Intervention									Results
Study ID (Author, Year)	Title	Year	Journal	Country	Research Question	Population Description	Age Range(s)	Marital Status	Gender	Urbanacity	Region	Setting	Study Design	Strength of Design	Data Type	Data Source	Longitudinal (Y/N)	Comparison Group Present (Y/N)	Sample Size (Total)	Sample Size (Total AYA)	Sample Size (Per Arm)	Attrition Rate (%)	Statistical Methods	Intervention Name	Intervention Description	Intervention Design/Adaptation	Delivery Mode	Implementing Actors	Duration/Frequency	Delivery Setting	HIP Strategy Category	Intervention Strategy Tags	Outcome Domain	Outcome Name	Outcome Type	Timepoint of Outcome Measurement	Outcome Unit	Effect Measure	Exposure	Mediator	Timepoint of Mediator Measurement	Main Effect Estimate	Main Effect Confidence Interval or SE	Main Effect P-value	Statistical Significance (Y/N)	Direction of Effect (↑ ↓ Null)	Mediating Effect Estimate	Mediating Confidence Interval or SE	Mediating P-value
Ahmed et al. (2020)	Association Between Exposure to Mass Media Family Planning Messages and Utilization of Modern Contraceptive Among Urban and Rural Youth Women in Ethiopia	2020	International Journal of Women’s Health	Ethiopia	Is exposure to mass media FP messages associated with modern contraceptive use among youth women, and does this vary in urban vs rural settings?	Young women aged 15 to 24 years old residing in rural and urban areas of Ethiopia	15-24 years	Marority unmarried	Female	Urban, Rural	Multiple regions	General population	Cross-sectional	Weak	Quantitative	2016 Ethiopia Demographic & Health Survey	No	Yes	6401	6401	2,340 urban; 4,061 rural	N/A	Multivariate logistic regression, controlling for confounders.	N/A	Exposure via radio, TV, print, or mobile	N/A	Radio, TV, print, or mobile	N/A	Any vs. none	Individual/household	Social behavior change	Mass media	Contraceptive uptake/use	Current use of modern contraceptive	Binary	N/A	Individual	OR / AOR	Mass media FP messages: Urban	N/A	N/A	0.38	0.21–0.68	Not reported	Significant (p<.05)	Negative	N/A	N/A	N/A
Ahmed et al. (2020)	Association Between Exposure to Mass Media Family Planning Messages and Utilization of Modern Contraceptive Among Urban and Rural Youth Women in Ethiopia	2020	International Journal of Women’s Health	Ethiopia	Is exposure to mass media FP messages associated with modern contraceptive use among youth women, and does this vary in urban vs rural settings?	Young women aged 15 to 24 years old residing in rural and urban areas of Ethiopia	15-24 years	Marority unmarried	Female	Urban, Rural	Multiple regions	General population	Cross-sectional	Weak	Quantitative	2016 Ethiopia Demographic & Health Survey	No	Yes	6401	6401	(2,340 urban; 4,061 rural)	N/A	Multivariate logistic regression, controlling for confounders.	N/A	Exposure via radio, TV, print, or mobile	N/A	Radio, TV, print, or mobile	N/A	Any vs. none	Individual/household	Social behavior change	Mass media	Contraceptive uptake/use	Current use of modern contraceptive	Binary	N/A	Individual	OR / AOR	Mass media FP messages: Rural	N/A	N/A	1.2	0.85–1.70	Not reported	Null (p>.1)	Null	N/A	N/A	N/A
Alekhya et al. (2023)	Effectiveness of school-based sexual and reproductive health education among adolescent girls in Urban areas of Odisha, India: a cluster randomized trial	2023	Reproductive Health	India	Does a school-based SRH education intervention improve knowledge and contraceptive attitudes/use among adolescent girls in Odisha?	Adolescent girls enrolled in 9th–12th grades in government schools in Bhubaneswar	14-15 years	Unmarried	Female	Urban	Bhubaneswar	School	Cluster randomized controlled trial (RCT)	Strong	Quantitative	Primary data via structured questionnaires	Yes	Yes	600	600	300 intervention, 300 control	0.13	Descriptive statistics for socio-demographic details; Chi-square test for proportional changes in KAP before and after the intervention.	N/A	Three education sessions on SRH topics including female reproductive system, puberty, pregnancy, contraception, menstruation, and STI prevention, and an interactive session to clear misconceptions.	Based on WHO and national adolescent health guidelines, adapted to local context through desk/lit review by study team, reviewed by medical social workers	In-person, teacher-led group sessions	Trained school teachers	Three 2-hour sessions delivered on consecutive days	Schools	Social behavior change	School-based education	Knowledge	Awareness of contraceptive methods	Binary	Baseline, 3-month follow-up	Individual	Mean diff (int vs. control)	Allocated to intervention school receiving school-based SRH education intervention	N/A	N/A	Baseline: intervention yes - 62 (13.2) / no - 407 (89.1); control yes - 42 (13.1) / no - 279 (86.9) Endline: intervention yes - 337 (87.1) / no - 50 (12.9); control yes - 22 (7.2) / no - 282 (92.8)	Not reported	Baseline 0.58; endline <.01	Significant (p<.05)	Positive	N/A	N/A	N/A
Arinze-Onyia et al. (2014)	Health education alone and health education plus advance provision of emergency contraceptive pills on knowledge and attitudes among university female students in Enugu, Nigeria	2014	Nigerian Journal of Clinical Practice	Nigeria	Does adding advance provision of EC pills to health education improve knowledge and attitudes toward EC compared to health education alone?	Female students (non-medical) attending University of Nigeria, Enugu Campus	18–26 years	Marority unmarried	Female	Urban	Southeast Nigeria	School	Randomized controlled trial (RCT)	Strong	Quantitative	Primary data via self-administered questionnaires	Yes	Yes	290	290	140 intervention; 150 control	0	Chi-square tests	N/A	Three health education sessions plus provision of EC pills (Postinor) vs health education alone	Not reported	In-person, group education sessions	Not reported	Three education sessions on Saturdays for three weeks, length not reported, one pack of EC	Schools	Supply & service delivery	Supply	Knowledge	Knowledge score	Continuous	Baseline and 3-month post-intervention	Individual	Mean diff (int vs. control)	Allocated to intervention receiving education plus EC provision compared to education alone	N/A	N/A	Baseline: intervention - 540 (16.8); control - 583 (16.9) Endline: intervention - 1979 (61.5); control - 1199 (34.8)	Not reported	Baseline 0.89; endline <.001	Significant (p<.05)	Positive	N/A	N/A	N/A
Bajoga et al. (2015)	Media Influence on Sexual Activity and Contraceptive Use: A Cross-Sectional Survey among Young Women in Urban Nigeria	2015	African Journal of Reproductive Health	Nigeria	Is recent media exposure to FP messages associated with modern contraceptive use and sexual experience among young women in six urban cities in Nigeria?	Women aged 15–24 in six urban cities in Nigeria	15-24 years	Marority unmarried	Female	Urban	Abuja, Benin City, Ibadan, Ilorin, Kaduna, Zaria	General population	Cross-sectional	Weak	Quantitative	NURHI 2010 baseline survey	No	Yes	5765	5765	N/A	N/A	Descriptive statistics, multivariable logistic regression.	N/A	Self-reported recent exposure to FP messages via newspaper, radio, television, mobile phone	N/A	Radio, TV, mobile phone, newspaper	N/A	Any vs. none	Individual/household	Social behavior change	Mass media	Contraceptive uptake/use	Current use of modern contraceptive	Categorical	N/A	Individual	OR / AOR	Mass media FP messages via newspaper: Total	N/A	N/A	1.2	0.8 – 1.8	Not reported	Null (p>.1)	Null	N/A	N/A	N/A
Bajoga et al. (2015)	Media Influence on Sexual Activity and Contraceptive Use: A Cross-Sectional Survey among Young Women in Urban Nigeria	2015	African Journal of Reproductive Health	Nigeria	Is recent media exposure to FP messages associated with modern contraceptive use and sexual experience among young women in six urban cities in Nigeria?	Women aged 15–24 in six urban cities in Nigeria	15-24 years	Marority unmarried	Female	Urban	Abuja, Benin City, Ibadan, Ilorin, Kaduna, Zaria	General population	Cross-sectional	Weak	Quantitative	NURHI 2010 baseline survey	No	Yes	5765	5765	N/A	N/A	Descriptive statistics, multivariable logistic regression.	N/A	Self-reported recent exposure to FP messages via newspaper, radio, television, mobile phone	N/A	Radio, TV, mobile phone, newspaper	N/A	Any vs. none	Individual/household	Social behavior change	Mass media	Contraceptive uptake/use	Current use of modern contraceptive	Categorical	N/A	Individual	OR / AOR	Mass media FP messages via newspaper: Abuja	N/A	N/A	0.4	0.1 – 1.0	Not reported	Null (p>.1)	Null	N/A	N/A	N/A
Bajoga et al. (2015)	Media Influence on Sexual Activity and Contraceptive Use: A Cross-Sectional Survey among Young Women in Urban Nigeria	2015	African Journal of Reproductive Health	Nigeria	Is recent media exposure to FP messages associated with modern contraceptive use and sexual experience among young women in six urban cities in Nigeria?	Women aged 15–24 in six urban cities in Nigeria	15-24 years	Marority unmarried	Female	Urban	Abuja, Benin City, Ibadan, Ilorin, Kaduna, Zaria	General population	Cross-sectional	Weak	Quantitative	NURHI 2010 baseline survey	No	Yes	5765	5765	N/A	N/A	Descriptive statistics, multivariable logistic regression.	N/A	Self-reported recent exposure to FP messages via newspaper, radio, television, mobile phone	N/A	Radio, TV, mobile phone, newspaper	N/A	Any vs. none	Individual/household	Social behavior change	Mass media	Contraceptive uptake/use	Current use of modern contraceptive	Categorical	N/A	Individual	OR / AOR	Mass media FP messages via newspaper: Benin	N/A	N/A	1.6	0.8 – 3.2	Not reported	Null (p>.1)	Null	N/A	N/A	N/A
Bajoga et al. (2015)	Media Influence on Sexual Activity and Contraceptive Use: A Cross-Sectional Survey among Young Women in Urban Nigeria	2015	African Journal of Reproductive Health	Nigeria	Is recent media exposure to FP messages associated with modern contraceptive use and sexual experience among young women in six urban cities in Nigeria?	Women aged 15–24 in six urban cities in Nigeria	15-24 years	Marority unmarried	Female	Urban	Abuja, Benin City, Ibadan, Ilorin, Kaduna, Zaria	General population	Cross-sectional	Weak	Quantitative	NURHI 2010 baseline survey	No	Yes	5765	5765	N/A	N/A	Descriptive statistics, multivariable logistic regression.	N/A	Self-reported recent exposure to FP messages via newspaper, radio, television, mobile phone	N/A	Radio, TV, mobile phone, newspaper	N/A	Any vs. none	Individual/household	Social behavior change	Mass media	Contraceptive uptake/use	Current use of modern contraceptive	Categorical	N/A	Individual	OR / AOR	Mass media FP messages via newspaper: Ibadan	N/A	N/A	2.5	0.6 – 10.0	Not reported	Null (p>.1)	Null	N/A	N/A	N/A
Bajoga et al. (2015)	Media Influence on Sexual Activity and Contraceptive Use: A Cross-Sectional Survey among Young Women in Urban Nigeria	2015	African Journal of Reproductive Health	Nigeria	Is recent media exposure to FP messages associated with modern contraceptive use and sexual experience among young women in six urban cities in Nigeria?	Women aged 15–24 in six urban cities in Nigeria	15-24 years	Marority unmarried	Female	Urban	Abuja, Benin City, Ibadan, Ilorin, Kaduna, Zaria	General population	Cross-sectional	Weak	Quantitative	NURHI 2010 baseline survey	No	Yes	5765	5765	N/A	N/A	Descriptive statistics, multivariable logistic regression.	N/A	Self-reported recent exposure to FP messages via newspaper, radio, television, mobile phone	N/A	Radio, TV, mobile phone, newspaper	N/A	Any vs. none	Individual/household	Social behavior change	Mass media	Contraceptive uptake/use	Current use of modern contraceptive	Categorical	N/A	Individual	OR / AOR	Mass media FP messages via newspaper: Ilorin	N/A	N/A	1.1	0.4 – 3.5	Not reported	Null (p>.1)	Null	N/A	N/A	N/A
Bajoga et al. (2015)	Media Influence on Sexual Activity and Contraceptive Use: A Cross-Sectional Survey among Young Women in Urban Nigeria	2015	African Journal of Reproductive Health	Nigeria	Is recent media exposure to FP messages associated with modern contraceptive use and sexual experience among young women in six urban cities in Nigeria?	Women aged 15–24 in six urban cities in Nigeria	15-24 years	Marority unmarried	Female	Urban	Abuja, Benin City, Ibadan, Ilorin, Kaduna, Zaria	General population	Cross-sectional	Weak	Quantitative	NURHI 2010 baseline survey	No	Yes	5765	5765	N/A	N/A	Descriptive statistics, multivariable logistic regression.	N/A	Self-reported recent exposure to FP messages via newspaper, radio, television, mobile phone	N/A	Radio, TV, mobile phone, newspaper	N/A	Any vs. none	Individual/household	Social behavior change	Mass media	Contraceptive uptake/use	Current use of modern contraceptive	Categorical	N/A	Individual	OR / AOR	Mass media FP messages via newspaper: Kaduna	N/A	N/A	0.4	0.1 – 1.9	Not reported	Null (p>.1)	Null	N/A	N/A	N/A
Bajoga et al. (2015)	Media Influence on Sexual Activity and Contraceptive Use: A Cross-Sectional Survey among Young Women in Urban Nigeria	2015	African Journal of Reproductive Health	Nigeria	Is recent media exposure to FP messages associated with modern contraceptive use and sexual experience among young women in six urban cities in Nigeria?	Women aged 15–24 in six urban cities in Nigeria	15-24 years	Marority unmarried	Female	Urban	Abuja, Benin City, Ibadan, Ilorin, Kaduna, Zaria	General population	Cross-sectional	Weak	Quantitative	NURHI 2010 baseline survey	No	Yes	5765	5765	N/A	N/A	Descriptive statistics, multivariable logistic regression.	N/A	Self-reported recent exposure to FP messages via newspaper, radio, television, mobile phone	N/A	Radio, TV, mobile phone, newspaper	N/A	Any vs. none	Individual/household	Social behavior change	Mass media	Contraceptive uptake/use	Current use of modern contraceptive	Categorical	N/A	Individual	OR / AOR	Mass media FP messages via newspaper: Zaria	N/A	N/A	1.7	0.2 – 12.0	Not reported	Null (p>.1)	Null	N/A	N/A	N/A
Bajoga et al. (2015)	Media Influence on Sexual Activity and Contraceptive Use: A Cross-Sectional Survey among Young Women in Urban Nigeria	2015	African Journal of Reproductive Health	Nigeria	Is recent media exposure to FP messages associated with modern contraceptive use and sexual experience among young women in six urban cities in Nigeria?	Women aged 15–24 in six urban cities in Nigeria	15-24 years	Marority unmarried	Female	Urban	Abuja, Benin City, Ibadan, Ilorin, Kaduna, Zaria	General population	Cross-sectional	Weak	Quantitative	NURHI 2010 baseline survey	No	Yes	5765	5765	N/A	N/A	Descriptive statistics, multivariable logistic regression.	N/A	Self-reported recent exposure to FP messages via newspaper, radio, television, mobile phone	N/A	Radio, TV, mobile phone, newspaper	N/A	Any vs. none	Individual/household	Social behavior change	Mass media	Contraceptive uptake/use	Current use of modern contraceptive	Categorical	N/A	Individual	OR / AOR	Mass media FP messages via Radio: Total	N/A	N/A	1.3	0.8 – 2.1	Not reported	Null (p>.1)	Null	N/A	N/A	N/A
Bajoga et al. (2015)	Media Influence on Sexual Activity and Contraceptive Use: A Cross-Sectional Survey among Young Women in Urban Nigeria	2015	African Journal of Reproductive Health	Nigeria	Is recent media exposure to FP messages associated with modern contraceptive use and sexual experience among young women in six urban cities in Nigeria?	Women aged 15–24 in six urban cities in Nigeria	15-24 years	Marority unmarried	Female	Urban	Abuja, Benin City, Ibadan, Ilorin, Kaduna, Zaria	General population	Cross-sectional	Weak	Quantitative	NURHI 2010 baseline survey	No	Yes	5765	5765	N/A	N/A	Descriptive statistics, multivariable logistic regression.	N/A	Self-reported recent exposure to FP messages via newspaper, radio, television, mobile phone	N/A	Radio, TV, mobile phone, newspaper	N/A	Any vs. none	Individual/household	Social behavior change	Mass media	Contraceptive uptake/use	Current use of modern contraceptive	Categorical	N/A	Individual	OR / AOR	Mass media FP messages via radio: Abuja	N/A	N/A	2.2	0.5 – 9.3	Not reported	Null (p>.1)	Null	N/A	N/A	N/A
Bajoga et al. (2015)	Media Influence on Sexual Activity and Contraceptive Use: A Cross-Sectional Survey among Young Women in Urban Nigeria	2015	African Journal of Reproductive Health	Nigeria	Is recent media exposure to FP messages associated with modern contraceptive use and sexual experience among young women in six urban cities in Nigeria?	Women aged 15–24 in six urban cities in Nigeria	15-24 years	Marority unmarried	Female	Urban	Abuja, Benin City, Ibadan, Ilorin, Kaduna, Zaria	General population	Cross-sectional	Weak	Quantitative	NURHI 2010 baseline survey	No	Yes	5765	5765	N/A	N/A	Descriptive statistics, multivariable logistic regression.	N/A	Self-reported recent exposure to FP messages via newspaper, radio, television, mobile phone	N/A	Radio, TV, mobile phone, newspaper	N/A	Any vs. none	Individual/household	Social behavior change	Mass media	Contraceptive uptake/use	Current use of modern contraceptive	Categorical	N/A	Individual	OR / AOR	Mass media FP messages via radio: Benin	N/A	N/A	0.9	0.5 – 1.7	Not reported	Null (p>.1)	Null	N/A	N/A	N/A
Bajoga et al. (2015)	Media Influence on Sexual Activity and Contraceptive Use: A Cross-Sectional Survey among Young Women in Urban Nigeria	2015	African Journal of Reproductive Health	Nigeria	Is recent media exposure to FP messages associated with modern contraceptive use and sexual experience among young women in six urban cities in Nigeria?	Women aged 15–24 in six urban cities in Nigeria	15-24 years	Marority unmarried	Female	Urban	Abuja, Benin City, Ibadan, Ilorin, Kaduna, Zaria	General population	Cross-sectional	Weak	Quantitative	NURHI 2010 baseline survey	No	Yes	5765	5765	N/A	N/A	Descriptive statistics, multivariable logistic regression.	N/A	Self-reported recent exposure to FP messages via newspaper, radio, television, mobile phone	N/A	Radio, TV, mobile phone, newspaper	N/A	Any vs. none	Individual/household	Social behavior change	Mass media	Contraceptive uptake/use	Current use of modern contraceptive	Categorical	N/A	Individual	OR / AOR	Mass media FP messages via radio: Ibadan	N/A	N/A	6.9	1.9 – 23.6	<.01	Significant (p<.05)	Positive	N/A	N/A	N/A
Bajoga et al. (2015)	Media Influence on Sexual Activity and Contraceptive Use: A Cross-Sectional Survey among Young Women in Urban Nigeria	2015	African Journal of Reproductive Health	Nigeria	Is recent media exposure to FP messages associated with modern contraceptive use and sexual experience among young women in six urban cities in Nigeria?	Women aged 15–24 in six urban cities in Nigeria	15-24 years	Marority unmarried	Female	Urban	Abuja, Benin City, Ibadan, Ilorin, Kaduna, Zaria	General population	Cross-sectional	Weak	Quantitative	NURHI 2010 baseline survey	No	Yes	5765	5765	N/A	N/A	Descriptive statistics, multivariable logistic regression.	N/A	Self-reported recent exposure to FP messages via newspaper, radio, television, mobile phone	N/A	Radio, TV, mobile phone, newspaper	N/A	Any vs. none	Individual/household	Social behavior change	Mass media	Contraceptive uptake/use	Current use of modern contraceptive	Categorical	N/A	Individual	OR / AOR	Mass media FP messages via radio: Ilorin	N/A	N/A	0.2	0.1 – 0.6	<.01	Significant (p<.05)	Negative	N/A	N/A	N/A
Bajoga et al. (2015)	Media Influence on Sexual Activity and Contraceptive Use: A Cross-Sectional Survey among Young Women in Urban Nigeria	2015	African Journal of Reproductive Health	Nigeria	Is recent media exposure to FP messages associated with modern contraceptive use and sexual experience among young women in six urban cities in Nigeria?	Women aged 15–24 in six urban cities in Nigeria	15-24 years	Marority unmarried	Female	Urban	Abuja, Benin City, Ibadan, Ilorin, Kaduna, Zaria	General population	Cross-sectional	Weak	Quantitative	NURHI 2010 baseline survey	No	Yes	5765	5765	N/A	N/A	Descriptive statistics, multivariable logistic regression.	N/A	Self-reported recent exposure to FP messages via newspaper, radio, television, mobile phone	N/A	Radio, TV, mobile phone, newspaper	N/A	Any vs. none	Individual/household	Social behavior change	Mass media	Contraceptive uptake/use	Current use of modern contraceptive	Categorical	N/A	Individual	OR / AOR	Mass media FP messages via radio: Kaduna	N/A	N/A	4.6	1.6 – 12.8	<.01	Significant (p<.05)	Positive	N/A	N/A	N/A
Bajoga et al. (2015)	Media Influence on Sexual Activity and Contraceptive Use: A Cross-Sectional Survey among Young Women in Urban Nigeria	2015	African Journal of Reproductive Health	Nigeria	Is recent media exposure to FP messages associated with modern contraceptive use and sexual experience among young women in six urban cities in Nigeria?	Women aged 15–24 in six urban cities in Nigeria	15-24 years	Marority unmarried	Female	Urban	Abuja, Benin City, Ibadan, Ilorin, Kaduna, Zaria	General population	Cross-sectional	Weak	Quantitative	NURHI 2010 baseline survey	No	Yes	5765	5765	N/A	N/A	Descriptive statistics, multivariable logistic regression.	N/A	Self-reported recent exposure to FP messages via newspaper, radio, television, mobile phone	N/A	Radio, TV, mobile phone, newspaper	N/A	Any vs. none	Individual/household	Social behavior change	Mass media	Contraceptive uptake/use	Current use of modern contraceptive	Categorical	N/A	Individual	OR / AOR	Mass media FP messages via radio: Zaria	N/A	N/A	4.6	0.3 – 66.4	Not reported	Null (p>.1)	Null	N/A	N/A	N/A
Bajoga et al. (2015)	Media Influence on Sexual Activity and Contraceptive Use: A Cross-Sectional Survey among Young Women in Urban Nigeria	2015	African Journal of Reproductive Health	Nigeria	Is recent media exposure to FP messages associated with modern contraceptive use and sexual experience among young women in six urban cities in Nigeria?	Women aged 15–24 in six urban cities in Nigeria	15-24 years	Marority unmarried	Female	Urban	Abuja, Benin City, Ibadan, Ilorin, Kaduna, Zaria	General population	Cross-sectional	Weak	Quantitative	NURHI 2010 baseline survey	No	Yes	5765	5765	N/A	N/A	Descriptive statistics, multivariable logistic regression.	N/A	Self-reported recent exposure to FP messages via newspaper, radio, television, mobile phone	N/A	Radio, TV, mobile phone, newspaper	N/A	Any vs. none	Individual/household	Social behavior change	Mass media	Contraceptive uptake/use	Current use of modern contraceptive	Categorical	N/A	Individual	OR / AOR	Mass media FP messages via tv: Total	N/A	N/A	1.6	1.1 – 2.3	<.05	Significant (p<.05)	Positive	N/A	N/A	N/A
Bajoga et al. (2015)	Media Influence on Sexual Activity and Contraceptive Use: A Cross-Sectional Survey among Young Women in Urban Nigeria	2015	African Journal of Reproductive Health	Nigeria	Is recent media exposure to FP messages associated with modern contraceptive use and sexual experience among young women in six urban cities in Nigeria?	Women aged 15–24 in six urban cities in Nigeria	15-24 years	Marority unmarried	Female	Urban	Abuja, Benin City, Ibadan, Ilorin, Kaduna, Zaria	General population	Cross-sectional	Weak	Quantitative	NURHI 2010 baseline survey	No	Yes	5765	5765	N/A	N/A	Descriptive statistics, multivariable logistic regression.	N/A	Self-reported recent exposure to FP messages via newspaper, radio, television, mobile phone	N/A	Radio, TV, mobile phone, newspaper	N/A	Any vs. none	Individual/household	Social behavior change	Mass media	Contraceptive uptake/use	Current use of modern contraceptive	Categorical	N/A	Individual	OR / AOR	Mass media FP messages via tv: Abuja	N/A	N/A	1.7	0.4 – 6.7	Not reported	Null (p>.1)	Null	N/A	N/A	N/A
Bajoga et al. (2015)	Media Influence on Sexual Activity and Contraceptive Use: A Cross-Sectional Survey among Young Women in Urban Nigeria	2015	African Journal of Reproductive Health	Nigeria	Is recent media exposure to FP messages associated with modern contraceptive use and sexual experience among young women in six urban cities in Nigeria?	Women aged 15–24 in six urban cities in Nigeria	15-24 years	Marority unmarried	Female	Urban	Abuja, Benin City, Ibadan, Ilorin, Kaduna, Zaria	General population	Cross-sectional	Weak	Quantitative	NURHI 2010 baseline survey	No	Yes	5765	5765	N/A	N/A	Descriptive statistics, multivariable logistic regression.	N/A	Self-reported recent exposure to FP messages via newspaper, radio, television, mobile phone	N/A	Radio, TV, mobile phone, newspaper	N/A	Any vs. none	Individual/household	Social behavior change	Mass media	Contraceptive uptake/use	Current use of modern contraceptive	Categorical	N/A	Individual	OR / AOR	Mass media FP messages via tv: Benin	N/A	N/A	1.5	0.8 – 2.7	Not reported	Null (p>.1)	Null	N/A	N/A	N/A
Bajoga et al. (2015)	Media Influence on Sexual Activity and Contraceptive Use: A Cross-Sectional Survey among Young Women in Urban Nigeria	2015	African Journal of Reproductive Health	Nigeria	Is recent media exposure to FP messages associated with modern contraceptive use and sexual experience among young women in six urban cities in Nigeria?	Women aged 15–24 in six urban cities in Nigeria	15-24 years	Marority unmarried	Female	Urban	Abuja, Benin City, Ibadan, Ilorin, Kaduna, Zaria	General population	Cross-sectional	Weak	Quantitative	NURHI 2010 baseline survey	No	Yes	5765	5765	N/A	N/A	Descriptive statistics, multivariable logistic regression.	N/A	Self-reported recent exposure to FP messages via newspaper, radio, television, mobile phone	N/A	Radio, TV, mobile phone, newspaper	N/A	Any vs. none	Individual/household	Social behavior change	Mass media	Contraceptive uptake/use	Current use of modern contraceptive	Categorical	N/A	Individual	OR / AOR	Mass media FP messages via tv: Ibadan	N/A	N/A	0.7	0.3 – 1.7	Not reported	Null (p>.1)	Null	N/A	N/A	N/A
Bajoga et al. (2015)	Media Influence on Sexual Activity and Contraceptive Use: A Cross-Sectional Survey among Young Women in Urban Nigeria	2015	African Journal of Reproductive Health	Nigeria	Is recent media exposure to FP messages associated with modern contraceptive use and sexual experience among young women in six urban cities in Nigeria?	Women aged 15–24 in six urban cities in Nigeria	15-24 years	Marority unmarried	Female	Urban	Abuja, Benin City, Ibadan, Ilorin, Kaduna, Zaria	General population	Cross-sectional	Weak	Quantitative	NURHI 2010 baseline survey	No	Yes	5765	5765	N/A	N/A	Descriptive statistics, multivariable logistic regression.	N/A	Self-reported recent exposure to FP messages via newspaper, radio, television, mobile phone	N/A	Radio, TV, mobile phone, newspaper	N/A	Any vs. none	Individual/household	Social behavior change	Mass media	Contraceptive uptake/use	Current use of modern contraceptive	Categorical	N/A	Individual	OR / AOR	Mass media FP messages via tv: Ilorin	N/A	N/A	3	1.1 – 8.8	<.05	Significant (p<.05)	Positive	N/A	N/A	N/A
Bajoga et al. (2015)	Media Influence on Sexual Activity and Contraceptive Use: A Cross-Sectional Survey among Young Women in Urban Nigeria	2015	African Journal of Reproductive Health	Nigeria	Is recent media exposure to FP messages associated with modern contraceptive use and sexual experience among young women in six urban cities in Nigeria?	Women aged 15–24 in six urban cities in Nigeria	15-24 years	Marority unmarried	Female	Urban	Abuja, Benin City, Ibadan, Ilorin, Kaduna, Zaria	General population	Cross-sectional	Weak	Quantitative	NURHI 2010 baseline survey	No	Yes	5765	5765	N/A	N/A	Descriptive statistics, multivariable logistic regression.	N/A	Self-reported recent exposure to FP messages via newspaper, radio, television, mobile phone	N/A	Radio, TV, mobile phone, newspaper	N/A	Any vs. none	Individual/household	Social behavior change	Mass media	Contraceptive uptake/use	Current use of modern contraceptive	Categorical	N/A	Individual	OR / AOR	Mass media FP messages via tv: Kaduna	N/A	N/A	1	0.4 – 2.4	Not reported	Null (p>.1)	Null	N/A	N/A	N/A
Bajoga et al. (2015)	Media Influence on Sexual Activity and Contraceptive Use: A Cross-Sectional Survey among Young Women in Urban Nigeria	2015	African Journal of Reproductive Health	Nigeria	Is recent media exposure to FP messages associated with modern contraceptive use and sexual experience among young women in six urban cities in Nigeria?	Women aged 15–24 in six urban cities in Nigeria	15-24 years	Marority unmarried	Female	Urban	Abuja, Benin City, Ibadan, Ilorin, Kaduna, Zaria	General population	Cross-sectional	Weak	Quantitative	NURHI 2010 baseline survey	No	Yes	5765	5765	N/A	N/A	Descriptive statistics, multivariable logistic regression.	N/A	Self-reported recent exposure to FP messages via newspaper, radio, television, mobile phone	N/A	Radio, TV, mobile phone, newspaper	N/A	Any vs. none	Individual/household	Social behavior change	Mass media	Contraceptive uptake/use	Current use of modern contraceptive	Categorical	N/A	Individual	OR / AOR	Mass media FP messages via tv: Zaria	N/A	N/A	1.6	0.4 – 6.5	Not reported	Null (p>.1)	Null	N/A	N/A	N/A
Bajoga et al. (2015)	Media Influence on Sexual Activity and Contraceptive Use: A Cross-Sectional Survey among Young Women in Urban Nigeria	2015	African Journal of Reproductive Health	Nigeria	Is recent media exposure to FP messages associated with modern contraceptive use and sexual experience among young women in six urban cities in Nigeria?	Women aged 15–24 in six urban cities in Nigeria	15-24 years	Marority unmarried	Female	Urban	Abuja, Benin City, Ibadan, Ilorin, Kaduna, Zaria	General population	Cross-sectional	Weak	Quantitative	NURHI 2010 baseline survey	No	Yes	5765	5765	N/A	N/A	Descriptive statistics, multivariable logistic regression.	N/A	Self-reported recent exposure to FP messages via newspaper, radio, television, mobile phone	N/A	Radio, TV, mobile phone, newspaper	N/A	Any vs. none	Individual/household	Social behavior change	Mass media	Contraceptive uptake/use	Current use of modern contraceptive	Categorical	N/A	Individual	OR / AOR	Mass media FP messages via mobile: Total	N/A	N/A	1.9	1.2 – 2.9	<.01	Significant (p<.05)	Positive	N/A	N/A	N/A
Bajoga et al. (2015)	Media Influence on Sexual Activity and Contraceptive Use: A Cross-Sectional Survey among Young Women in Urban Nigeria	2015	African Journal of Reproductive Health	Nigeria	Is recent media exposure to FP messages associated with modern contraceptive use and sexual experience among young women in six urban cities in Nigeria?	Women aged 15–24 in six urban cities in Nigeria	15-24 years	Marority unmarried	Female	Urban	Abuja, Benin City, Ibadan, Ilorin, Kaduna, Zaria	General population	Cross-sectional	Weak	Quantitative	NURHI 2010 baseline survey	No	Yes	5765	5765	N/A	N/A	Descriptive statistics, multivariable logistic regression.	N/A	Self-reported recent exposure to FP messages via newspaper, radio, television, mobile phone	N/A	Radio, TV, mobile phone, newspaper	N/A	Any vs. none	Individual/household	Social behavior change	Mass media	Contraceptive uptake/use	Current use of modern contraceptive	Categorical	N/A	Individual	OR / AOR	Mass media FP messages via mobile: Abuja	N/A	N/A	1.4	0.2 – 7.8	Not reported	Null (p>.1)	Null	N/A	N/A	N/A
Bajoga et al. (2015)	Media Influence on Sexual Activity and Contraceptive Use: A Cross-Sectional Survey among Young Women in Urban Nigeria	2015	African Journal of Reproductive Health	Nigeria	Is recent media exposure to FP messages associated with modern contraceptive use and sexual experience among young women in six urban cities in Nigeria?	Women aged 15–24 in six urban cities in Nigeria	15-24 years	Marority unmarried	Female	Urban	Abuja, Benin City, Ibadan, Ilorin, Kaduna, Zaria	General population	Cross-sectional	Weak	Quantitative	NURHI 2010 baseline survey	No	Yes	5765	5765	N/A	N/A	Descriptive statistics, multivariable logistic regression.	N/A	Self-reported recent exposure to FP messages via newspaper, radio, television, mobile phone	N/A	Radio, TV, mobile phone, newspaper	N/A	Any vs. none	Individual/household	Social behavior change	Mass media	Contraceptive uptake/use	Current use of modern contraceptive	Categorical	N/A	Individual	OR / AOR	Mass media FP messages via mobile: Benin	N/A	N/A	1.4	0.3 – 7.5	Not reported	Null (p>.1)	Null	N/A	N/A	N/A
Bajoga et al. (2015)	Media Influence on Sexual Activity and Contraceptive Use: A Cross-Sectional Survey among Young Women in Urban Nigeria	2015	African Journal of Reproductive Health	Nigeria	Is recent media exposure to FP messages associated with modern contraceptive use and sexual experience among young women in six urban cities in Nigeria?	Women aged 15–24 in six urban cities in Nigeria	15-24 years	Marority unmarried	Female	Urban	Abuja, Benin City, Ibadan, Ilorin, Kaduna, Zaria	General population	Cross-sectional	Weak	Quantitative	NURHI 2010 baseline survey	No	Yes	5765	5765	N/A	N/A	Descriptive statistics, multivariable logistic regression.	N/A	Self-reported recent exposure to FP messages via newspaper, radio, television, mobile phone	N/A	Radio, TV, mobile phone, newspaper	N/A	Any vs. none	Individual/household	Social behavior change	Mass media	Contraceptive uptake/use	Current use of modern contraceptive	Categorical	N/A	Individual	OR / AOR	Mass media FP messages via mobile: Ibadan	N/A	N/A	2.8	1.4 – 5.7	Not reported	Null (p>.1)	Null	N/A	N/A	N/A
Bajoga et al. (2015)	Media Influence on Sexual Activity and Contraceptive Use: A Cross-Sectional Survey among Young Women in Urban Nigeria	2015	African Journal of Reproductive Health	Nigeria	Is recent media exposure to FP messages associated with modern contraceptive use and sexual experience among young women in six urban cities in Nigeria?	Women aged 15–24 in six urban cities in Nigeria	15-24 years	Marority unmarried	Female	Urban	Abuja, Benin City, Ibadan, Ilorin, Kaduna, Zaria	General population	Cross-sectional	Weak	Quantitative	NURHI 2010 baseline survey	No	Yes	5765	5765	N/A	N/A	Descriptive statistics, multivariable logistic regression.	N/A	Self-reported recent exposure to FP messages via newspaper, radio, television, mobile phone	N/A	Radio, TV, mobile phone, newspaper	N/A	Any vs. none	Individual/household	Social behavior change	Mass media	Contraceptive uptake/use	Current use of modern contraceptive	Categorical	N/A	Individual	OR / AOR	Mass media FP messages via mobile: Ilorin	N/A	N/A	1.6	0.7 – 3.7	Not reported	Null (p>.1)	Null	N/A	N/A	N/A
Bajoga et al. (2015)	Media Influence on Sexual Activity and Contraceptive Use: A Cross-Sectional Survey among Young Women in Urban Nigeria	2015	African Journal of Reproductive Health	Nigeria	Is recent media exposure to FP messages associated with modern contraceptive use and sexual experience among young women in six urban cities in Nigeria?	Women aged 15–24 in six urban cities in Nigeria	15-24 years	Marority unmarried	Female	Urban	Abuja, Benin City, Ibadan, Ilorin, Kaduna, Zaria	General population	Cross-sectional	Weak	Quantitative	NURHI 2010 baseline survey	No	Yes	5765	5765	N/A	N/A	Descriptive statistics, multivariable logistic regression.	N/A	Self-reported recent exposure to FP messages via newspaper, radio, television, mobile phone	N/A	Radio, TV, mobile phone, newspaper	N/A	Any vs. none	Individual/household	Social behavior change	Mass media	Contraceptive uptake/use	Current use of modern contraceptive	Categorical	N/A	Individual	OR / AOR	Mass media FP messages via mobile: Kaduna	N/A	N/A	1.7	0.7 – 4.2	Not reported	Null (p>.1)	Null	N/A	N/A	N/A
Bajoga et al. (2015)	Media Influence on Sexual Activity and Contraceptive Use: A Cross-Sectional Survey among Young Women in Urban Nigeria	2015	African Journal of Reproductive Health	Nigeria	Is recent media exposure to FP messages associated with modern contraceptive use and sexual experience among young women in six urban cities in Nigeria?	Women aged 15–24 in six urban cities in Nigeria	15-24 years	Marority unmarried	Female	Urban	Abuja, Benin City, Ibadan, Ilorin, Kaduna, Zaria	General population	Cross-sectional	Weak	Quantitative	NURHI 2010 baseline survey	No	Yes	5765	5765	N/A	N/A	Descriptive statistics, multivariable logistic regression.	N/A	Self-reported recent exposure to FP messages via newspaper, radio, television, mobile phone	N/A	Radio, TV, mobile phone, newspaper	N/A	Any vs. none	Individual/household	Social behavior change	Mass media	Contraceptive uptake/use	Current use of modern contraceptive	Categorical	N/A	Individual	OR / AOR	Mass media FP messages via mobile: Zaria	N/A	N/A	2.6	0.2 – 26.3	Not reported	Null (p>.1)	Null	N/A	N/A	N/A
Bakesiima et al. (2021)	Effect of peer counselling on acceptance of modern contraceptives among female refugee adolescents in northern Uganda: A randomised controlled trial	2021	PLOS ONE	Uganda	Does peer counselling improve same-day acceptance of modern contraceptives among female refugee adolescents vs routine counselling?	Female refugee adolescents (15–19 yrs), sexually active, not using contraception, living in Palabek Refugee Settlement	15-19 years	Majority married	Female	Rural	Refugee settlement in Northern Uganda	Humanitarian	Randomized controlled trial (RCT)	Strong	Quantitative	Primary data via structured questionnaires	No	Yes	588	588	n=258 peer counselling; n=258 routine counselling	0.12	Chi-square; modified Poisson regression (PRs with 95% CI)	N/A	Peer adolescents (trained) provided contraceptive counselling using WHO guide & visual aids	Not reported	In-person, 1:1 counseling	3 peer counselors (aged 16, 18, 19); training by a FP clinical specialist in five four-hour sessions	1 session; 15-20 minutes	Individual/refugee settlement	Service delivery	Peer-to-peer	Contraceptive uptake/use	Contraceptive uptake	Binary	Immediately post-counseling	Individual	PR / APR	Exposure to peer counselling	N/A	N/A	1.24	1.0-1.5	0.02	Significant (p<.05)	Positive	N/A	N/A	N/A
Bhushan et al. (2022)	The mediating role of partner communication on contraceptive use among adolescent girls and young women participating in a small-group intervention in Malawi: A longitudinal analysis	2022	Global Public Health	Malawi	Does participation in small-group sessions improve partner communication and increase contraceptive use among AGYW?	AGYW, 15–24 years old, sexually active, in Lilongwe, Malawi	15-24 years	Marority unmarried	Female	Urban	Lilongwe	Health facility	Quasi-experimental (non-randomized comparison group)	Moderate	Quantitative	Primary data via structured questionnaires and session attendance logs	Yes	Yes	358	358	Intervention N=220; Control N=138	0.12	Generalized estimating equations with logit link, binomial distribution, and bootstrapping to estimate mediating indirect effects	Girl Power	12-session program covering SRH, gender norms, partner communication, contraception, financial literacy	Adapted from evidence-based SSA programs; delivered by trained young women facilitators	In-person group sessions	Trained young female facilitators (ages 20–30, post-secondary diplomas)	12 monthly 2-hour sessions	Government health clinics	Social behavior change	Small-group education, Couple communication	Contraceptive uptake/use	Current use of non-barrier modern contraceptive	Binary	12-months follow-up	Individual	OR / AOR	Assigned to receive small-group sessions	Ccommunicated with partner about contraception in past 6 months	6-months follow-up	5.1	2.3-11.3	Not reported	Significant (p<.05)	Positive	0.03	-0.01-0.07	Not reported
Bhushan et al. (2022)	The mediating role of partner communication on contraceptive use among adolescent girls and young women participating in a small-group intervention in Malawi: A longitudinal analysis	2022	Global Public Health	Malawi	Does participation in small-group sessions improve partner communication and increase contraceptive use among AGYW?	AGYW, 15–24 years old, sexually active, in Lilongwe, Malawi	15-24 years	Marority unmarried	Female	Urban	Lilongwe	Health facility	Quasi-experimental (non-randomized comparison group)	Moderate	Quantitative	Primary data via structured questionnaires and session attendance logs	Yes	Yes	358	358	Intervention N=220; Control N=139	1.12	Generalized estimating equations with logit link, binomial distribution, and bootstrapping to estimate mediating indirect effects.	Girl Power	12-session program covering SRH, gender norms, partner communication, contraception, financial literacy	Adapted from evidence-based SSA programs; delivered by trained young women facilitators	In-person group sessions	Trained young female facilitators (ages 20–30, post-secondary diplomas)	13 monthly 2-hour sessions	Government health clinics	Social behavior change	Small-group education, Couple communication	Contraceptive uptake/use	Current use of condom	Binary	12-months follow-up	Individual	OR / AOR	Assigned to receive small-group sessions	Ccommunicated with partner about contraception in past 6 months	6-months follow-up	2.2	1.2-4.1	Not reported	Significant (p<.05)	Positive	0.01	-0.02-0.03	Not reported
Bhushan et al. (2022)	The mediating role of partner communication on contraceptive use among adolescent girls and young women participating in a small-group intervention in Malawi: A longitudinal analysis	2022	Global Public Health	Malawi	Does participation in small-group sessions improve partner communication and increase contraceptive use among AGYW?	AGYW, 15–24 years old, sexually active, in Lilongwe, Malawi	15-24 years	Marority unmarried	Female	Urban	Lilongwe	Health facility	Quasi-experimental (non-randomized comparison group)	Moderate	Quantitative	Primary data via structured questionnaires and session attendance logs	Yes	Yes	358	358	Intervention N=220; Control N=140	2.12	Generalized estimating equations with logit link, binomial distribution, and bootstrapping to estimate mediating indirect effects.	Girl Power	12-session program covering SRH, gender norms, partner communication, contraception, financial literacy	Adapted from evidence-based SSA programs; delivered by trained young women facilitators	In-person group sessions	Trained young female facilitators (ages 20–30, post-secondary diplomas)	14 monthly 2-hour sessions	Government health clinics	Social behavior change	Small-group education, Couple communication	Contraceptive uptake/use	Current use of non-barrier modern contraceptive	Binary	12-months follow-up	Individual	OR / AOR	# of small group sessiosn attended	Ccommunicated with partner about contraception in past 6 months	6-months follow-up	1.1	1.1-1.2	Not reported	Significant (p<.05)	Positive	0.04	-0.00-0.09	Not reported
Bhushan et al. (2022)	The mediating role of partner communication on contraceptive use among adolescent girls and young women participating in a small-group intervention in Malawi: A longitudinal analysis	2022	Global Public Health	Malawi	Does participation in small-group sessions improve partner communication and increase contraceptive use among AGYW?	AGYW, 15–24 years old, sexually active, in Lilongwe, Malawi	15-24 years	Marority unmarried	Female	Urban	Lilongwe	Health facility	Quasi-experimental (non-randomized comparison group)	Moderate	Quantitative	Primary data via structured questionnaires and session attendance logs	Yes	Yes	358	358	Intervention N=220; Control N=141	3.12	Generalized estimating equations with logit link, binomial distribution, and bootstrapping to estimate mediating indirect effects.	Girl Power	12-session program covering SRH, gender norms, partner communication, contraception, financial literacy	Adapted from evidence-based SSA programs; delivered by trained young women facilitators	In-person group sessions	Trained young female facilitators (ages 20–30, post-secondary diplomas)	15 monthly 2-hour sessions	Government health clinics	Social behavior change	Small-group education, Couple communication	Contraceptive uptake/use	Current use of condom	Binary	12-months follow-up	Individual	OR / AOR	# of small group sessiosn attended	Ccommunicated with partner about contraception in past 6 months	6-months follow-up	1.1	1.0-1.2	Not reported	Significant (p<.05)	Positive	0.01	-0.02-0.04	Not reported
Bhushan et al. (2022)	The mediating role of partner communication on contraceptive use among adolescent girls and young women participating in a small-group intervention in Malawi: A longitudinal analysis	2022	Global Public Health	Malawi	Does participation in small-group sessions improve partner communication and increase contraceptive use among AGYW?	AGYW, 15–24 years old, sexually active, in Lilongwe, Malawi	15-24 years	Marority unmarried	Female	Urban	Lilongwe	Health facility	Quasi-experimental (non-randomized comparison group)	Moderate	Quantitative	Primary data via structured questionnaires and session attendance logs	Yes	Yes	358	358	Intervention N=220; Control N=142	4.12	Generalized estimating equations with logit link, binomial distribution, and bootstrapping to estimate mediating indirect effects.	Girl Power	12-session program covering SRH, gender norms, partner communication, contraception, financial literacy	Adapted from evidence-based SSA programs; delivered by trained young women facilitators	In-person group sessions	Trained young female facilitators (ages 20–30, post-secondary diplomas)	16 monthly 2-hour sessions	Government health clinics	Social behavior change	Small-group education, Couple communication	Contraceptive uptake/use	Current use of non-barrier modern contraceptive	Binary	12-months follow-up	Individual	OR / AOR	attended both group sessions on contraceptive use and communication	Ccommunicated with partner about contraception in past 6 months	6-months follow-up	3.5	1.9-6.7	Not reported	Significant (p<.05)	Positive	0.04	0.01-0.07	Not reported
Bhushan et al. (2022)	The mediating role of partner communication on contraceptive use among adolescent girls and young women participating in a small-group intervention in Malawi: A longitudinal analysis	2022	Global Public Health	Malawi	Does participation in small-group sessions improve partner communication and increase contraceptive use among AGYW?	AGYW, 15–24 years old, sexually active, in Lilongwe, Malawi	15-24 years	Marority unmarried	Female	Urban	Lilongwe	Health facility	Quasi-experimental (non-randomized comparison group)	Moderate	Quantitative	Primary data via structured questionnaires and session attendance logs	Yes	Yes	358	358	Intervention N=220; Control N=143	5.12	Generalized estimating equations with logit link, binomial distribution, and bootstrapping to estimate mediating indirect effects.	Girl Power	12-session program covering SRH, gender norms, partner communication, contraception, financial literacy	Adapted from evidence-based SSA programs; delivered by trained young women facilitators	In-person group sessions	Trained young female facilitators (ages 20–30, post-secondary diplomas)	17 monthly 2-hour sessions	Government health clinics	Social behavior change	Small-group education, Couple communication	Contraceptive uptake/use	Current use of condom	Binary	12-months follow-up	Individual	OR / AOR	attended both group sessions on contraceptive use and communication	Ccommunicated with partner about contraception in past 6 months	6-months follow-up	1.6	0.9-3.0	Not reported	Null (p>.1)	Null	0.01	-0.02-0.03	Not reported
Calhoun et al. (2023)	The more, the better: influence of family planning discussions during the maternal, newborn and child health continuum of care on postpartum contraceptive uptake and method type among young women in Ethiopia	2023	Gates Open Research	Ethiopia	Does discussion of FP at different MNCH visits increase postpartum contraceptive use and LARC uptake among AGYW?	Women aged 15–24 who gave birth between 2019–2021 in six regions of Ethiopia	15-24 years	Majority married	Female	Urban, Rural	Addis Ababa, Afar, Amhara, Oromia, SNNPR, Tigray	General population	Prospective cohort	Moderate	Quantitative	PMA Ethiopia panel survey	Yes	Yes	652	652	N/A	0.34	Discrete-time hazard models; multinomial logistic regression	N/A	FP discussion during ANC, facility delivery discharge, PNC (6 weeks), and vaccination visits	N/A	In-person FP counselling during health system contacts	Health professionals, HEWs, facility providers	1 or more discussions across 4 contact points	Health facilities; community outreach	Supply & service delivery	Integrated service delivery, Quality of care improvements	Contraceptive uptake/use	Initiation of contraceptive use	Binary	6 months and 12 months postpartum	Individual	HR / AHR	# of counseling sessions where FP was discussed (0 to 4)	N/A	N/A	1.34	0.07	<.0001	Significant (p<.05)	Positive	N/A	N/A	N/A
Calhoun et al. (2023)	The more, the better: influence of family planning discussions during the maternal, newborn and child health continuum of care on postpartum contraceptive uptake and method type among young women in Ethiopia	2023	Gates Open Research	Ethiopia	Does discussion of FP at different MNCH visits increase postpartum contraceptive use and LARC uptake among AGYW?	Women aged 15–24 who gave birth between 2019–2021 in six regions of Ethiopia	15-24 years	Majority married	Female	Urban, Rural	Addis Ababa, Afar, Amhara, Oromia, SNNPR, Tigray	General population	Prospective cohort	Moderate	Quantitative	PMA Ethiopia panel survey	Yes	Yes	652	652	N/A	1.341	Discrete-time hazard models; multinomial logistic regression	N/A	FP discussion during ANC, facility delivery discharge, PNC (6 weeks), and vaccination visits	N/A	In-person FP counselling during health system contacts	Health professionals, HEWs, facility providers	2 or more discussions across 4 contact points	Health facilities; community outreach	Supply & service delivery	Integrated service delivery, Quality of care improvements	Contraceptive method	Method type: LARC vs. tradition/non-use	Categorical	12 months postpartum	Individual	RRR / ARRR	Method type: LARC vs. tradition/non-use	N/A	N/A	2.25	0.4	<.0001	Significant (p<.05)	Positive	N/A	N/A	N/A
Calhoun et al. (2023)	The more, the better: influence of family planning discussions during the maternal, newborn and child health continuum of care on postpartum contraceptive uptake and method type among young women in Ethiopia	2023	Gates Open Research	Ethiopia	Does discussion of FP at different MNCH visits increase postpartum contraceptive use and LARC uptake among AGYW?	Women aged 15–24 who gave birth between 2019–2021 in six regions of Ethiopia	15-24 years	Majority married	Female	Urban, Rural	Addis Ababa, Afar, Amhara, Oromia, SNNPR, Tigray	General population	Prospective cohort	Moderate	Quantitative	PMA Ethiopia panel survey	Yes	Yes	652	652	N/A	2.341	Discrete-time hazard models; multinomial logistic regression	N/A	FP discussion during ANC, facility delivery discharge, PNC (6 weeks), and vaccination visits	N/A	In-person FP counselling during health system contacts	Health professionals, HEWs, facility providers	3 or more discussions across 4 contact points	Health facilities; community outreach	Supply & service delivery	Integrated service delivery, Quality of care improvements	Contraceptive method	Method type: Short acting vs. tradition/non-use	Categorical	12 months postpartum	Individual	RRR / ARRR	Method type: Short acting vs. tradition/non-use	N/A	N/A	1.47	0.2	<.001	Significant (p<.05)	Positive	N/A	N/A	N/A
Calhoun et al. (2023)	The more, the better: influence of family planning discussions during the maternal, newborn and child health continuum of care on postpartum contraceptive uptake and method type among young women in Ethiopia	2023	Gates Open Research	Ethiopia	Does discussion of FP at different MNCH visits increase postpartum contraceptive use and LARC uptake among AGYW?	Women aged 15–24 who gave birth between 2019–2021 in six regions of Ethiopia	15-24 years	Majority married	Female	Urban, Rural	Addis Ababa, Afar, Amhara, Oromia, SNNPR, Tigray	General population	Prospective cohort	Moderate	Quantitative	PMA Ethiopia panel survey	Yes	Yes	652	652	N/A	3.341	Discrete-time hazard models; multinomial logistic regression	N/A	FP discussion during ANC, facility delivery discharge, PNC (6 weeks), and vaccination visits	N/A	In-person FP counselling during health system contacts	Health professionals, HEWs, facility providers	4 or more discussions across 4 contact points	Health facilities; community outreach	Supply & service delivery	Integrated service delivery, Quality of care improvements	Contraceptive method	Method type: LARC vs. short acting	Categorical	12 months postpartum	Individual	RRR / ARRR	Method type: LARC vs. short acting	N/A	N/A	1.53	0.2	<.0001	Significant (p<.05)	Positive	N/A	N/A	N/A
Erhardt-Ohren et al. (2022)	Sustained impact of community-based interventions on contraceptive use among married adolescent girls in rural Niger: Results from a cluster randomized controlled trial	2022	International Journal of Gynecology and Obstetrics	Niger	Do community-based interventions (home visits, small group discussions, combined) have sustained impact on modern contraceptive and LARC use among married adolescent girls in rural Niger?	Married adolescent girls aged 13–19, rural Niger	13-19 years	Married	Female	Rural	Dosso Region	General population	Cluster randomized controlled trial (RCT)	Strong	Quantitative	Primary data via structured questionnaires	Yes	Yes	404	404	Control = 158, Home visits = 93, Small group = 72, Combined = 81	Not reported	Multilevel mixed effects logistic regression; linear models (absolute % change)	Reaching Married Adolescents (RMA) Project	4 arms: (1) home visits; (2) small group discussions; (3) combined; plus community dialogues; (4) control > assessed small sample which did not receive any intervention between midline and endline - to assess sustained effects in the absense of intervention	Not reported	Home visits, small group discussions, combined intervention, and supplemental community dialogue sessions	Trained community relais and mentors (local)	1.5 years intervention, 1 session/month; 1.5 years post-intervention follow-up	Individual/Community/Group	Social behavior change	Engaging men and boys, Social norms & networks, Couple communication, Extension worker	Contraceptive uptake/use	Current modern contraceptive use	Binary	18-months post-intervention	Individual	OR / AOR	Home visits vs. control	N/A	N/A	4.11	1.42–11.88	0.009	Significant (p<.05)	Positive	N/A	N/A	N/A
Erhardt-Ohren et al. (2022)	Sustained impact of community-based interventions on contraceptive use among married adolescent girls in rural Niger: Results from a cluster randomized controlled trial	2022	International Journal of Gynecology and Obstetrics	Niger	Do community-based interventions (home visits, small group discussions, combined) have sustained impact on modern contraceptive and LARC use among married adolescent girls in rural Niger?	Married adolescent girls aged 13–19, rural Niger	13-19 years	Married	Female	Rural	Dosso Region	General population	Cluster randomized controlled trial (RCT)	Strong	Quantitative	Primary data via structured questionnaires	Yes	Yes	404	404	Control = 158, Home visits = 93, Small group = 72, Combined = 82	Not reported	Multilevel mixed effects logistic regression; linear models (absolute % change)	Reaching Married Adolescents (RMA) Project	5 arms: (1) home visits; (2) small group discussions; (3) combined; plus community dialogues; (4) control > assessed small sample which did not receive any intervention between midline and endline - to assess sustained effects in the absense of intervention	Not reported	Home visits, small group discussions, combined intervention, and supplemental community dialogue sessions	Trained community relais and mentors (local)	1.5 years intervention, 1 session/month; 1.5 years post-intervention follow-up	Individual/Community/Group	Social behavior change	Engaging men and boys, Social norms & networks, Couple communication, Small-group education	Contraceptive uptake/use	Current modern contraceptive use	Binary	18-months post-intervention	Individual	OR / AOR	Small group discussion vs. control	N/A	N/A	7.94	2.96–21.29	<.001	Significant (p<.05)	Positive	N/A	N/A	N/A
Erhardt-Ohren et al. (2022)	Sustained impact of community-based interventions on contraceptive use among married adolescent girls in rural Niger: Results from a cluster randomized controlled trial	2022	International Journal of Gynecology and Obstetrics	Niger	Do community-based interventions (home visits, small group discussions, combined) have sustained impact on modern contraceptive and LARC use among married adolescent girls in rural Niger?	Married adolescent girls aged 13–19, rural Niger	13-19 years	Married	Female	Rural	Dosso Region	General population	Cluster randomized controlled trial (RCT)	Strong	Quantitative	Primary data via structured questionnaires	Yes	Yes	404	404	Control = 158, Home visits = 93, Small group = 72, Combined = 83	Not reported	Multilevel mixed effects logistic regression; linear models (absolute % change)	Reaching Married Adolescents (RMA) Project	6 arms: (1) home visits; (2) small group discussions; (3) combined; plus community dialogues; (4) control > assessed small sample which did not receive any intervention between midline and endline - to assess sustained effects in the absense of intervention	Not reported	Home visits, small group discussions, combined intervention, and supplemental community dialogue sessions	Trained community relais and mentors (local)	1.5 years intervention, 1 session/month; 1.5 years post-intervention follow-up	Individual/Community/Group	Social behavior change	Engaging men and boys, Social norms & networks, Couple communication, Small-group education	Contraceptive uptake/use	Current modern contraceptive use a	Binary	18-months post-intervention	Individual	OR / AOR	Combined intervention vs. control	N/A	N/A	4.53	1.60–12.87	0.005	Significant (p<.05)	Positive	N/A	N/A	N/A
Erhardt-Ohren et al. (2022)	Sustained impact of community-based interventions on contraceptive use among married adolescent girls in rural Niger: Results from a cluster randomized controlled trial	2022	International Journal of Gynecology and Obstetrics	Niger	Do community-based interventions (home visits, small group discussions, combined) have sustained impact on modern contraceptive and LARC use among married adolescent girls in rural Niger?	Married adolescent girls aged 13–19, rural Niger	13-19 years	Married	Female	Rural	Dosso Region	General population	Cluster randomized controlled trial (RCT)	Strong	Quantitative	Primary data via structured questionnaires	Yes	Yes	404	404	Control = 158, Home visits = 93, Small group = 72, Combined = 84	Not reported	Multilevel mixed effects logistic regression; linear models (absolute % change)	Reaching Married Adolescents (RMA) Project	7 arms: (1) home visits; (2) small group discussions; (3) combined; plus community dialogues; (4) control > assessed small sample which did not receive any intervention between midline and endline - to assess sustained effects in the absense of intervention	Not reported	Home visits, small group discussions, combined intervention, and supplemental community dialogue sessions	Trained community relais and mentors (local)	1.5 years intervention, 1 session/month; 1.5 years post-intervention follow-up	Individual/Community/Group	Social behavior change	Engaging men and boys, Social norms & networks, Couple communication	Contraceptive uptake/use	Current LARC use	Binary	18-months post-intervention	Individual	OR / AOR	Home visits vs. control	N/A	N/A	8.09	2.87–22.77	<.001	Significant (p<.05)	Positive	N/A	N/A	N/A
Erhardt-Ohren et al. (2022)	Sustained impact of community-based interventions on contraceptive use among married adolescent girls in rural Niger: Results from a cluster randomized controlled trial	2022	International Journal of Gynecology and Obstetrics	Niger	Do community-based interventions (home visits, small group discussions, combined) have sustained impact on modern contraceptive and LARC use among married adolescent girls in rural Niger?	Married adolescent girls aged 13–19, rural Niger	13-19 years	Married	Female	Rural	Dosso Region	General population	Cluster randomized controlled trial (RCT)	Strong	Quantitative	Primary data via structured questionnaires	Yes	Yes	404	404	Control = 158, Home visits = 93, Small group = 72, Combined = 85	Not reported	Multilevel mixed effects logistic regression; linear models (absolute % change)	Reaching Married Adolescents (RMA) Project	8 arms: (1) home visits; (2) small group discussions; (3) combined; plus community dialogues; (4) control > assessed small sample which did not receive any intervention between midline and endline - to assess sustained effects in the absense of intervention	Not reported	Home visits, small group discussions, combined intervention, and supplemental community dialogue sessions	Trained community relais and mentors (local)	1.5 years intervention, 1 session/month; 1.5 years post-intervention follow-up	Individual/Community/Group	Social behavior change	Engaging men and boys, Social norms & networks, Couple communication, Small-group education	Contraceptive uptake/use	Current LARC use	Binary	18-months post-intervention	Individual	OR / AOR	Small group discussion vs. control	N/A	N/A	1.35	0.49–3.74	0.565	Null (p>.1)	Null	N/A	N/A	N/A
Erhardt-Ohren et al. (2022)	Sustained impact of community-based interventions on contraceptive use among married adolescent girls in rural Niger: Results from a cluster randomized controlled trial	2022	International Journal of Gynecology and Obstetrics	Niger	Do community-based interventions (home visits, small group discussions, combined) have sustained impact on modern contraceptive and LARC use among married adolescent girls in rural Niger?	Married adolescent girls aged 13–19, rural Niger	13-19 years	Married	Female	Rural	Dosso Region	General population	Cluster randomized controlled trial (RCT)	Strong	Quantitative	Primary data via structured questionnaires	Yes	Yes	404	404	Control = 158, Home visits = 93, Small group = 72, Combined = 86	Not reported	Multilevel mixed effects logistic regression; linear models (absolute % change)	Reaching Married Adolescents (RMA) Project	9 arms: (1) home visits; (2) small group discussions; (3) combined; plus community dialogues; (4) control > assessed small sample which did not receive any intervention between midline and endline - to assess sustained effects in the absense of intervention	Not reported	Home visits, small group discussions, combined intervention, and supplemental community dialogue sessions	Trained community relais and mentors (local)	1.5 years intervention, 1 session/month; 1.5 years post-intervention follow-up	Individual/Community/Group	Social behavior change	Engaging men and boys, Social norms & networks, Couple communication, Small-group education	Contraceptive uptake/use	Current LARC use	Binary	18-months post-intervention	Individual	OR / AOR	Combined intervention vs. control	N/A	N/A	7.98	2.92–21.84	<.001	Significant (p<.05)	Positive	N/A	N/A	N/A
Fikree et al. (2017)	Strengthening Youth Friendly Health Services through Expanding Method Choice to include Long-Acting Reversible Contraceptives for Ethiopian Youth	2017	African Journal of Reproductive Health	Ethiopia	Does training service providers to counsel in youth-friendly ways and provide LARCs in youth-friendly service units increase LARC uptake among Ethiopian youth?	Sexually active women aged 15–24 visiting youth-friendly service units	15-24 years	Majority married	Female	Rural	Amhara and Tigray	Health facility	Quasi-experimental (non-randomized comparison group)	Moderate	Quantitative	Health facility service statistics (FP registers)	No	Yes	5513	5513	3,614 intervention arm; 1,899 non-intervention arm	N/A	Descriptive stats; chi-square tests; OR comparing pre/post LARC uptake	LARCs and Youth Project	Competency-based training for YFS providers to offer LARCs in YFS units + supportive supervision + peer demand generation	Adapted from Integrated Family Health Program + YFS platform, WHO standards; contextualized training	In-person provider training + peer educators + YFS service delivery	YFS providers (Health officer, nurse, midwife); peer educators; Regional health bureau master trainers	2-week training + ongoing YFS service for 8-month post-intervention follow-up	YFS units at public health centers	Enhancement, Social behavior change	Adolescent-responsive services, Peer-led approaches	Contraceptive uptake/use	Uptake of LARCs vs. short-acting methods	Binary	Aggregate 8 months post-intervention	Individual	OR / AOR	Facility assigned to intervention vs. control	N/A	N/A	1.3	Not reported	< 0.0001	Yes	Positive	N/A	N/A	N/A
Fikree et al. (2018)	The Effect of Peer Education in Dispelling Myths and Misconceptions about Long-Acting Reversible Contraception among Ethiopian Youth	2018	African Journal of Reproductive Health	Ethiopia	Does peer education training improve LARC referrals among Ethiopian youth via dispelling myths and generating demand?	Ethiopian youth aged 15–24 for FP referrals	15-24 years	Not reported	Male / Female	Rural	Amhara and Tigray	Health facility	Quasi-experimental (non-randomized comparison group)	Moderate	Quantitative	Peer educator reporting forms + YFS service registers	No	Yes	N/A	N/A	N/A	N/A	Descriptive stats; chi-squared; OR of referrals pre/post	LARCs and Youth Project	3-day training for peer-educators on LARC knowledge and myths; peer-led counseling and referral at YFS units and schools	Adapted from Integrated Family Health Program + YFS platform, WHO standards; contextualized training	In-person (peer-led group and individual counseling)	Peer educators (trained youth)	3-day training + 6 months post-training demand generation	YFS units, schools, community	Enhancement, Social behavior change	Adolescent-responsive services, Peer-led approaches	Referral	FP referral: Male	Binary	Pre vs. post (5 months pre; 6 months post)	Individual	OR / AOR	Facility assigned to intervention vs. control	N/A	N/A	1.4	Not reported	<.0001	Significant (p<.05)	Positive	N/A	N/A	N/A
Fikree et al. (2018)	The Effect of Peer Education in Dispelling Myths and Misconceptions about Long-Acting Reversible Contraception among Ethiopian Youth	2018	African Journal of Reproductive Health	Ethiopia	Does peer education training improve LARC referrals among Ethiopian youth via dispelling myths and generating demand?	Ethiopian youth aged 15–24 for FP referrals	15-24 years	Not reported	Male / Female	Rural	Amhara and Tigray	Health facility	Quasi-experimental (non-randomized comparison group)	Moderate	Quantitative	Peer educator reporting forms + YFS service registers	No	Yes	N/A	N/A	N/A	N/A	Descriptive stats; chi-squared; OR of referrals pre/post	LARCs and Youth Project	3-day training for peer-educators on LARC knowledge and myths; peer-led counseling and referral at YFS units and schools	Adapted from Integrated Family Health Program + YFS platform, WHO standards; contextualized training	In-person (peer-led group and individual counseling)	Peer educators (trained youth)	3-day training + 6 months post-training demand generation	YFS units, schools, community	Enhancement, Social behavior change	Adolescent-responsive services, Peer-led approaches	Referral	FP referral: Female	Binary	Pre vs. post (5 months pre; 6 months post)	Individual	OR / AOR	Facility assigned to intervention vs. control	N/A	N/A	0.75	Not reported	0.7	Null (p>.1)	Null	N/A	N/A	N/A
Fikree et al. (2018)	The Effect of Peer Education in Dispelling Myths and Misconceptions about Long-Acting Reversible Contraception among Ethiopian Youth	2018	African Journal of Reproductive Health	Ethiopia	Does peer education training improve LARC referrals among Ethiopian youth via dispelling myths and generating demand?	Ethiopian youth aged 15–24 for FP referrals	15-24 years	Not reported	Male / Female	Rural	Amhara and Tigray	Health facility	Quasi-experimental (non-randomized comparison group)	Moderate	Quantitative	Peer educator reporting forms + YFS service registers	No	Yes	N/A	N/A	N/A	N/A	Descriptive stats; chi-squared; OR of referrals pre/post	LARCs and Youth Project	3-day training for peer-educators on LARC knowledge and myths; peer-led counseling and referral at YFS units and schools	Adapted from Integrated Family Health Program + YFS platform, WHO standards; contextualized training	In-person (peer-led group and individual counseling)	Peer educators (trained youth)	3-day training + 6 months post-training demand generation	YFS units, schools, community	Enhancement, Social behavior change	Adolescent-responsive services, Peer-led approaches	Referral	LARC referral	Binary	Pre vs. post (5 months pre; 6 months post)	Individual	OR / AOR	Facility assigned to intervention vs. control	N/A	N/A	0.83	Not reported	0.6	Null (p>.1)	Null	N/A	N/A	N/A
Fikree et al. (2020)	Scaling Up a Strengthened Youth-Friendly Service Delivery Model to Include Long-Acting Reversible Contraceptives in Ethiopia: A Mixed Methods Retrospective Assessment	2020	International Journal of Health Policy and Management	Ethiopia	What are the successes, challenges, and barriers to scaling up a YFS delivery model offering expanded contraceptive method mix, including LARCs, and what is the impact on contraceptive uptake?	Sexually active women <25 years accessing YFS units in Ethiopia	15-24 years	Not reported	Female	Rural	Amhara and Tigray	Health facility	Retrospective observational program evaluation	Very weak	Mixed Methods	HMIS FP registers + key informant interviews	No	No	N/A	N/A	N/A	N/A	Qualitative data triangulation, Descriptive stats; t-tests pre/post LARC uptake	LARCs and Youth Project	Scaling up YFS delivery model with competency-based provider training on LARCs, peer education to dispel myths, and "one-stop-shop" delivery.	Scale-up of prior pilot tested YFS model	In-person provider training + peer-led education	YFS providers (health officer, nurse, midwife), peer educators, government	3–5 day training; post-implementation follow-up for 13 months	YFS units within public health centers	Enhancement	Adolescent-responsive services, Peer-led approaches	Contraceptive uptake/use	Uptake of LARCs vs. short-acting methods	Binary	6 months pre- and post-LARCs training	Individual	Mean diff (pre vs. post)	Health center 1 - pre vs. post	N/A	N/A	pre 10.2%; post 11.1%	Not reported	0.86	Null (p>.1)	Null	N/A	N/A	N/A
Fikree et al. (2020)	Scaling Up a Strengthened Youth-Friendly Service Delivery Model to Include Long-Acting Reversible Contraceptives in Ethiopia: A Mixed Methods Retrospective Assessment	2020	International Journal of Health Policy and Management	Ethiopia	What are the successes, challenges, and barriers to scaling up a YFS delivery model offering expanded contraceptive method mix, including LARCs, and what is the impact on contraceptive uptake?	Sexually active women <25 years accessing YFS units in Ethiopia	15-24 years	Not reported	Female	Rural	Amhara and Tigray	Health facility	Retrospective observational program evaluation	Very weak	Mixed Methods	HMIS FP registers + key informant interviews	No	No	N/A	N/A	N/A	N/A	Qualitative data triangulation, Descriptive stats; t-tests pre/post LARC uptake	LARCs and Youth Project	Scaling up YFS delivery model with competency-based provider training on LARCs, peer education to dispel myths, and "one-stop-shop" delivery.	Scale-up of prior pilot tested YFS model	In-person provider training + peer-led education	YFS providers (health officer, nurse, midwife), peer educators, government	3–5 day training; post-implementation follow-up for 13 months	YFS units within public health centers	Enhancement	Adolescent-responsive services, Peer-led approaches	Contraceptive uptake/use	Uptake of LARCs vs. short-acting methods	Binary	7 months pre- and post-LARCs training	Individual	Mean diff (pre vs. post)	Health center 1 - pre vs. post	N/A	N/A	Pre: 54.7%; post 58.7%	Not reported	0.66	Null (p>.1)	Null	N/A	N/A	N/A
Fikree et al. (2020)	Scaling Up a Strengthened Youth-Friendly Service Delivery Model to Include Long-Acting Reversible Contraceptives in Ethiopia: A Mixed Methods Retrospective Assessment	2020	International Journal of Health Policy and Management	Ethiopia	What are the successes, challenges, and barriers to scaling up a YFS delivery model offering expanded contraceptive method mix, including LARCs, and what is the impact on contraceptive uptake?	Sexually active women <25 years accessing YFS units in Ethiopia	15-24 years	Not reported	Female	Rural	Amhara and Tigray	Health facility	Retrospective observational program evaluation	Very weak	Mixed Methods	HMIS FP registers + key informant interviews	No	No	N/A	N/A	N/A	N/A	Qualitative data triangulation, Descriptive stats; t-tests pre/post LARC uptake	LARCs and Youth Project	Scaling up YFS delivery model with competency-based provider training on LARCs, peer education to dispel myths, and "one-stop-shop" delivery.	Scale-up of prior pilot tested YFS model	In-person provider training + peer-led education	YFS providers (health officer, nurse, midwife), peer educators, government	3–5 day training; post-implementation follow-up for 13 months	YFS units within public health centers	Enhancement	Adolescent-responsive services, Peer-led approaches	Contraceptive uptake/use	Uptake of LARCs vs. short-acting methods	Binary	8 months pre- and post-LARCs training	Individual	Mean diff (pre vs. post)	Health center 1 - pre vs. post	N/A	N/A	Pre: 28.6%; post 21.3%	Not reported	0.17	Null (p>.1)	Null	N/A	N/A	N/A
Fikree et al. (2020)	Scaling Up a Strengthened Youth-Friendly Service Delivery Model to Include Long-Acting Reversible Contraceptives in Ethiopia: A Mixed Methods Retrospective Assessment	2020	International Journal of Health Policy and Management	Ethiopia	What are the successes, challenges, and barriers to scaling up a YFS delivery model offering expanded contraceptive method mix, including LARCs, and what is the impact on contraceptive uptake?	Sexually active women <25 years accessing YFS units in Ethiopia	15-24 years	Not reported	Female	Rural	Amhara and Tigray	Health facility	Retrospective observational program evaluation	Very weak	Mixed Methods	HMIS FP registers + key informant interviews	No	No	N/A	N/A	N/A	N/A	Qualitative data triangulation, Descriptive stats; t-tests pre/post LARC uptake	LARCs and Youth Project	Scaling up YFS delivery model with competency-based provider training on LARCs, peer education to dispel myths, and "one-stop-shop" delivery.	Scale-up of prior pilot tested YFS model	In-person provider training + peer-led education	YFS providers (health officer, nurse, midwife), peer educators, government	3–5 day training; post-implementation follow-up for 13 months	YFS units within public health centers	Enhancement	Adolescent-responsive services, Peer-led approaches	Contraceptive uptake/use	Uptake of LARCs vs. short-acting methods	Binary	9 months pre- and post-LARCs training	Individual	Mean diff (pre vs. post)	Health center 1 - pre vs. post	N/A	N/A	Pre: 37.1%; post 50.7%	Not reported	0.05	Significant (p<.05)	Positive	N/A	N/A	N/A
Fikree et al. (2020)	Scaling Up a Strengthened Youth-Friendly Service Delivery Model to Include Long-Acting Reversible Contraceptives in Ethiopia: A Mixed Methods Retrospective Assessment	2020	International Journal of Health Policy and Management	Ethiopia	What are the successes, challenges, and barriers to scaling up a YFS delivery model offering expanded contraceptive method mix, including LARCs, and what is the impact on contraceptive uptake?	Sexually active women <25 years accessing YFS units in Ethiopia	15-24 years	Not reported	Female	Rural	Amhara and Tigray	Health facility	Retrospective observational program evaluation	Very weak	Mixed Methods	HMIS FP registers + key informant interviews	No	No	N/A	N/A	N/A	N/A	Qualitative data triangulation, Descriptive stats; t-tests pre/post LARC uptake	LARCs and Youth Project	Scaling up YFS delivery model with competency-based provider training on LARCs, peer education to dispel myths, and "one-stop-shop" delivery.	Scale-up of prior pilot tested YFS model	In-person provider training + peer-led education	YFS providers (health officer, nurse, midwife), peer educators, government	3–5 day training; post-implementation follow-up for 13 months	YFS units within public health centers	Enhancement	Adolescent-responsive services, Peer-led approaches	Contraceptive uptake/use	Uptake of LARCs vs. short-acting methods	Binary	10 months pre- and post-LARCs training	Individual	Mean diff (pre vs. post)	Health center 1 - pre vs. post	N/A	N/A	Pre: 50.8%; post 41.6%	Not reported	0.11	Null (p>.1)	Null	N/A	N/A	N/A
Fikree et al. (2020)	Scaling Up a Strengthened Youth-Friendly Service Delivery Model to Include Long-Acting Reversible Contraceptives in Ethiopia: A Mixed Methods Retrospective Assessment	2020	International Journal of Health Policy and Management	Ethiopia	What are the successes, challenges, and barriers to scaling up a YFS delivery model offering expanded contraceptive method mix, including LARCs, and what is the impact on contraceptive uptake?	Sexually active women <25 years accessing YFS units in Ethiopia	15-24 years	Not reported	Female	Rural	Amhara and Tigray	Health facility	Retrospective observational program evaluation	Very weak	Mixed Methods	HMIS FP registers + key informant interviews	No	No	N/A	N/A	N/A	N/A	Qualitative data triangulation, Descriptive stats; t-tests pre/post LARC uptake	LARCs and Youth Project	Scaling up YFS delivery model with competency-based provider training on LARCs, peer education to dispel myths, and "one-stop-shop" delivery.	Scale-up of prior pilot tested YFS model	In-person provider training + peer-led education	YFS providers (health officer, nurse, midwife), peer educators, government	3–5 day training; post-implementation follow-up for 13 months	YFS units within public health centers	Enhancement	Adolescent-responsive services, Peer-led approaches	Contraceptive uptake/use	Uptake of LARCs vs. short-acting methods	Binary	11 months pre- and post-LARCs training	Individual	Mean diff (pre vs. post)	Health center 1 - pre vs. post	N/A	N/A	Pre: 46.4%; post 48.6%	Not reported	0.65	Null (p>.1)	Null	N/A	N/A	N/A
Fikree et al. (2020)	Scaling Up a Strengthened Youth-Friendly Service Delivery Model to Include Long-Acting Reversible Contraceptives in Ethiopia: A Mixed Methods Retrospective Assessment	2020	International Journal of Health Policy and Management	Ethiopia	What are the successes, challenges, and barriers to scaling up a YFS delivery model offering expanded contraceptive method mix, including LARCs, and what is the impact on contraceptive uptake?	Sexually active women <25 years accessing YFS units in Ethiopia	15-24 years	Not reported	Female	Rural	Amhara and Tigray	Health facility	Retrospective observational program evaluation	Very weak	Mixed Methods	HMIS FP registers + key informant interviews	No	No	N/A	N/A	N/A	N/A	Qualitative data triangulation, Descriptive stats; t-tests pre/post LARC uptake	LARCs and Youth Project	Scaling up YFS delivery model with competency-based provider training on LARCs, peer education to dispel myths, and "one-stop-shop" delivery.	Scale-up of prior pilot tested YFS model	In-person provider training + peer-led education	YFS providers (health officer, nurse, midwife), peer educators, government	3–5 day training; post-implementation follow-up for 13 months	YFS units within public health centers	Enhancement	Adolescent-responsive services, Peer-led approaches	Contraceptive uptake/use	Uptake of LARCs vs. short-acting methods	Binary	12 months pre- and post-LARCs training	Individual	Mean diff (pre vs. post)	Health center 1 - pre vs. post	N/A	N/A	Pre: 22.5%; post 17.9%	Not reported	0.52	Null (p>.1)	Null	N/A	N/A	N/A
Fikree et al. (2020)	Scaling Up a Strengthened Youth-Friendly Service Delivery Model to Include Long-Acting Reversible Contraceptives in Ethiopia: A Mixed Methods Retrospective Assessment	2020	International Journal of Health Policy and Management	Ethiopia	What are the successes, challenges, and barriers to scaling up a YFS delivery model offering expanded contraceptive method mix, including LARCs, and what is the impact on contraceptive uptake?	Sexually active women <25 years accessing YFS units in Ethiopia	15-24 years	Not reported	Female	Rural	Amhara and Tigray	Health facility	Retrospective observational program evaluation	Very weak	Mixed Methods	HMIS FP registers + key informant interviews	No	No	N/A	N/A	N/A	N/A	Qualitative data triangulation, Descriptive stats; t-tests pre/post LARC uptake	LARCs and Youth Project	Scaling up YFS delivery model with competency-based provider training on LARCs, peer education to dispel myths, and "one-stop-shop" delivery.	Scale-up of prior pilot tested YFS model	In-person provider training + peer-led education	YFS providers (health officer, nurse, midwife), peer educators, government	3–5 day training; post-implementation follow-up for 13 months	YFS units within public health centers	Enhancement	Adolescent-responsive services, Peer-led approaches	Contraceptive uptake/use	Uptake of LARCs vs. short-acting methods	Binary	13 months pre- and post-LARCs training	Individual	Mean diff (pre vs. post)	Health center 1 - pre vs. post	N/A	N/A	Pre: 15.2%; post 33.8%	Not reported	0.01	Significant (p<.05)	Positive	N/A	N/A	N/A
Flanagan et al. (2021)	Behavioural intervention for adolescent uptake of family planning: a randomized controlled trial, Uganda	2021	Bulletin of the World Health Organization	Uganda	Does a peer-referral and clinic welcome intervention increase adolescent uptake of FP services?	Adolescents aged 15–19 years attending MSI BlueStar clinics	15-19 years	Mixed	Female	Urban, Peri-urban	Central, Eastern, Northern, Western Uganda	Health facility	Cluster randomized controlled trial (RCT)	Strong	Quantitative	Routine clinic data	Yes	Yes	116	~33,000 pre, ~15,000 post	60 clinics intervention (split into 32 core-plus, 28 core) 56 clinics control	0.08	Negative binomial regression (IRR); linear regression; robust Ses	N/A	Peer-referral cards (“refer-a-friend”) + youth-friendly clinic materials + wristbands; sub-group with provider training	Designed with behavioral insights (ideas42) based on barrier diagnosis	Peer-referral; in-clinic environment change	Community mobilizers; MSI clinic staff	6-month implementation (split pre-/post-COVID pause)	MSI BlueStar franchise clinics	Service delivery, Enhancement	Peer-led approaches, Financial incentives, Adolescent-responsive services	Service use	Number of visits for FP services by adolescents	Count	Monthly — 15-month baseline, 6-month intervention	Cluster	IRR / AIRR	Average intervention effect	N/A	N/A	1.45	1.14-1.85	Not reported	Significant (p<.05)	Positive	N/A	N/A	N/A
Flanagan et al. (2021)	Behavioural intervention for adolescent uptake of family planning: a randomized controlled trial, Uganda	2021	Bulletin of the World Health Organization	Uganda	Does a peer-referral and clinic welcome intervention increase adolescent uptake of FP services?	Adolescents aged 15–19 years attending MSI BlueStar clinics	15-19 years	Mixed	Female	Urban, Peri-urban	Central, Eastern, Northern, Western Uganda	Health facility	Cluster randomized controlled trial (RCT)	Strong	Quantitative	Routine clinic data	Yes	Yes	117	~33,000 pre, ~15,000 post	61 clinics intervention (split into 32 core-plus, 28 core) 56 clinics control	1.08	Negative binomial regression (IRR); linear regression; robust Ses	N/A	Peer-referral cards (“refer-a-friend”) + youth-friendly clinic materials + wristbands; sub-group with provider training	Designed with behavioral insights (ideas42) based on barrier diagnosis	Peer-referral; in-clinic environment change	Community mobilizers; MSI clinic staff	6-month implementation (split pre-/post-COVID pause)	MSI BlueStar franchise clinics	Service delivery, Enhancement	Peer-led approaches, Financial incentives	Service use	Number of visits for FP services by adolescents	Count	Monthly — 15-month baseline, 6-month intervention	Cluster	IRR / AIRR	Core intervention effect	N/A	N/A	1.26	0.97-1.65	Not reported	Null (p>.1)	Null	N/A	N/A	N/A
Flanagan et al. (2021)	Behavioural intervention for adolescent uptake of family planning: a randomized controlled trial, Uganda	2021	Bulletin of the World Health Organization	Uganda	Does a peer-referral and clinic welcome intervention increase adolescent uptake of FP services?	Adolescents aged 15–19 years attending MSI BlueStar clinics	15-19 years	Mixed	Female	Urban, Peri-urban	Central, Eastern, Northern, Western Uganda	Health facility	Cluster randomized controlled trial (RCT)	Strong	Quantitative	Routine clinic data	Yes	Yes	118	~33,000 pre, ~15,000 post	62 clinics intervention (split into 32 core-plus, 28 core) 56 clinics control	2.08	Negative binomial regression (IRR); linear regression; robust Ses	N/A	Peer-referral cards (“refer-a-friend”) + youth-friendly clinic materials + wristbands; sub-group with provider training	Designed with behavioral insights (ideas42) based on barrier diagnosis	Peer-referral; in-clinic environment change	Community mobilizers; MSI clinic staff	6-month implementation (split pre-/post-COVID pause)	MSI BlueStar franchise clinics	Service delivery, Enhancement	Peer-led approaches, Financial incentives, Adolescent-responsive services	Service use	Number of visits for FP services by adolescents	Count	Monthly — 15-month baseline, 6-month intervention	Cluster	IRR / AIRR	Core-plus intervention effect	N/A	N/A	1.62	1.21-2.17	Not reported	Significant (p<.05)	Positive	N/A	N/A	N/A
Gage et al. (2023)	Evaluation of the effect of the Momentum project on family planning outcomes among first-time mothers aged 15–24 years in Kinshasa, DRC	2023	Contraception	Democratic Republic of the Congo	What is the effect of the Momentum project (gender-transformative intervention) on postpartum FP knowledge, attitudes, norms, agency, partner communication, and contraceptive use among first-time mothers?	Nulliparous pregnant women aged 15–24 years (FTMs), Kinshasa	15-24 years	Mixed	Female	Urban	Kinshasa	Other	Quasi-experimental (non-randomized comparison group)	Moderate	Quantitative	Longitudinal survey	Yes	Yes	1927	1927	Intervention N ≈ 964, Comparison N ≈ 963	0.21	Average Treatment Effects (ATE) models; IPW; ITT woth Difference-in-differences	Momentum	Nursing student-led home visits + group education using gender-transformative curriculum (Program M) for FTMs and partners + SBC interventions	Locally adapted Program M + community SBC + service linkage	Home visits + group sessions + referral to health services	Nursing students + Tulane Int'l + MOH	16 months	Home and community-based (with linkage to health zones)	Social behavior change	Engaging men and boys, Social norms & networks, Interpersonal communication, Couple communication, Small-group education, Extension worker	Contraceptive uptake/use	Used a modern contraceptive within 12 months of delivery	Binary	Endline (4-6 months post intervention)	Individual	RD / APD	Assigned to receive intervention vs. control	N/A	N/A	0.133	0.08-0.18	<.01	Significant (p<.05)	Positive	N/A	N/A	N/A
Gage et al. (2023)	Evaluation of the effect of the Momentum project on family planning outcomes among first-time mothers aged 15–24 years in Kinshasa, DRC	2023	Contraception	Democratic Republic of the Congo	What is the effect of the Momentum project (gender-transformative intervention) on postpartum FP knowledge, attitudes, norms, agency, partner communication, and contraceptive use among first-time mothers?	Nulliparous pregnant women aged 15–24 years (FTMs), Kinshasa	15-24 years	Mixed	Female	Urban	Kinshasa	Other	Quasi-experimental (non-randomized comparison group)	Moderate	Quantitative	Longitudinal survey	Yes	Yes	1927	1927	Intervention N ≈ 964, Comparison N ≈ 964	0.21	Average Treatment Effects (ATE) models; IPW; ITT woth Difference-in-differences	Momentum	Nursing student-led home visits + group education using gender-transformative curriculum (Program M) for FTMs and partners + SBC interventions	Locally adapted Program M + community SBC + service linkage	Home visits + group sessions + referral to health services	Nursing students + Tulane Int'l + MOH	16 months	Home and community-based (with linkage to health zones)	Social behavior change	Engaging men and boys, Social norms & networks, Interpersonal communication, Couple communication, Small-group education, Extension worker	Knowledge	Mean number of modern methods known	Count	Baseline/endline difference (4-6 months post intervention)	Individual	Mean diff (int vs. control)	Assigned to receive intervention vs. control	N/A	N/A	0.58	0.35-0.81	<.01	Significant (p<.05)	Positive	N/A	N/A	N/A
Gage et al. (2023)	Evaluation of the effect of the Momentum project on family planning outcomes among first-time mothers aged 15–24 years in Kinshasa, DRC	2023	Contraception	Democratic Republic of the Congo	What is the effect of the Momentum project (gender-transformative intervention) on postpartum FP knowledge, attitudes, norms, agency, partner communication, and contraceptive use among first-time mothers?	Nulliparous pregnant women aged 15–24 years (FTMs), Kinshasa	15-24 years	Mixed	Female	Urban	Kinshasa	Other	Quasi-experimental (non-randomized comparison group)	Moderate	Quantitative	Longitudinal survey	Yes	Yes	1927	1927	Intervention N ≈ 964, Comparison N ≈ 965	0.21	Average Treatment Effects (ATE) models; IPW; ITT woth Difference-in-differences	Momentum	Nursing student-led home visits + group education using gender-transformative curriculum (Program M) for FTMs and partners + SBC interventions	Locally adapted Program M + community SBC + service linkage	Home visits + group sessions + referral to health services	Nursing students + Tulane Int'l + MOH	16 months	Home and community-based (with linkage to health zones)	Social behavior change	Engaging men and boys, Social norms & networks, Interpersonal communication, Couple communication, Small-group education, Extension worker	Attitudes	Mean number of FP myths endorsed	Continuous	Baseline/endline difference (4-6 months post intervention)	Individual	Mean diff (int vs. control)	Assigned to receive intervention vs. control	N/A	N/A	-0.85	-1.15-0.54	<.01	Significant (p<.05)	Positive	N/A	N/A	N/A
Gage et al. (2023)	Evaluation of the effect of the Momentum project on family planning outcomes among first-time mothers aged 15–24 years in Kinshasa, DRC	2023	Contraception	Democratic Republic of the Congo	What is the effect of the Momentum project (gender-transformative intervention) on postpartum FP knowledge, attitudes, norms, agency, partner communication, and contraceptive use among first-time mothers?	Nulliparous pregnant women aged 15–24 years (FTMs), Kinshasa	15-24 years	Mixed	Female	Urban	Kinshasa	Other	Quasi-experimental (non-randomized comparison group)	Moderate	Quantitative	Longitudinal survey	Yes	Yes	1927	1927	Intervention N ≈ 964, Comparison N ≈ 966	0.21	Average Treatment Effects (ATE) models; IPW; ITT woth Difference-in-differences	Momentum	Nursing student-led home visits + group education using gender-transformative curriculum (Program M) for FTMs and partners + SBC interventions	Locally adapted Program M + community SBC + service linkage	Home visits + group sessions + referral to health services	Nursing students + Tulane Int'l + MOH	16 months	Home and community-based (with linkage to health zones)	Social behavior change	Engaging men and boys, Social norms & networks, Interpersonal communication, Couple communication, Small-group education, Extension worker	Norms/approval	Approval of FP	Binary	Baseline/endline difference (4-6 months post intervention)	Individual	RDR (DiD)	Assigned to receive intervention vs. control	N/A	N/A	0.1	0.05-0.15	<.01	Significant (p<.05)	Positive	N/A	N/A	N/A
Gage et al. (2023)	Evaluation of the effect of the Momentum project on family planning outcomes among first-time mothers aged 15–24 years in Kinshasa, DRC	2023	Contraception	Democratic Republic of the Congo	What is the effect of the Momentum project (gender-transformative intervention) on postpartum FP knowledge, attitudes, norms, agency, partner communication, and contraceptive use among first-time mothers?	Nulliparous pregnant women aged 15–24 years (FTMs), Kinshasa	15-24 years	Mixed	Female	Urban	Kinshasa	Other	Quasi-experimental (non-randomized comparison group)	Moderate	Quantitative	Longitudinal survey	Yes	Yes	1927	1927	Intervention N ≈ 964, Comparison N ≈ 967	0.21	Average Treatment Effects (ATE) models; IPW; ITT woth Difference-in-differences	Momentum	Nursing student-led home visits + group education using gender-transformative curriculum (Program M) for FTMs and partners + SBC interventions	Locally adapted Program M + community SBC + service linkage	Home visits + group sessions + referral to health services	Nursing students + Tulane Int'l + MOH	16 months	Home and community-based (with linkage to health zones)	Social behavior change	Engaging men and boys, Social norms & networks, Interpersonal communication, Couple communication, Small-group education, Extension worker	Norms/approval	Perceived significant others believe she ought to discuss postpartum FP with her male partner	Binary	Baseline/endline difference (4-6 months post intervention)	Individual	RDR (DiD)	Assigned to receive intervention vs. control	N/A	N/A	0.09	0.04-0.14	<.01	Significant (p<.05)	Positive	N/A	N/A	N/A
Gage et al. (2023)	Evaluation of the effect of the Momentum project on family planning outcomes among first-time mothers aged 15–24 years in Kinshasa, DRC	2023	Contraception	Democratic Republic of the Congo	What is the effect of the Momentum project (gender-transformative intervention) on postpartum FP knowledge, attitudes, norms, agency, partner communication, and contraceptive use among first-time mothers?	Nulliparous pregnant women aged 15–24 years (FTMs), Kinshasa	15-24 years	Mixed	Female	Urban	Kinshasa	Other	Quasi-experimental (non-randomized comparison group)	Moderate	Quantitative	Longitudinal survey	Yes	Yes	1927	1927	Intervention N ≈ 964, Comparison N ≈ 968	0.21	Average Treatment Effects (ATE) models; IPW; ITT woth Difference-in-differences	Momentum	Nursing student-led home visits + group education using gender-transformative curriculum (Program M) for FTMs and partners + SBC interventions	Locally adapted Program M + community SBC + service linkage	Home visits + group sessions + referral to health services	Nursing students + Tulane Int'l + MOH	16 months	Home and community-based (with linkage to health zones)	Social behavior change	Engaging men and boys, Social norms & networks, Interpersonal communication, Couple communication, Small-group education, Extension worker	Norms/approval	Perceived significant others believe she ought to use postpartum FP	Binary	Baseline/endline difference (4-6 months post intervention)	Individual	RDR (DiD)	Assigned to receive intervention vs. control	N/A	N/A	0.05	<0.01-0.1	0.06	Marginally significant (p<.1)	Positive	N/A	N/A	N/A
Gage et al. (2023)	Evaluation of the effect of the Momentum project on family planning outcomes among first-time mothers aged 15–24 years in Kinshasa, DRC	2023	Contraception	Democratic Republic of the Congo	What is the effect of the Momentum project (gender-transformative intervention) on postpartum FP knowledge, attitudes, norms, agency, partner communication, and contraceptive use among first-time mothers?	Nulliparous pregnant women aged 15–24 years (FTMs), Kinshasa	15-24 years	Mixed	Female	Urban	Kinshasa	Other	Quasi-experimental (non-randomized comparison group)	Moderate	Quantitative	Longitudinal survey	Yes	Yes	1927	1927	Intervention N ≈ 964, Comparison N ≈ 969	0.21	Average Treatment Effects (ATE) models; IPW; ITT woth Difference-in-differences	Momentum	Nursing student-led home visits + group education using gender-transformative curriculum (Program M) for FTMs and partners + SBC interventions	Locally adapted Program M + community SBC + service linkage	Home visits + group sessions + referral to health services	Nursing students + Tulane Int'l + MOH	16 months	Home and community-based (with linkage to health zones)	Social behavior change	Engaging men and boys, Social norms & networks, Interpersonal communication, Couple communication, Small-group education, Extension worker	Norms/approval	Believed most first-time young mothers discuss postpartum FP with male partner before baby's birth	Binary	Baseline/endline difference (4-6 months post intervention)	Individual	RDR (DiD)	Assigned to receive intervention vs. control	N/A	N/A	0.03	-0.01-0.07	0.16	Null (p>.1)	Null	N/A	N/A	N/A
Gage et al. (2023)	Evaluation of the effect of the Momentum project on family planning outcomes among first-time mothers aged 15–24 years in Kinshasa, DRC	2023	Contraception	Democratic Republic of the Congo	What is the effect of the Momentum project (gender-transformative intervention) on postpartum FP knowledge, attitudes, norms, agency, partner communication, and contraceptive use among first-time mothers?	Nulliparous pregnant women aged 15–24 years (FTMs), Kinshasa	15-24 years	Mixed	Female	Urban	Kinshasa	Other	Quasi-experimental (non-randomized comparison group)	Moderate	Quantitative	Longitudinal survey	Yes	Yes	1927	1927	Intervention N ≈ 964, Comparison N ≈ 970	0.21	Average Treatment Effects (ATE) models; IPW; ITT woth Difference-in-differences	Momentum	Nursing student-led home visits + group education using gender-transformative curriculum (Program M) for FTMs and partners + SBC interventions	Locally adapted Program M + community SBC + service linkage	Home visits + group sessions + referral to health services	Nursing students + Tulane Int'l + MOH	16 months	Home and community-based (with linkage to health zones)	Social behavior change	Engaging men and boys, Social norms & networks, Interpersonal communication, Couple communication, Small-group education, Extension worker	Norms/approval	Believed most first-time young mothers use postpartum FP	Binary	Baseline/endline difference (4-6 months post intervention)	Individual	RDR (DiD)	Assigned to receive intervention vs. control	N/A	N/A	0.08	0.04-0.12	<.01	Significant (p<.05)	Positive	N/A	N/A	N/A
Gage et al. (2023)	Evaluation of the effect of the Momentum project on family planning outcomes among first-time mothers aged 15–24 years in Kinshasa, DRC	2023	Contraception	Democratic Republic of the Congo	What is the effect of the Momentum project (gender-transformative intervention) on postpartum FP knowledge, attitudes, norms, agency, partner communication, and contraceptive use among first-time mothers?	Nulliparous pregnant women aged 15–24 years (FTMs), Kinshasa	15-24 years	Mixed	Female	Urban	Kinshasa	Other	Quasi-experimental (non-randomized comparison group)	Moderate	Quantitative	Longitudinal survey	Yes	Yes	1927	1927	Intervention N ≈ 964, Comparison N ≈ 971	0.21	Average Treatment Effects (ATE) models; IPW; ITT woth Difference-in-differences	Momentum	Nursing student-led home visits + group education using gender-transformative curriculum (Program M) for FTMs and partners + SBC interventions	Locally adapted Program M + community SBC + service linkage	Home visits + group sessions + referral to health services	Nursing students + Tulane Int'l + MOH	16 months	Home and community-based (with linkage to health zones)	Social behavior change	Engaging men and boys, Social norms & networks, Interpersonal communication, Couple communication, Small-group education, Extension worker	Norms/approval	Perceived community members will say good things about women who use postpartum FP	Binary	Baseline/endline difference (4-6 months post intervention)	Individual	RDR (DiD)	Assigned to receive intervention vs. control	N/A	N/A	0.15	0.1-0.21	<.01	Significant (p<.05)	Positive	N/A	N/A	N/A
Gage et al. (2023)	Evaluation of the effect of the Momentum project on family planning outcomes among first-time mothers aged 15–24 years in Kinshasa, DRC	2023	Contraception	Democratic Republic of the Congo	What is the effect of the Momentum project (gender-transformative intervention) on postpartum FP knowledge, attitudes, norms, agency, partner communication, and contraceptive use among first-time mothers?	Nulliparous pregnant women aged 15–24 years (FTMs), Kinshasa	15-24 years	Mixed	Female	Urban	Kinshasa	Other	Quasi-experimental (non-randomized comparison group)	Moderate	Quantitative	Longitudinal survey	Yes	Yes	1927	1927	Intervention N ≈ 964, Comparison N ≈ 972	0.21	Average Treatment Effects (ATE) models; IPW; ITT woth Difference-in-differences	Momentum	Nursing student-led home visits + group education using gender-transformative curriculum (Program M) for FTMs and partners + SBC interventions	Locally adapted Program M + community SBC + service linkage	Home visits + group sessions + referral to health services	Nursing students + Tulane Int'l + MOH	16 months	Home and community-based (with linkage to health zones)	Social behavior change	Engaging men and boys, Social norms & networks, Interpersonal communication, Couple communication, Small-group education, Extension worker	Agency/Empowerment	Mean personal agency score	Continuous	Baseline/endline difference (4-6 months post intervention)	Individual	Mean diff (int vs. control)	Assigned to receive intervention vs. control	N/A	N/A	0.6	0.34-0.86	<.01	Significant (p<.05)	Positive	N/A	N/A	N/A
Gage et al. (2023)	Evaluation of the effect of the Momentum project on family planning outcomes among first-time mothers aged 15–24 years in Kinshasa, DRC	2023	Contraception	Democratic Republic of the Congo	What is the effect of the Momentum project (gender-transformative intervention) on postpartum FP knowledge, attitudes, norms, agency, partner communication, and contraceptive use among first-time mothers?	Nulliparous pregnant women aged 15–24 years (FTMs), Kinshasa	15-24 years	Mixed	Female	Urban	Kinshasa	Other	Quasi-experimental (non-randomized comparison group)	Moderate	Quantitative	Longitudinal survey	Yes	Yes	1927	1927	Intervention N ≈ 964, Comparison N ≈ 973	0.21	Average Treatment Effects (ATE) models; IPW; ITT woth Difference-in-differences	Momentum	Nursing student-led home visits + group education using gender-transformative curriculum (Program M) for FTMs and partners + SBC interventions	Locally adapted Program M + community SBC + service linkage	Home visits + group sessions + referral to health services	Nursing students + Tulane Int'l + MOH	16 months	Home and community-based (with linkage to health zones)	Social behavior change	Engaging men and boys, Social norms & networks, Interpersonal communication, Couple communication, Small-group education, Extension worker	Communication	Ever discussed FP use in early postpartum with male partner	Binary	Baseline/endline difference (4-6 months post intervention)	Individual	RDR (DiD)	Assigned to receive intervention vs. control	N/A	N/A	0.05	0.01-0.10	0.03	Significant (p<.05)	Positive	N/A	N/A	N/A
Gage et al. (2023)	Evaluation of the effect of the Momentum project on family planning outcomes among first-time mothers aged 15–24 years in Kinshasa, DRC	2023	Contraception	Democratic Republic of the Congo	What is the effect of the Momentum project (gender-transformative intervention) on postpartum FP knowledge, attitudes, norms, agency, partner communication, and contraceptive use among first-time mothers?	Nulliparous pregnant women aged 15–24 years (FTMs), Kinshasa	15-24 years	Mixed	Female	Urban	Kinshasa	Other	Quasi-experimental (non-randomized comparison group)	Moderate	Quantitative	Longitudinal survey	Yes	Yes	1927	1927	Intervention N ≈ 964, Comparison N ≈ 974	0.21	Average Treatment Effects (ATE) models; IPW; ITT woth Difference-in-differences	Momentum	Nursing student-led home visits + group education using gender-transformative curriculum (Program M) for FTMs and partners + SBC interventions	Locally adapted Program M + community SBC + service linkage	Home visits + group sessions + referral to health services	Nursing students + Tulane Int'l + MOH	16 months	Home and community-based (with linkage to health zones)	Social behavior change	Engaging men and boys, Social norms & networks, Interpersonal communication, Couple communication, Small-group education, Extension worker	Communication	Discussed FP use with health worker in early postpartum	Binary	Endline (4-6 months post intervention)	Individual	RD / APD	Assigned to receive intervention vs. control	N/A	N/A	0.23	0.19-0.28	<.01	Significant (p<.05)	Positive	N/A	N/A	N/A
Gage et al. (2023)	Evaluation of the effect of the Momentum project on family planning outcomes among first-time mothers aged 15–24 years in Kinshasa, DRC	2023	Contraception	Democratic Republic of the Congo	What is the effect of the Momentum project (gender-transformative intervention) on postpartum FP knowledge, attitudes, norms, agency, partner communication, and contraceptive use among first-time mothers?	Nulliparous pregnant women aged 15–24 years (FTMs), Kinshasa	15-24 years	Mixed	Female	Urban	Kinshasa	Other	Quasi-experimental (non-randomized comparison group)	Moderate	Quantitative	Longitudinal survey	Yes	Yes	1927	1927	Intervention N ≈ 964, Comparison N ≈ 975	0.21	Average Treatment Effects (ATE) models; IPW; ITT woth Difference-in-differences	Momentum	Nursing student-led home visits + group education using gender-transformative curriculum (Program M) for FTMs and partners + SBC interventions	Locally adapted Program M + community SBC + service linkage	Home visits + group sessions + referral to health services	Nursing students + Tulane Int'l + MOH	16 months	Home and community-based (with linkage to health zones)	Social behavior change	Engaging men and boys, Social norms & networks, Interpersonal communication, Couple communication, Small-group education, Extension worker	Communication	Discussed Fp use with partner after delivery	Binary	Endline (4-6 months post intervention)	Individual	RD / APD	Assigned to receive intervention vs. control	N/A	N/A	0.09	0.04-0.14	0.01	Significant (p<.05)	Positive	N/A	N/A	N/A
Gage et al. (2023)	Evaluation of the effect of the Momentum project on family planning outcomes among first-time mothers aged 15–24 years in Kinshasa, DRC	2023	Contraception	Democratic Republic of the Congo	What is the effect of the Momentum project (gender-transformative intervention) on postpartum FP knowledge, attitudes, norms, agency, partner communication, and contraceptive use among first-time mothers?	Nulliparous pregnant women aged 15–24 years (FTMs), Kinshasa	15-24 years	Mixed	Female	Urban	Kinshasa	Other	Quasi-experimental (non-randomized comparison group)	Moderate	Quantitative	Longitudinal survey	Yes	Yes	1927	1927	Intervention N ≈ 964, Comparison N ≈ 976	0.21	Average Treatment Effects (ATE) models; IPW; ITT woth Difference-in-differences	Momentum	Nursing student-led home visits + group education using gender-transformative curriculum (Program M) for FTMs and partners + SBC interventions	Locally adapted Program M + community SBC + service linkage	Home visits + group sessions + referral to health services	Nursing students + Tulane Int'l + MOH	16 months	Home and community-based (with linkage to health zones)	Social behavior change	Engaging men and boys, Social norms & networks, Interpersonal communication, Couple communication, Small-group education, Extension worker	Service use	Went to a health facility to obtain contraception early in postpartum period	Binary	Endline (4-6 months post intervention)	Individual	RD / APD	Assigned to receive intervention vs. control	N/A	N/A	0.13	0.09-0.17	<.01	Significant (p<.05)	Positive	N/A	N/A	N/A
Gage et al. (2023)	Expanding contraceptive choice among first-time mothers age 15–24 in Kinshasa: The Momentum pilot project	2023	Frontiers in Global Women’s Health	Democratic Republic of the Congo (DRC)	What is the effectiveness of the Momentum project in expanding contraceptive choice and uptake among first-time mothers aged 15-24 years reporting currently using a modern contraceptive method at endline?	First-time mothers aged 15–24 years in Kinshasa reporting currently using a modern contraceptive method at endline	15-24 years	Mixed	Female	Urban	Kinshasa	Other	Quasi-experimental (non-randomized comparison group)	Moderate	Quantitative	Household survey	Yes	Yes	761	761	intervention = 415; control = 346	0.08	Intention-to-treat and dose-response analyses with inverse probability weighting, logistic regression analysis.	Momentum	Provided group-based education, counseling, and expanded contraceptive options to first-time mothers via community health workers	Adapted from A360 approach, focused on life stage and local needs	Group education, facility-based and community-based counseling	Community health workers, nurses	16 months, monthly group education sessions and home visits	Home and community-based (with linkage to health zones)	Social behavior change	Engaging men and boys, Social norms & networks, Interpersonal communication, Couple communication, Small-group education, Extension worker	Contraceptive method	Using impant vs. other modern method	Binary	Endline	Individual	RD / APD	Assigned to receive intervention vs. control	N/A	N/A	0.159	0.1-0.2	<.001	Significant (p<.05)	Positive	N/A	N/A	N/A
Gage et al. (2023)	Expanding contraceptive choice among first-time mothers age 15–24 in Kinshasa: The Momentum pilot project	2023	Frontiers in Global Women’s Health	Democratic Republic of the Congo (DRC)	What is the effectiveness of the Momentum project in expanding contraceptive choice and uptake among first-time mothers aged 15-24 years reporting currently using a modern contraceptive method at endline?	First-time mothers aged 15–24 years in Kinshasa reporting currently using a modern contraceptive method at endline	15-24 years	Mixed	Female	Urban	Kinshasa	Other	Quasi-experimental (non-randomized comparison group)	Moderate	Quantitative	Household survey	Yes	Yes	761	761	intervention = 415; control = 347	1.08	Intention-to-treat and dose-response analyses with inverse probability weighting, logistic regression analysis.	Momentum	Provided group-based education, counseling, and expanded contraceptive options to first-time mothers via community health workers	Adapted from A360 approach, focused on life stage and local needs	Group education, facility-based and community-based counseling	Community health workers, nurses	17 months, monthly group education sessions and home visits	Home and community-based (with linkage to health zones)	Social behavior change	Engaging men and boys, Social norms & networks, Interpersonal communication, Couple communication, Small-group education, Extension worker	Service use	Informed choice	Binary	Endline	Individual	RD / APD	Assigned to receive intervention vs. control	N/A	N/A	0.14	0.07-0.20	<.001	Significant (p<.05)	Positive	N/A	N/A	N/A
Gage et al. (2023)	Expanding contraceptive choice among first-time mothers age 15–24 in Kinshasa: The Momentum pilot project	2023	Frontiers in Global Women’s Health	Democratic Republic of the Congo (DRC)	What is the effectiveness of the Momentum project in expanding contraceptive choice and uptake among first-time mothers aged 15-24 years reporting currently using a modern contraceptive method at endline?	First-time mothers aged 15–24 years in Kinshasa reporting currently using a modern contraceptive method at endline	15-24 years	Mixed	Female	Urban	Kinshasa	Other	Quasi-experimental (non-randomized comparison group)	Moderate	Quantitative	Household survey	Yes	Yes	761	761	intervention = 415; control = 348	2.08	Intention-to-treat and dose-response analyses with inverse probability weighting, logistic regression analysis.	Momentum	Provided group-based education, counseling, and expanded contraceptive options to first-time mothers via community health workers	Adapted from A360 approach, focused on life stage and local needs	Group education, facility-based and community-based counseling	Community health workers, nurses	18 months, monthly group education sessions and home visits	Home and community-based (with linkage to health zones)	Social behavior change	Engaging men and boys, Social norms & networks, Interpersonal communication, Couple communication, Small-group education, Extension worker	Service use	Obtained current method from CHW	Binary	Endline	Individual	RD / APD	Assigned to receive intervention vs. control	N/A	N/A	0.29	0.24-0.34	<.001	Significant (p<.05)	Positive	N/A	N/A	N/A
Gage et al. (2023)	Expanding contraceptive choice among first-time mothers age 15–24 in Kinshasa: The Momentum pilot project	2023	Frontiers in Global Women’s Health	Democratic Republic of the Congo (DRC)	What is the effectiveness of the Momentum project in expanding contraceptive choice and uptake among first-time mothers aged 15-24 years reporting currently using a modern contraceptive method at endline?	First-time mothers aged 15–24 years in Kinshasa reporting currently using a modern contraceptive method at endline	15-24 years	Mixed	Female	Urban	Kinshasa	Other	Quasi-experimental (non-randomized comparison group)	Moderate	Quantitative	Household survey	Yes	Yes	761	761	intervention = 415; control = 349	3.08	Intention-to-treat and dose-response analyses with inverse probability weighting, logistic regression analysis.	Momentum	Provided group-based education, counseling, and expanded contraceptive options to first-time mothers via community health workers	Adapted from A360 approach, focused on life stage and local needs	Group education, facility-based and community-based counseling	Community health workers, nurses	19 months, monthly group education sessions and home visits	Home and community-based (with linkage to health zones)	Social behavior change	Engaging men and boys, Social norms & networks, Interpersonal communication, Couple communication, Small-group education, Extension worker	Service use	Received counseling from CHW	Binary	Endline	Individual	RD / APD	Assigned to receive intervention vs. control	N/A	N/A	0.53	0.48-0.58	<.001	Significant (p<.05)	Positive	N/A	N/A	N/A
Gayles et al. (2023)	Balancing Quality, Intensity and Scalability: Results of a Multi-level Sexual and Reproductive Health Intervention for Very Young Adolescents in Kinshasa	2023	Journal of Adolescent Health	Democratic Republic of the Congo	hat is the effect of the Growing Up GREAT! intervention on SRH knowledge, gender norms, and communication among very young adolescents in Kinshasa?	Very young adolescents (VYAs) aged 10–14 attending school in urban Kinshasa	10-14 years	Unmarried	Male / Female	Urban	Kinshasa	School	Quasi-experimental (non-randomized comparison group)	Moderate	Quantitative	Student surveys	Yes	Yes	2842	2842	1459 intervention, 1383 control	0.11	Difference-in-differences models, logistic regression, school fixed effects, clustering	Growing Up GREAT!	Multi-level SRH and gender transformative program using story-based curricula, community discussions, and caregiver/provider engagement	Adapted from the GREAT! model for younger urban students and school delivery	Group sessions, visual story cards, community dialogues	Trained peer facilitators, teachers, community leaders	6-month delivery, 8–10 group sessions	Schools and community venues	Social behavior change	Engaging men and boys, Social norms & networks, Small-group education, School-based education, Peer-led approaches	Knowledge	Pregnancy knowledge index score (0-12 - in school children)	Continuous	Change over time (baseline - follow-up)	Individual	Mean diff (int vs. control)	Assigned to receive intervention vs. control	N/A	N/A	0.48	0.18-0.77	<.01	Significant (p<.05)	Positive	N/A	N/A	N/A
Gayles et al. (2023)	Balancing Quality, Intensity and Scalability: Results of a Multi-level Sexual and Reproductive Health Intervention for Very Young Adolescents in Kinshasa	2023	Journal of Adolescent Health	Democratic Republic of the Congo	hat is the effect of the Growing Up GREAT! intervention on SRH knowledge, gender norms, and communication among very young adolescents in Kinshasa?	Very young adolescents (VYAs) aged 10–14 attending school in urban Kinshasa	10-14 years	Unmarried	Male / Female	Urban	Kinshasa	School	Quasi-experimental (non-randomized comparison group)	Moderate	Quantitative	Student surveys	Yes	Yes	2842	2842	1460 intervention, 1383 control	1.11	Difference-in-differences models, logistic regression, school fixed effects, clustering	Growing Up GREAT!	Multi-level SRH and gender transformative program using story-based curricula, community discussions, and caregiver/provider engagement	Adapted from the GREAT! model for younger urban students and school delivery	Group sessions, visual story cards, community dialogues	Trained peer facilitators, teachers, community leaders	6-month delivery, 8–10 group sessions	Schools and community venues	Social behavior change	Engaging men and boys, Social norms & networks, Small-group education, School-based education, Peer-led approaches	Knowledge	Pregnancy knowledge index score (0-12 - out of school children)	Continuous	Change over time (baseline - follow-up)	Individual	Mean diff (int vs. control)	Assigned to receive intervention vs. control	N/A	N/A	0.12	-0.42-0.66	>.05	Null (p>.1)	Null	N/A	N/A	N/A
Gayles et al. (2023)	Balancing Quality, Intensity and Scalability: Results of a Multi-level Sexual and Reproductive Health Intervention for Very Young Adolescents in Kinshasa	2023	Journal of Adolescent Health	Democratic Republic of the Congo	hat is the effect of the Growing Up GREAT! intervention on SRH knowledge, gender norms, and communication among very young adolescents in Kinshasa?	Very young adolescents (VYAs) aged 10–14 attending school in urban Kinshasa	10-14 years	Unmarried	Male / Female	Urban	Kinshasa	School	Quasi-experimental (non-randomized comparison group)	Moderate	Quantitative	Student surveys	Yes	Yes	2842	2842	1461 intervention, 1383 control	2.11	Difference-in-differences models, logistic regression, school fixed effects, clustering	Growing Up GREAT!	Multi-level SRH and gender transformative program using story-based curricula, community discussions, and caregiver/provider engagement	Adapted from the GREAT! model for younger urban students and school delivery	Group sessions, visual story cards, community dialogues	Trained peer facilitators, teachers, community leaders	6-month delivery, 8–10 group sessions	Schools and community venues	Social behavior change	Engaging men and boys, Social norms & networks, Small-group education, School-based education, Peer-led approaches	Knowledge	Knows where to get contraception (girls only - in school)	Binary	Change over time (baseline - follow-up)	Individual	OR / AOR	Assigned to receive intervention vs. control	N/A	N/A	1.47	0.94-2.30	>.05	Null (p>.1)	Null	N/A	N/A	N/A
Gayles et al. (2023)	Balancing Quality, Intensity and Scalability: Results of a Multi-level Sexual and Reproductive Health Intervention for Very Young Adolescents in Kinshasa	2023	Journal of Adolescent Health	Democratic Republic of the Congo	hat is the effect of the Growing Up GREAT! intervention on SRH knowledge, gender norms, and communication among very young adolescents in Kinshasa?	Very young adolescents (VYAs) aged 10–14 attending school in urban Kinshasa	10-14 years	Unmarried	Male / Female	Urban	Kinshasa	School	Quasi-experimental (non-randomized comparison group)	Moderate	Quantitative	Student surveys	Yes	Yes	2842	2842	1462 intervention, 1383 control	3.11	Difference-in-differences models, logistic regression, school fixed effects, clustering	Growing Up GREAT!	Multi-level SRH and gender transformative program using story-based curricula, community discussions, and caregiver/provider engagement	Adapted from the GREAT! model for younger urban students and school delivery	Group sessions, visual story cards, community dialogues	Trained peer facilitators, teachers, community leaders	6-month delivery, 8–10 group sessions	Schools and community venues	Social behavior change	Engaging men and boys, Social norms & networks, Small-group education, School-based education, Peer-led approaches	Knowledge	Knows where to get contraception (girls only - out of school)	Binary	Change over time (baseline - follow-up)	Individual	OR / AOR	Assigned to receive intervention vs. control	N/A	N/A	2.59	1.26-5.32	<.01	Significant (p<.05)	Positive	N/A	N/A	N/A
Gichangi et al. (2022)	Busting contraception myths and misconceptions among youth in Kwale County, Kenya: results of a digital health randomised control trial	2022	BMJ Open	Kenya	Does an SMS-based digital intervention reduce belief in contraception myths among youth aged 18–24 in Kenya?	Youth aged 18–24, literate, with mobile phone access and SMS capability in Kwale County	18-24 years	Mixed	Male / Female	Rural	Kwale County	General population	Randomized controlled trial (RCT)	Strong	Quantitative	Interviewer-administered surveys	Yes	Yes	740	740	255 intervention/on-demand; 249 contact/push; 236 control	0.16	Difference-in-differences using generalized linear model with identity link (linear probability)	ARMADILLO SMS initiative	Youth-targeted mobile phone–based intervention delivering 16 weekly audio messages via IVR to dispel contraception myths and misconceptions, aligned with national FP messaging guidelines. Contact arm received the same amount of messages but were not health specific.	Developed through focus groups and literature identifying 10 myths, including young people	Mobile-based IVR messaging	Kenya Ministry of Health, and communications company (Well Told Story)	16 weekly audio messages	Mobile phones	Social behavior change	Digitial technology	Knowledge	Contraception myths and misconceptions believed	Continuous	Baseline and endline	Individual	Mean diff (pre vs. post)	Assigned to receive intervention	N/A	N/A	-0.111	-17.1%- -5.2%	Not reported	Significant (p<.05)	Negative	N/A	N/A	N/A
Gichangi et al. (2022)	Busting contraception myths and misconceptions among youth in Kwale County, Kenya: results of a digital health randomised control trial	2022	BMJ Open	Kenya	Does an SMS-based digital intervention reduce belief in contraception myths among youth aged 18–24 in Kenya?	Youth aged 18–24, literate, with mobile phone access and SMS capability in Kwale County	18-24 years	Mixed	Male / Female	Rural	Kwale County	General population	Randomized controlled trial (RCT)	Strong	Quantitative	Interviewer-administered surveys	Yes	Yes	740	740	256 intervention/on-demand; 249 contact/push; 236 control	1.16	Difference-in-differences using generalized linear model with identity link (linear probability)	ARMADILLO SMS initiative	Youth-targeted mobile phone–based intervention delivering 16 weekly audio messages via IVR to dispel contraception myths and misconceptions, aligned with national FP messaging guidelines. Contact arm received the same amount of messages but were not health specific.	Developed through focus groups and literature identifying 10 myths, including young people	Mobile-based IVR messaging	Kenya Ministry of Health, and communications company (Well Told Story)	17 weekly audio messages	Mobile phones	Social behavior change	Digitial technology	Knowledge	Contraception myths and misconceptions believed	Continuous	Baseline and endline	Individual	Mean diff (pre vs. post)	Assigned to receive contact	N/A	N/A	-0.144	-20.5%- - 8.4%	Not reported	Significant (p<.05)	Negative	N/A	N/A	N/A
Gichangi et al. (2022)	Busting contraception myths and misconceptions among youth in Kwale County, Kenya: results of a digital health randomised control trial	2022	BMJ Open	Kenya	Does an SMS-based digital intervention reduce belief in contraception myths among youth aged 18–24 in Kenya?	Youth aged 18–24, literate, with mobile phone access and SMS capability in Kwale County	18-24 years	Mixed	Male / Female	Rural	Kwale County	General population	Randomized controlled trial (RCT)	Strong	Quantitative	Interviewer-administered surveys	Yes	Yes	740	740	257 intervention/on-demand; 249 contact/push; 236 control	2.16	Difference-in-differences using generalized linear model with identity link (linear probability)	ARMADILLO SMS initiative	Youth-targeted mobile phone–based intervention delivering 16 weekly audio messages via IVR to dispel contraception myths and misconceptions, aligned with national FP messaging guidelines. Contact arm received the same amount of messages but were not health specific.	Developed through focus groups and literature identifying 10 myths, including young people	Mobile-based IVR messaging	Kenya Ministry of Health, and communications company (Well Told Story)	18 weekly audio messages	Mobile phones	Social behavior change	Digitial technology	Knowledge	Contraception myths and misconceptions believed	Continuous	Baseline and endline	Individual	Mean diff (pre vs. post)	Assigned to receive control	N/A	N/A	-0.113	-17.4%- - 5.2%	Not reported	Significant (p<.05)	Negative	N/A	N/A	N/A
Gichangi et al. (2022)	Busting contraception myths and misconceptions among youth in Kwale County, Kenya: results of a digital health randomised control trial	2022	BMJ Open	Kenya	Does an SMS-based digital intervention reduce belief in contraception myths among youth aged 18–24 in Kenya?	Youth aged 18–24, literate, with mobile phone access and SMS capability in Kwale County	18-24 years	Mixed	Male / Female	Rural	Kwale County	General population	Randomized controlled trial (RCT)	Strong	Quantitative	Interviewer-administered surveys	Yes	Yes	740	740	258 intervention/on-demand; 249 contact/push; 236 control	3.16	Difference-in-differences using generalized linear model with identity link (linear probability)	ARMADILLO SMS initiative	Youth-targeted mobile phone–based intervention delivering 16 weekly audio messages via IVR to dispel contraception myths and misconceptions, aligned with national FP messaging guidelines. Contact arm received the same amount of messages but were not health specific.	Developed through focus groups and literature identifying 10 myths, including young people	Mobile-based IVR messaging	Kenya Ministry of Health, and communications company (Well Told Story)	19 weekly audio messages	Mobile phones	Social behavior change	Digitial technology	Knowledge	Contraception myths and misconceptions believed	Continuous	Baseline and endline (did)	Individual	Mean diff (DiD)	Assigned to receive intervention vs. control	N/A	N/A	0.002	-8.3% - 8.7%	Not reported	Null (p>.1)	Null	N/A	N/A	N/A
Gichangi et al. (2022)	Busting contraception myths and misconceptions among youth in Kwale County, Kenya: results of a digital health randomised control trial	2022	BMJ Open	Kenya	Does an SMS-based digital intervention reduce belief in contraception myths among youth aged 18–24 in Kenya?	Youth aged 18–24, literate, with mobile phone access and SMS capability in Kwale County	18-24 years	Mixed	Male / Female	Rural	Kwale County	General population	Randomized controlled trial (RCT)	Strong	Quantitative	Interviewer-administered surveys	Yes	Yes	740	740	259 intervention/on-demand; 249 contact/push; 236 control	4.16	Difference-in-differences using generalized linear model with identity link (linear probability)	ARMADILLO SMS initiative	Youth-targeted mobile phone–based intervention delivering 16 weekly audio messages via IVR to dispel contraception myths and misconceptions, aligned with national FP messaging guidelines. Contact arm received the same amount of messages but were not health specific.	Developed through focus groups and literature identifying 10 myths, including young people	Mobile-based IVR messaging	Kenya Ministry of Health, and communications company (Well Told Story)	20 weekly audio messages	Mobile phones	Social behavior change	Digitial technology	Knowledge	Contraception myths and misconceptions believed	Continuous	Baseline and endline (did)	Individual	Mean diff (DiD)	Assigned to receive contact vs. control	N/A	N/A	-0.031	-11.7%- 5.4%	Not reported	Null (p>.1)	Null	N/A	N/A	N/A
Gichangi et al. (2022)	Busting contraception myths and misconceptions among youth in Kwale County, Kenya: results of a digital health randomised control trial	2022	BMJ Open	Kenya	Does an SMS-based digital intervention reduce belief in contraception myths among youth aged 18–24 in Kenya?	Youth aged 18–24, literate, with mobile phone access and SMS capability in Kwale County	18-24 years	Mixed	Male / Female	Rural	Kwale County	General population	Randomized controlled trial (RCT)	Strong	Quantitative	Interviewer-administered surveys	Yes	Yes	740	740	260 intervention/on-demand; 249 contact/push; 236 control	5.16	Difference-in-differences using generalized linear model with identity link (linear probability)	ARMADILLO SMS initiative	Youth-targeted mobile phone–based intervention delivering 16 weekly audio messages via IVR to dispel contraception myths and misconceptions, aligned with national FP messaging guidelines. Contact arm received the same amount of messages but were not health specific.	Developed through focus groups and literature identifying 10 myths, including young people	Mobile-based IVR messaging	Kenya Ministry of Health, and communications company (Well Told Story)	21 weekly audio messages	Mobile phones	Social behavior change	Digitial technology	Knowledge	Contraception myths and misconceptions believed	Continuous	Baseline and endline (did)	Individual	Mean diff (DiD)	Assigned to receive intervention vs. contact	N/A	N/A	0.033	-5.1%- 11.8%	Not reported	Null (p>.1)	Null	N/A	N/A	N/A
Hegdahl et al. (2022)	Effects of economic support, comprehensive sexuality education and community dialogue on sexual behaviour: Findings from a cluster-RCT among adolescent girls in rural Zambia	2022	Social Science & Medicine	Zambia	What are the effects of economic support alone or combined with comprehensive sexuality education (CSE) and community dialogue on adolescent girls' sexual behaviour, contraceptive use, and beliefs?	Grade 7 girls (~12–14 years) attending 157 rural schools across Zambia, recruited in 2016	12-14 years	Unmarried	Female	Rural	Rural Zambia	School	Cluster randomized controlled trial (RCT)	Strong	Quantitative	Interviewer-administered surveys	Yes	Yes	4922	4922	999 control, 2,004 economic, 1,919 combined	0.11	GEE for cluster data, adjusted RRs and RDs	N/A	Economic support alone & in combination with CSE and community dialogues; Economic support: Unconditional cash to girls/guardians + school fees for Grades 8–9; CSE + community dialogue (combined arm): Youth clubs in schools teaching CSE + periodic community dialogue meetings focusing on fertility, marriage and girls’ schooling	Not reported	Cash transfers via guardians; in-person CSE sessions; structured meetings between schools, families, and community members	Research team with Ministry of Education & local facilitators	27-month intervention (2016–2018) + 24-month follow-up (2019)	Schools and community-based	Social behavior change	Social norms & networks, Financial incentives, Small-group education, School-based education	Other	Sexual activity past 4 weeks	Binary	Endline	Individual	RR / ARR	Economic vs. control	N/A	N/A	0.7	0.54-0.91	Not reported	Significant (p<.05)	Negative	N/A	N/A	N/A
Hegdahl et al. (2022)	Effects of economic support, comprehensive sexuality education and community dialogue on sexual behaviour: Findings from a cluster-RCT among adolescent girls in rural Zambia	2022	Social Science & Medicine	Zambia	What are the effects of economic support alone or combined with comprehensive sexuality education (CSE) and community dialogue on adolescent girls' sexual behaviour, contraceptive use, and beliefs?	Grade 7 girls (~12–14 years) attending 157 rural schools across Zambia, recruited in 2017	12-14 years	Unmarried	Female	Rural	Rural Zambia	School	Cluster randomized controlled trial (RCT)	Strong	Quantitative	Interviewer-administered surveys	Yes	Yes	4922	4922	1000 control, 2,004 economic, 1,919 combined	1.11	GEE for cluster data, adjusted RRs and RDs	N/A	Economic support alone & in combination with CSE and community dialogues; Economic support: Unconditional cash to girls/guardians + school fees for Grades 8–9; CSE + community dialogue (combined arm): Youth clubs in schools teaching CSE + periodic community dialogue meetings focusing on fertility, marriage and girls’ schooling	Not reported	Cash transfers via guardians; in-person CSE sessions; structured meetings between schools, families, and community members	Research team with Ministry of Education & local facilitators	27-month intervention (2016–2018) + 24-month follow-up (2019)	Schools and community-based	Social behavior change	Social norms & networks, Financial incentives, Small-group education, School-based education	Other	Sexual activity past 4 weeks	Binary	Endline	Individual	RR / ARR	Combined vs. control	N/A	N/A	0.59	0.46-0.75	Not reported	Significant (p<.05)	Negative	N/A	N/A	N/A
Hegdahl et al. (2022)	Effects of economic support, comprehensive sexuality education and community dialogue on sexual behaviour: Findings from a cluster-RCT among adolescent girls in rural Zambia	2022	Social Science & Medicine	Zambia	What are the effects of economic support alone or combined with comprehensive sexuality education (CSE) and community dialogue on adolescent girls' sexual behaviour, contraceptive use, and beliefs?	Grade 7 girls (~12–14 years) attending 157 rural schools across Zambia, recruited in 2018	12-14 years	Unmarried	Female	Rural	Rural Zambia	School	Cluster randomized controlled trial (RCT)	Strong	Quantitative	Interviewer-administered surveys	Yes	Yes	4922	4922	1001 control, 2,004 economic, 1,919 combined	2.11	GEE for cluster data, adjusted RRs and RDs	N/A	Economic support alone & in combination with CSE and community dialogues; Economic support: Unconditional cash to girls/guardians + school fees for Grades 8–9; CSE + community dialogue (combined arm): Youth clubs in schools teaching CSE + periodic community dialogue meetings focusing on fertility, marriage and girls’ schooling	Not reported	Cash transfers via guardians; in-person CSE sessions; structured meetings between schools, families, and community members	Research team with Ministry of Education & local facilitators	27-month intervention (2016–2018) + 24-month follow-up (2019)	Schools and community-based	Social behavior change	Social norms & networks, Financial incentives, Small-group education, School-based education	Contraceptive uptake/use	Current contraceptive use	Binary	Endline	Individual	RR / ARR	Economic vs. control	N/A	N/A	0.9	0.74-1.11	Not reported	Null (p>.1)	Null	N/A	N/A	N/A
Hegdahl et al. (2022)	Effects of economic support, comprehensive sexuality education and community dialogue on sexual behaviour: Findings from a cluster-RCT among adolescent girls in rural Zambia	2022	Social Science & Medicine	Zambia	What are the effects of economic support alone or combined with comprehensive sexuality education (CSE) and community dialogue on adolescent girls' sexual behaviour, contraceptive use, and beliefs?	Grade 7 girls (~12–14 years) attending 157 rural schools across Zambia, recruited in 2019	12-14 years	Unmarried	Female	Rural	Rural Zambia	School	Cluster randomized controlled trial (RCT)	Strong	Quantitative	Interviewer-administered surveys	Yes	Yes	4922	4922	1002 control, 2,004 economic, 1,919 combined	3.11	GEE for cluster data, adjusted RRs and RDs	N/A	Economic support alone & in combination with CSE and community dialogues; Economic support: Unconditional cash to girls/guardians + school fees for Grades 8–9; CSE + community dialogue (combined arm): Youth clubs in schools teaching CSE + periodic community dialogue meetings focusing on fertility, marriage and girls’ schooling	Not reported	Cash transfers via guardians; in-person CSE sessions; structured meetings between schools, families, and community members	Research team with Ministry of Education & local facilitators	27-month intervention (2016–2018) + 24-month follow-up (2019)	Schools and community-based	Social behavior change	Social norms & networks, Financial incentives, Small-group education, School-based education	Contraceptive uptake/use	Current contraceptive use	Binary	Endline	Individual	RR / ARR	Combined vs. control	N/A	N/A	1.14	0.95-1.37	Not reported	Marginally significant (p<.1)	Positive	N/A	N/A	N/A
Hegdahl et al. (2022)	Effects of economic support, comprehensive sexuality education and community dialogue on sexual behaviour: Findings from a cluster-RCT among adolescent girls in rural Zambia	2022	Social Science & Medicine	Zambia	What are the effects of economic support alone or combined with comprehensive sexuality education (CSE) and community dialogue on adolescent girls' sexual behaviour, contraceptive use, and beliefs?	Grade 7 girls (~12–14 years) attending 157 rural schools across Zambia, recruited in 2020	12-14 years	Unmarried	Female	Rural	Rural Zambia	School	Cluster randomized controlled trial (RCT)	Strong	Quantitative	Interviewer-administered surveys	Yes	Yes	4922	4922	1003 control, 2,004 economic, 1,919 combined	4.11	GEE for cluster data, adjusted RRs and RDs	N/A	Economic support alone & in combination with CSE and community dialogues; Economic support: Unconditional cash to girls/guardians + school fees for Grades 8–9; CSE + community dialogue (combined arm): Youth clubs in schools teaching CSE + periodic community dialogue meetings focusing on fertility, marriage and girls’ schooling	Not reported	Cash transfers via guardians; in-person CSE sessions; structured meetings between schools, families, and community members	Research team with Ministry of Education & local facilitators	27-month intervention (2016–2018) + 24-month follow-up (2019)	Schools and community-based	Social behavior change	Social norms & networks, Financial incentives, Small-group education, School-based education	Knowledge	Good knowledge of modern contraceptive methods	Binary	Endline	Individual	RR / ARR	Economic vs. control	N/A	N/A	0.99	0.80-1.22	Not reported	Null (p>.1)	Null	N/A	N/A	N/A
Hegdahl et al. (2022)	Effects of economic support, comprehensive sexuality education and community dialogue on sexual behaviour: Findings from a cluster-RCT among adolescent girls in rural Zambia	2022	Social Science & Medicine	Zambia	What are the effects of economic support alone or combined with comprehensive sexuality education (CSE) and community dialogue on adolescent girls' sexual behaviour, contraceptive use, and beliefs?	Grade 7 girls (~12–14 years) attending 157 rural schools across Zambia, recruited in 2021	12-14 years	Unmarried	Female	Rural	Rural Zambia	School	Cluster randomized controlled trial (RCT)	Strong	Quantitative	Interviewer-administered surveys	Yes	Yes	4922	4922	1004 control, 2,004 economic, 1,919 combined	5.11	GEE for cluster data, adjusted RRs and RDs	N/A	Economic support alone & in combination with CSE and community dialogues; Economic support: Unconditional cash to girls/guardians + school fees for Grades 8–9; CSE + community dialogue (combined arm): Youth clubs in schools teaching CSE + periodic community dialogue meetings focusing on fertility, marriage and girls’ schooling	Not reported	Cash transfers via guardians; in-person CSE sessions; structured meetings between schools, families, and community members	Research team with Ministry of Education & local facilitators	27-month intervention (2016–2018) + 24-month follow-up (2019)	Schools and community-based	Social behavior change	Social norms & networks, Financial incentives, Small-group education, School-based education	Knowledge	Good knowledge of modern contraceptive methods	Binary	Endline	Individual	RR / ARR	Combined vs. control	N/A	N/A	1.16	0.94-1.43	Not reported	Marginally significant (p<.1)	Positive	N/A	N/A	N/A
Hinson et al. (2023)	Does a school-based intervention increase girls’ sexual and reproductive health attitudes and intentions? Results from a mixed-methods cluster-randomized trial in Burkina Faso	2023	PLOS Global Public Health	Burkina Faso	Does a school-based intervention improve sexual and reproductive health (SRH) attitudes and intentions among adolescent girls?	In-school adolescent girls in grades 9 and 10 in rural Burkina Faso	14-18 years	Unmarried	Female	Rural	Boucle du Mouhoun	School	Cluster randomized controlled trial (RCT)	Strong	Mixed Methods	Primary survey data and qualitative in-depth interviews with girls in the intervention gropu at baseline (n=41) and endline (n=48) and implementation staff (n=35 and experts (n=14) at endline	Yes	Yes	2372	2372	1172 intervention; 1200 control	0.13	Difference-in-differences with generalized estimating equations (GEE) analysis.	(re)solve intervention	Participatory, activity-based sexual and reproductive health curriculum which included a school-based participatory board game (la chance), a health facility passport, and posters/name tags	Based on national SRH curriculum, co-designed with local stakeholders, adapted for young adolescents	in-person group sessions	Community-based facilitators	Unclear - implied that they played boardgame at least once	Schools and participating health facilities	Social behavior change	School-based education, Adolescent-responsive services	Intention/desire/demand	Intention to use contraception in the next 3 months	Binary	Endline (7 months post intervention)	Individual	OR / AOR	Assigned to intervention vs. control (all girls)	N/A	N/A	1.59	0.97-2.61	Not reported	Marginally significant (p<.1)	Positive	N/A	N/A	N/A
Hinson et al. (2023)	Does a school-based intervention increase girls’ sexual and reproductive health attitudes and intentions? Results from a mixed-methods cluster-randomized trial in Burkina Faso	2023	PLOS Global Public Health	Burkina Faso	Does a school-based intervention improve sexual and reproductive health (SRH) attitudes and intentions among adolescent girls?	In-school adolescent girls in grades 9 and 10 in rural Burkina Faso	14-18 years	Unmarried	Female	Rural	Boucle du Mouhoun	School	Cluster randomized controlled trial (RCT)	Strong	Mixed Methods	Primary survey data and qualitative in-depth interviews with girls in the intervention gropu at baseline (n=41) and endline (n=48) and implementation staff (n=35 and experts (n=14) at endline	Yes	Yes	2372	2372	1173 intervention; 1200 control	1.13	Difference-in-differences with generalized estimating equations (GEE) analysis.	(re)solve intervention	Participatory, activity-based sexual and reproductive health curriculum which included a school-based participatory board game (la chance), a health facility passport, and posters/name tags	Based on national SRH curriculum, co-designed with local stakeholders, adapted for young adolescents	in-person group sessions	Community-based facilitators	Unclear - implied that they played boardgame at least once	Schools and participating health facilities	Social behavior change	School-based education, Adolescent-responsive services	Intention/desire/demand	Intention to use contraception in the next 3 months	Binary	Endline (7 months post intervention)	Individual	OR / AOR	Assigned to intervention vs. control (Ever sexually active)	N/A	N/A	1.43	0.79-2.59	Not reported	Null (p>.1)	Null	N/A	N/A	N/A
Hinson et al. (2023)	Does a school-based intervention increase girls’ sexual and reproductive health attitudes and intentions? Results from a mixed-methods cluster-randomized trial in Burkina Faso	2023	PLOS Global Public Health	Burkina Faso	Does a school-based intervention improve sexual and reproductive health (SRH) attitudes and intentions among adolescent girls?	In-school adolescent girls in grades 9 and 10 in rural Burkina Faso	14-18 years	Unmarried	Female	Rural	Boucle du Mouhoun	School	Cluster randomized controlled trial (RCT)	Strong	Mixed Methods	Primary survey data and qualitative in-depth interviews with girls in the intervention gropu at baseline (n=41) and endline (n=48) and implementation staff (n=35 and experts (n=14) at endline	Yes	Yes	2372	2372	1174 intervention; 1200 control	2.13	Difference-in-differences with generalized estimating equations (GEE) analysis.	(re)solve intervention	Participatory, activity-based sexual and reproductive health curriculum which included a school-based participatory board game (la chance), a health facility passport, and posters/name tags	Based on national SRH curriculum, co-designed with local stakeholders, adapted for young adolescents	in-person group sessions	Community-based facilitators	Unclear - implied that they played boardgame at least once	Schools and participating health facilities	Social behavior change	School-based education, Adolescent-responsive services	Intention/desire/demand	Intention to use contraception in the next 3 months	Binary	Endline (7 months post intervention)	Individual	OR / AOR	Assigned to intervention vs. control (Never sexually active)	N/A	N/A	1.8	0.95-3.42	Not reported	Marginally significant (p<.1)	Positive	N/A	N/A	N/A
Hinson et al. (2023)	Does a school-based intervention increase girls’ sexual and reproductive health attitudes and intentions? Results from a mixed-methods cluster-randomized trial in Burkina Faso	2023	PLOS Global Public Health	Burkina Faso	Does a school-based intervention improve sexual and reproductive health (SRH) attitudes and intentions among adolescent girls?	In-school adolescent girls in grades 9 and 10 in rural Burkina Faso	14-18 years	Unmarried	Female	Rural	Boucle du Mouhoun	School	Cluster randomized controlled trial (RCT)	Strong	Mixed Methods	Primary survey data and qualitative in-depth interviews with girls in the intervention gropu at baseline (n=41) and endline (n=48) and implementation staff (n=35 and experts (n=14) at endline	Yes	Yes	2372	2372	1175 intervention; 1200 control	3.13	Difference-in-differences with generalized estimating equations (GEE) analysis.	(re)solve intervention	Participatory, activity-based sexual and reproductive health curriculum which included a school-based participatory board game (la chance), a health facility passport, and posters/name tags	Based on national SRH curriculum, co-designed with local stakeholders, adapted for young adolescents	in-person group sessions	Community-based facilitators	Unclear - implied that they played boardgame at least once	Schools and participating health facilities	Social behavior change	School-based education, Adolescent-responsive services	Intention/desire/demand	Intention to use contraception in the next 3 months	Binary	Endline (7 months post intervention)	Individual	OR / AOR	Assigned to intervention vs. control (girls who went to health facility)	N/A	N/A	2.02	1.08-3.77	Not reported	Significant (p<.05)	Positive	N/A	N/A	N/A
Hinson et al. (2023)	Does a school-based intervention increase girls’ sexual and reproductive health attitudes and intentions? Results from a mixed-methods cluster-randomized trial in Burkina Faso	2023	PLOS Global Public Health	Burkina Faso	Does a school-based intervention improve sexual and reproductive health (SRH) attitudes and intentions among adolescent girls?	In-school adolescent girls in grades 9 and 10 in rural Burkina Faso	14-18 years	Unmarried	Female	Rural	Boucle du Mouhoun	School	Cluster randomized controlled trial (RCT)	Strong	Mixed Methods	Primary survey data and qualitative in-depth interviews with girls in the intervention gropu at baseline (n=41) and endline (n=48) and implementation staff (n=35 and experts (n=14) at endline	Yes	Yes	2372	2372	1176 intervention; 1200 control	4.13	Difference-in-differences with generalized estimating equations (GEE) analysis.	(re)solve intervention	Participatory, activity-based sexual and reproductive health curriculum which included a school-based participatory board game (la chance), a health facility passport, and posters/name tags	Based on national SRH curriculum, co-designed with local stakeholders, adapted for young adolescents	in-person group sessions	Community-based facilitators	Unclear - implied that they played boardgame at least once	Schools and participating health facilities	Social behavior change	School-based education, Adolescent-responsive services	Intention/desire/demand	Intention to use contraception in the next 3 months	Binary	Endline (7 months post intervention)	Individual	OR / AOR	Assigned to intervention vs. control (girls who did not go to a health facility)	N/A	N/A	1.3	0.79-2.14	Not reported	Null (p>.1)	Null	N/A	N/A	N/A
Hinson et al. (2023)	Does a school-based intervention increase girls’ sexual and reproductive health attitudes and intentions? Results from a mixed-methods cluster-randomized trial in Burkina Faso	2023	PLOS Global Public Health	Burkina Faso	Does a school-based intervention improve sexual and reproductive health (SRH) attitudes and intentions among adolescent girls?	In-school adolescent girls in grades 9 and 10 in rural Burkina Faso	14-18 years	Unmarried	Female	Rural	Boucle du Mouhoun	School	Cluster randomized controlled trial (RCT)	Strong	Mixed Methods	Primary survey data and qualitative in-depth interviews with girls in the intervention gropu at baseline (n=41) and endline (n=48) and implementation staff (n=35 and experts (n=14) at endline	Yes	Yes	2372	2372	1177 intervention; 1200 control	5.13	Difference-in-differences with generalized estimating equations (GEE) analysis.	(re)solve intervention	Participatory, activity-based sexual and reproductive health curriculum which included a school-based participatory board game (la chance), a health facility passport, and posters/name tags	Based on national SRH curriculum, co-designed with local stakeholders, adapted for young adolescents	in-person group sessions	Community-based facilitators	Unclear - implied that they played boardgame at least once	Schools and participating health facilities	Social behavior change	School-based education, Adolescent-responsive services	Intention/desire/demand	Intention to use contraception in the next 3 months	Binary	Endline (7 months post intervention)	Individual	OR / AOR	Assigned to intervention vs. control (girls who were "near misses")	N/A	N/A	1.52	0.92-2.51	Not reported	Null (p>.1)	Null	N/A	N/A	N/A
Huda et al. (2019)	The Effect of a Club in Making Differences in Knowledge, Attitude, and Practices on Family Planning Among Married Adolescent Girls in Urban Slums in Bangladesh	2019	International Journal of Environmental Research and Public Health	Bangladesh	Does participation in a married adolescent girls’ club improve knowledge, attitudes, and contraceptive practices among married adolescent girls in urban slums of Dhaka?	Married adolescent girls, aged 14–19, living in four urban slums of Dhaka	14-19 years	Married	Female	Urban	Dhaka	Informal settlement/slum	Quasi-experimental (non-randomized comparison group)	Moderate	Quantitative	Post-only survey	No	Yes	1601	1601	799 intervention; 802 control	N/A	Logistic regression adjusted for demographic differences	Married Adolescent Girl (MAG) club	Monthly peer-group sessions covering family planning knowledge, male involvement, addressing myths/fear, and contraceptive method demonstrations over ~2 years	Developed by Government of Bangladesh and local non-governmental organizations (NGOs)	In-person peer-group meetings led by facilitators recruited from NGO Brac’s urban slum programs	Trained facilitators from current club leaders	Sessions held monthly between July 2014–August 2016 (approx. 24 meetings total)	Community-based clubs in two slums	Social behavior change	Small-group education	Contraceptive uptake/use	Current use of modern FP methods	Binary	Endline	Individual	OR / AOR	Assigned to intervention vs. control	N/A	N/A	1.77	Not reported	0.002	Significant (p<.05)	Positive	N/A	N/A	N/A
Huda et al. (2019)	The Effect of a Club in Making Differences in Knowledge, Attitude, and Practices on Family Planning Among Married Adolescent Girls in Urban Slums in Bangladesh	2019	International Journal of Environmental Research and Public Health	Bangladesh	Does participation in a married adolescent girls’ club improve knowledge, attitudes, and contraceptive practices among married adolescent girls in urban slums of Dhaka?	Married adolescent girls, aged 14–19, living in four urban slums of Dhaka	14-19 years	Married	Female	Urban	Dhaka	Informal settlement/slum	Quasi-experimental (non-randomized comparison group)	Moderate	Quantitative	Post-only survey	No	Yes	1601	1601	800 intervention; 802 control	N/A	Logistic regression adjusted for demographic differences	Married Adolescent Girl (MAG) club	Monthly peer-group sessions covering family planning knowledge, male involvement, addressing myths/fear, and contraceptive method demonstrations over ~2 years	Developed by Government of Bangladesh and local non-governmental organizations (NGOs)	In-person peer-group meetings led by facilitators recruited from NGO Brac’s urban slum programs	Trained facilitators from current club leaders	Sessions held monthly between July 2014–August 2016 (approx. 24 meetings total)	Community-based clubs in two slums	Social behavior change	Small-group education	Knowledge	Knows of modern methods of contraception	Binary	Endline	Individual	OR / AOR	Assigned to intervention vs. control	N/A	N/A	15.26	Not reported	<.0001	Significant (p<.05)	Positive	N/A	N/A	N/A
Huda et al. (2019)	The Effect of a Club in Making Differences in Knowledge, Attitude, and Practices on Family Planning Among Married Adolescent Girls in Urban Slums in Bangladesh	2019	International Journal of Environmental Research and Public Health	Bangladesh	Does participation in a married adolescent girls’ club improve knowledge, attitudes, and contraceptive practices among married adolescent girls in urban slums of Dhaka?	Married adolescent girls, aged 14–19, living in four urban slums of Dhaka	14-19 years	Married	Female	Urban	Dhaka	Informal settlement/slum	Quasi-experimental (non-randomized comparison group)	Moderate	Quantitative	Post-only survey	No	Yes	1601	1601	801 intervention; 802 control	N/A	Logistic regression adjusted for demographic differences	Married Adolescent Girl (MAG) club	Monthly peer-group sessions covering family planning knowledge, male involvement, addressing myths/fear, and contraceptive method demonstrations over ~2 years	Developed by Government of Bangladesh and local non-governmental organizations (NGOs)	In-person peer-group meetings led by facilitators recruited from NGO Brac’s urban slum programs	Trained facilitators from current club leaders	Sessions held monthly between July 2014–August 2016 (approx. 24 meetings total)	Community-based clubs in two slums	Social behavior change	Small-group education	Knowledge	Consequences of early pregnancy properly identified	Binary	Endline	Individual	OR / AOR	Assigned to intervention vs. control	N/A	N/A	3.41	Not reported	<.0001	Significant (p<.05)	Positive	N/A	N/A	N/A
Huda et al. (2019)	The Effect of a Club in Making Differences in Knowledge, Attitude, and Practices on Family Planning Among Married Adolescent Girls in Urban Slums in Bangladesh	2019	International Journal of Environmental Research and Public Health	Bangladesh	Does participation in a married adolescent girls’ club improve knowledge, attitudes, and contraceptive practices among married adolescent girls in urban slums of Dhaka?	Married adolescent girls, aged 14–19, living in four urban slums of Dhaka	14-19 years	Married	Female	Urban	Dhaka	Informal settlement/slum	Quasi-experimental (non-randomized comparison group)	Moderate	Quantitative	Post-only survey	No	Yes	1601	1601	802 intervention; 802 control	N/A	Logistic regression adjusted for demographic differences	Married Adolescent Girl (MAG) club	Monthly peer-group sessions covering family planning knowledge, male involvement, addressing myths/fear, and contraceptive method demonstrations over ~2 years	Developed by Government of Bangladesh and local non-governmental organizations (NGOs)	In-person peer-group meetings led by facilitators recruited from NGO Brac’s urban slum programs	Trained facilitators from current club leaders	Sessions held monthly between July 2014–August 2016 (approx. 24 meetings total)	Community-based clubs in two slums	Social behavior change	Small-group education	Communication	Discussed FP with husband	Binary	Endline	Individual	OR / AOR	Assigned to intervention vs. control	N/A	N/A	7.45	Not reported	<.0001	Significant (p<.05)	Positive	N/A	N/A	N/A
Huda et al. (2019)	The Effect of a Club in Making Differences in Knowledge, Attitude, and Practices on Family Planning Among Married Adolescent Girls in Urban Slums in Bangladesh	2019	International Journal of Environmental Research and Public Health	Bangladesh	Does participation in a married adolescent girls’ club improve knowledge, attitudes, and contraceptive practices among married adolescent girls in urban slums of Dhaka?	Married adolescent girls, aged 14–19, living in four urban slums of Dhaka	14-19 years	Married	Female	Urban	Dhaka	Informal settlement/slum	Quasi-experimental (non-randomized comparison group)	Moderate	Quantitative	Post-only survey	No	Yes	1601	1601	803 intervention; 802 control	N/A	Logistic regression adjusted for demographic differences	Married Adolescent Girl (MAG) club	Monthly peer-group sessions covering family planning knowledge, male involvement, addressing myths/fear, and contraceptive method demonstrations over ~2 years	Developed by Government of Bangladesh and local non-governmental organizations (NGOs)	In-person peer-group meetings led by facilitators recruited from NGO Brac’s urban slum programs	Trained facilitators from current club leaders	Sessions held monthly between July 2014–August 2016 (approx. 24 meetings total)	Community-based clubs in two slums	Social behavior change	Small-group education	Attitudes	Supports using FP	Binary	Endline	Individual	OR / AOR	Assigned to intervention vs. control	N/A	N/A	6.55	Not reported	<.0001	Significant (p<.05)	Positive	N/A	N/A	N/A
Huda et al. (2019)	The Effect of a Club in Making Differences in Knowledge, Attitude, and Practices on Family Planning Among Married Adolescent Girls in Urban Slums in Bangladesh	2019	International Journal of Environmental Research and Public Health	Bangladesh	Does participation in a married adolescent girls’ club improve knowledge, attitudes, and contraceptive practices among married adolescent girls in urban slums of Dhaka?	Married adolescent girls, aged 14–19, living in four urban slums of Dhaka	14-19 years	Married	Female	Urban	Dhaka	Informal settlement/slum	Quasi-experimental (non-randomized comparison group)	Moderate	Quantitative	Post-only survey	No	Yes	1601	1601	804 intervention; 802 control	N/A	Logistic regression adjusted for demographic differences	Married Adolescent Girl (MAG) club	Monthly peer-group sessions covering family planning knowledge, male involvement, addressing myths/fear, and contraceptive method demonstrations over ~2 years	Developed by Government of Bangladesh and local non-governmental organizations (NGOs)	In-person peer-group meetings led by facilitators recruited from NGO Brac’s urban slum programs	Trained facilitators from current club leaders	Sessions held monthly between July 2014–August 2016 (approx. 24 meetings total)	Community-based clubs in two slums	Social behavior change	Small-group education	Norms/approval	Husband supports using FP	Binary	Endline	Individual	OR / AOR	Assigned to intervention vs. control	N/A	N/A	3.96	Not reported	<.0001	Significant (p<.05)	Positive	N/A	N/A	N/A
Huda et al. (2019)	The Effect of a Club in Making Differences in Knowledge, Attitude, and Practices on Family Planning Among Married Adolescent Girls in Urban Slums in Bangladesh	2019	International Journal of Environmental Research and Public Health	Bangladesh	Does participation in a married adolescent girls’ club improve knowledge, attitudes, and contraceptive practices among married adolescent girls in urban slums of Dhaka?	Married adolescent girls, aged 14–19, living in four urban slums of Dhaka	14-19 years	Married	Female	Urban	Dhaka	Informal settlement/slum	Quasi-experimental (non-randomized comparison group)	Moderate	Quantitative	Post-only survey	No	Yes	1601	1601	805 intervention; 802 control	N/A	Logistic regression adjusted for demographic differences	Married Adolescent Girl (MAG) club	Monthly peer-group sessions covering family planning knowledge, male involvement, addressing myths/fear, and contraceptive method demonstrations over ~2 years	Developed by Government of Bangladesh and local non-governmental organizations (NGOs)	In-person peer-group meetings led by facilitators recruited from NGO Brac’s urban slum programs	Trained facilitators from current club leaders	Sessions held monthly between July 2014–August 2016 (approx. 24 meetings total)	Community-based clubs in two slums	Social behavior change	Small-group education	Attitudes	FP is a joint responsibility of husband and wife	Binary	Endline	Individual	OR / AOR	Assigned to intervention vs. control	N/A	N/A	3.43	Not reported	<.0001	Significant (p<.05)	Positive	N/A	N/A	N/A
Jacobs et al. (2017)	Mass media exposure and modern contraceptive use among married West African adolescents	2017	The European Journal of Contraception & Reproductive Health Care	Burkina Faso, Senegal	Is exposure to family planning messaging via mass media associated with modern contraceptive use, knowledge, and intentions among married adolescent women (15–19) in Burkina Faso and Senegal?	Married adolescent women aged 15–19	15-19 years	Married	Female	Urban, Rural	National DHS samples	General population	Cross-sectional	Weak	Quantitative	DHS 2010	No	Yes	1957	1957	961 Burkina Faso; 996 Senegal	N/A	Chi-square tests for initial analysis, propensity score matching, and multivariable logistic regression models for subsequent analysis.	N/A	Exposed to FP messaging via radio, TV, newspaper, and/or print media	N/A	Radio, TV, newspaper, and/or print media	N/A	N/A	Individual/household	Social behavior change	Mass media	Contraceptive uptake/use	Current use of a modern method	Binary	N/A	Individual	OR / AOR	Exposed to FP messages vs. not exposed (Burkina Faso)	N/A	N/A	0.98	0.43-2.30	0.96	Null (p>.1)	Null	N/A	N/A	N/A
Jacobs et al. (2017)	Mass media exposure and modern contraceptive use among married West African adolescents	2017	The European Journal of Contraception & Reproductive Health Care	Burkina Faso, Senegal	Is exposure to family planning messaging via mass media associated with modern contraceptive use, knowledge, and intentions among married adolescent women (15–19) in Burkina Faso and Senegal?	Married adolescent women aged 15–20	15-19 years	Married	Female	Urban, Rural	National DHS samples	General population	Cross-sectional	Weak	Quantitative	DHS 2011	No	Yes	1957	1957	962 Burkina Faso; 996 Senegal	N/A	Chi-square tests for initial analysis, propensity score matching, and multivariable logistic regression models for subsequent analysis.	N/A	Exposed to FP messaging via radio, TV, newspaper, and/or print media	N/A	Radio, TV, newspaper, and/or print media	N/A	N/A	Individual/household	Social behavior change	Mass media	Contraceptive uptake/use	Current use of a modern method	Binary	N/A	Individual	OR / AOR	Exposed to FP messages vs. not exposed (Senegal)	N/A	N/A	2.3	0.92-5.73	0.07	Marginally significant (p<.1)	Positive	N/A	N/A	N/A
Jacobs et al. (2017)	Mass media exposure and modern contraceptive use among married West African adolescents	2017	The European Journal of Contraception & Reproductive Health Care	Burkina Faso, Senegal	Is exposure to family planning messaging via mass media associated with modern contraceptive use, knowledge, and intentions among married adolescent women (15–19) in Burkina Faso and Senegal?	Married adolescent women aged 15–21	15-19 years	Married	Female	Urban, Rural	National DHS samples	General population	Cross-sectional	Weak	Quantitative	DHS 2012	No	Yes	1957	1957	963 Burkina Faso; 996 Senegal	N/A	Chi-square tests for initial analysis, propensity score matching, and multivariable logistic regression models for subsequent analysis.	N/A	Exposed to FP messaging via radio, TV, newspaper, and/or print media	N/A	Radio, TV, newspaper, and/or print media	N/A	N/A	Individual/household	Social behavior change	Mass media	Intention/desire/demand	Intention to use FP in the future	Binary	N/A	Individual	OR / AOR	Exposed to FP messages vs. not exposed (Burkina Faso)	N/A	N/A	1.74	1.22-2.49	0.002	Significant (p<.05)	Positive	N/A	N/A	N/A
Jacobs et al. (2017)	Mass media exposure and modern contraceptive use among married West African adolescents	2017	The European Journal of Contraception & Reproductive Health Care	Burkina Faso, Senegal	Is exposure to family planning messaging via mass media associated with modern contraceptive use, knowledge, and intentions among married adolescent women (15–19) in Burkina Faso and Senegal?	Married adolescent women aged 15–22	15-19 years	Married	Female	Urban, Rural	National DHS samples	General population	Cross-sectional	Weak	Quantitative	DHS 2013	No	Yes	1957	1957	964 Burkina Faso; 996 Senegal	N/A	Chi-square tests for initial analysis, propensity score matching, and multivariable logistic regression models for subsequent analysis.	N/A	Exposed to FP messaging via radio, TV, newspaper, and/or print media	N/A	Radio, TV, newspaper, and/or print media	N/A	N/A	Individual/household	Social behavior change	Mass media	Intention/desire/demand	Intention to use FP in the future	Binary	N/A	Individual	OR / AOR	Exposed to FP messages vs. not exposed (Senegal)	N/A	N/A	1.74	0.92-3.28	0.09	Marginally significant (p<.1)	Positive	N/A	N/A	N/A
Jacobs et al. (2017)	Mass media exposure and modern contraceptive use among married West African adolescents	2017	The European Journal of Contraception & Reproductive Health Care	Burkina Faso, Senegal	Is exposure to family planning messaging via mass media associated with modern contraceptive use, knowledge, and intentions among married adolescent women (15–19) in Burkina Faso and Senegal?	Married adolescent women aged 15–23	15-19 years	Married	Female	Urban, Rural	National DHS samples	General population	Cross-sectional	Weak	Quantitative	DHS 2014	No	Yes	1957	1957	965 Burkina Faso; 996 Senegal	N/A	Chi-square tests for initial analysis, propensity score matching, and multivariable logistic regression models for subsequent analysis.	N/A	Exposed to FP messaging via radio, TV, newspaper, and/or print media	N/A	Radio, TV, newspaper, and/or print media	N/A	N/A	Individual/household	Social behavior change	Mass media	Knowledge	Knowledge of a modern method	Binary	N/A	Individual	OR / AOR	Exposed to FP messages vs. not exposed (Burkina Faso)	N/A	N/A	13.66	3.72-50.13	<.0001	Significant (p<.05)	Positive	N/A	N/A	N/A
Jacobs et al. (2017)	Mass media exposure and modern contraceptive use among married West African adolescents	2017	The European Journal of Contraception & Reproductive Health Care	Burkina Faso, Senegal	Is exposure to family planning messaging via mass media associated with modern contraceptive use, knowledge, and intentions among married adolescent women (15–19) in Burkina Faso and Senegal?	Married adolescent women aged 15–24	15-19 years	Married	Female	Urban, Rural	National DHS samples	General population	Cross-sectional	Weak	Quantitative	DHS 2015	No	Yes	1957	1957	966 Burkina Faso; 996 Senegal	N/A	Chi-square tests for initial analysis, propensity score matching, and multivariable logistic regression models for subsequent analysis.	N/A	Exposed to FP messaging via radio, TV, newspaper, and/or print media	N/A	Radio, TV, newspaper, and/or print media	N/A	N/A	Individual/household	Social behavior change	Mass media	Knowledge	Knowledge of a modern method	Binary	N/A	Individual	OR / AOR	Exposed to FP messages vs. not exposed (Senegal)	N/A	N/A	6.72	2.55-17.65	<.0001	Significant (p<.05)	Positive	N/A	N/A	N/A
Macharia et al. (2022)	An Unstructured Supplementary Service Data–Based mHealth App Providing On-Demand Sexual Reproductive Health Information for Adolescents in Kibra, Kenya: Randomized Controlled Trial	2022	JMIR Mhealth Uhealth	Kenya	Does an on-demand USSD-based mobile app improve adolescents’ SRH knowledge and decision-making?	Adolescents aged 15–19 living in Kibra, with access to a mobile phone	15-19 years	Not reported	Male / Female	Urban	Kibra	Informal settlement/slum	Randomized controlled trial (RCT)	Strong	Quantitative	Interviewer-administered surveys	Yes	Yes	300	300	146 intervention; 154 control	0.24	Paired sample t test and descriptive statistics using R software.	N/A	Unstructured Supplementary Service Data (USSD)–based appwith SRH information via Echomobile® platform	Designed based on health belief model in co-creation process with youth	mobile phone	N/A	Self-use app	Individual/household	Social behavior change	Digitial technology	Knowledge	SRH knowledge score	Continuous	Baseline, endline	Individual	Mean diff (pre vs. post)	Assigned to intervention or control	N/A	N/A	0.5	0.10-0.90	0.03	Significant (p<.05)	Positive	N/A	N/A	N/A
Macharia et al. (2022)	An Unstructured Supplementary Service Data–Based mHealth App Providing On-Demand Sexual Reproductive Health Information for Adolescents in Kibra, Kenya: Randomized Controlled Trial	2022	JMIR Mhealth Uhealth	Kenya	Does an on-demand USSD-based mobile app improve adolescents’ SRH knowledge and decision-making?	Adolescents aged 15–19 living in Kibra, with access to a mobile phone	15-19 years	Not reported	Male / Female	Urban	Kibra	Informal settlement/slum	Randomized controlled trial (RCT)	Strong	Quantitative	Interviewer-administered surveys	Yes	Yes	300	300	147 intervention; 154 control	1.24	Paired sample t test and descriptive statistics using R software.	N/A	Unstructured Supplementary Service Data (USSD)–based appwith SRH information via Echomobile® platform	Designed based on health belief model in co-creation process with youth	mobile phone	N/A	Self-use app	Individual/household	Social behavior change	Digitial technology	Knowledge	Contraceptive knowledge score	Continuous	Baseline, endline	Individual	Mean diff (pre vs. post)	Assigned to intervention or control	N/A	N/A	0.36	0.06-.65	0.06	Marginally significant (p<.1)	Positive	N/A	N/A	N/A
Makenzius et al. (2023)	A stigma-reduction intervention targeting abortion and contraceptive use among adolescents in Kisumu County, Kenya: a quasi-experimental study	2023	Sexual and Reproductive Health Matters	Kenya	Does a school-based stigma-reduction programme reduce stigmatising attitudes towards abortion and contraceptive use among secondary school students?	Mixed-gender secondary-school students, ages ~14–20	14-20 years	Not reported	Male / Female	Peri-urban	Kisumu	School	Quasi-experimental (non-randomized comparison group)	Moderate	Quantitative	Interviewer-administered surveys	Yes	Yes	1368	1368	644 intervention; 724 control	0.12	Descriptive statistics, t-tests, repeated-measures ANOVA, interclass correlation, Cronbach alpha coefficients, and paired-sample t-tests.	N/A	School-based stigma-reduction program promoting gender equiality, equitable norms, value clarification targeting stigma around abortion and contraceptive use	Not reported	In-person group sessions	Trained facilitators, including teachers and peer-educators, in classroom settings	delivered over 3 weeks (8-9 hours) divided into four sessions and provided to mixed-gender classrooms	Schools	Social behavior change	School-based education, Peer-led approaches, Engaging men and boys	Attitudes	ASABA	Continuous	Baseline, 12-month endline	Individual	Mean diff (pre vs. post)	Time - pre to post, compared to control	N/A	N/A	-0.78	-0.85- -0.71	<.001	Yes	Negative	N/A	N/A	N/A
Makenzius et al. (2023)	A stigma-reduction intervention targeting abortion and contraceptive use among adolescents in Kisumu County, Kenya: a quasi-experimental study	2023	Sexual and Reproductive Health Matters	Kenya	Does a school-based stigma-reduction programme reduce stigmatising attitudes towards abortion and contraceptive use among secondary school students?	Mixed-gender secondary-school students, ages ~14–21	14-20 years	Not reported	Male / Female	Peri-urban	Kisumu	School	Quasi-experimental (non-randomized comparison group)	Moderate	Quantitative	Interviewer-administered surveys	Yes	Yes	1368	1368	645 intervention; 724 control	1.12	Descriptive statistics, t-tests, repeated-measures ANOVA, interclass correlation, Cronbach alpha coefficients, and paired-sample t-tests.	N/A	School-based stigma-reduction program promoting gender equiality, equitable norms, value clarification targeting stigma around abortion and contraceptive use	Not reported	In-person group sessions	Trained facilitators, including teachers and peer-educators, in classroom settings	delivered over 3 weeks (8-9 hours) divided into four sessions and provided to mixed-gender classrooms	Schools	Social behavior change	School-based education, Peer-led approaches, Engaging men and boys	Attitudes	CUS	Continuous	Baseline, 12-month endline	Individual	Mean diff (pre vs. post)	Time - pre to post, compared to control	N/A	N/A	-0.73	-0.83- - 0.63	<.001	Yes	Negative	N/A	N/A	N/A
Morgan et al. (2020)	Effects of a Community-Based Program on Voluntary Modern Contraceptive Uptake Among Young First-Time Parents in Cross River State, Nigeria	2020	Global Health: Science and Practice	Nigeria	Does the community-based support program increase modern contraceptive use among first-time parents aged 15–24?	Young first-time mothers and fathers (aged 15–24) with children <6 months, living in Cross River State	15-24 years	Majority married	Male / Female	Urban, Rural	Cross River State	General population	Pre/post without comparison group	Weak	Quantitative	Interviewer-administered surveys	Yes	No	562	562	338 first-time mothers; 224 partners	N/A	Bivariate analysis and logistic binomial regression to confirm change over time in the primary study outcome.	N/A	First time parent interventions included peer group sessions with first-time mothers; small group sessions with the husbands/partners of peer group members; small group sessions with older women, typically the mothers or mothers-in-law of peer group members; home visits by Greater Hands Foundation community volunteers (CVs); community sensitization; and ongoing family planning service delivery at…	Designed by E2A based on formative research and other service work in the area	In-person group sessions, home visits by CVs and method provision	CVs supervised by local government health staff and program facilitators	12 month program	12 first-time mother peer group sessions meeting weekly over 4-months for 1 hour, 6 weekly sessions for male partners with female partners who wanted them to participate, 4-6 CV home visits per first time mother over 4-month study period	Social behavior change	Engaging men and boys, Social norms & networks, Interpersonal communication, Couple communication, Small-group education, Extension worker, Other	Contraceptive uptake/use	Current use of modern contraceptive	Binary	Baseline, endline	Individual	OR / AOR	Time - pre to post (first time mothers)	N/A	N/A	3.3	Not reported	<.001	Yes	Positive	N/A	N/A	N/A
Morgan et al. (2020)	Effects of a Community-Based Program on Voluntary Modern Contraceptive Uptake Among Young First-Time Parents in Cross River State, Nigeria	2020	Global Health: Science and Practice	Nigeria	Does the community-based support program increase modern contraceptive use among first-time parents aged 15–24?	Young first-time mothers and fathers (aged 15–24) with children <6 months, living in Cross River State	15-24 years	Majority married	Male / Female	Urban, Rural	Cross River State	General population	Pre/post without comparison group	Weak	Quantitative	Interviewer-administered surveys	Yes	No	562	562	339 first-time mothers; 224 partners	N/A	Bivariate analysis and logistic binomial regression to confirm change over time in the primary study outcome.	N/A	First time partent interventions included peer group sessions with first-time mothers; small group sessions with the husbands/partners of peer group members; small group sessions with older women, typically the mothers or mothers-in-law of peer group members; home visits by Greater Hands Foundation community volunteers (CVs); community sensitization; and ongoing family planning service delivery a…	Designed by E2A based on formative research and other service work in the area	In-person group sessions, home visits by CVs and method provision	CVs supervised by local government health staff and program facilitators	12 month program	13 first-time mother peer group sessions meeting weekly over 4-months for 1 hour, 6 weekly sessions for male partners with female partners who wanted them to participate, 4-6 CV home visits per first time mother over 4-month study period	Social behavior change	Engaging men and boys, Social norms & networks, Interpersonal communication, Couple communication, Small-group education, Other	Contraceptive uptake/use	Current use of modern contraceptive	Binary	Baseline, endline	Individual	OR / AOR	Time - pre to post (male partners)	N/A	N/A	3.7	Not reported	<.001	Yes	Positive	N/A	N/A	N/A
Morgan et al. (2020)	Effects of a Community-Based Program on Voluntary Modern Contraceptive Uptake Among Young First-Time Parents in Cross River State, Nigeria	2020	Global Health: Science and Practice	Nigeria	Does the community-based support program increase modern contraceptive use among first-time parents aged 15–24?	Young first-time mothers and fathers (aged 15–24) with children <6 months, living in Cross River State	15-24 years	Majority married	Male / Female	Urban, Rural	Cross River State	General population	Pre/post without comparison group	Weak	Quantitative	Interviewer-administered surveys	Yes	No	562	562	340 first-time mothers; 224 partners	N/A	Bivariate analysis and logistic binomial regression to confirm change over time in the primary study outcome.	N/A	First time partent interventions included peer group sessions with first-time mothers; small group sessions with the husbands/partners of peer group members; small group sessions with older women, typically the mothers or mothers-in-law of peer group members; home visits by Greater Hands Foundation community volunteers (CVs); community sensitization; and ongoing family planning service delivery a…	Designed by E2A based on formative research and other service work in the area	In-person group sessions, home visits by CVs and method provision	CVs supervised by local government health staff and program facilitators	12 month program	14 first-time mother peer group sessions meeting weekly over 4-months for 1 hour, 6 weekly sessions for male partners with female partners who wanted them to participate, 4-6 CV home visits per first time mother over 4-month study period	Social behavior change	Engaging men and boys, Social norms & networks, Interpersonal communication, Couple communication, Small-group education, Other	Intention/desire/demand	Birth spacing intentions	Binary	Baseline, endline	Individual	% change (pre vs. post)	Time - pre to post (first time mothers)	N/A	N/A	0.648	Not reported	<.001	Yes	Positive	N/A	N/A	N/A
Morgan et al. (2020)	Effects of a Community-Based Program on Voluntary Modern Contraceptive Uptake Among Young First-Time Parents in Cross River State, Nigeria	2020	Global Health: Science and Practice	Nigeria	Does the community-based support program increase modern contraceptive use among first-time parents aged 15–24?	Young first-time mothers and fathers (aged 15–24) with children <6 months, living in Cross River State	15-24 years	Majority married	Male / Female	Urban, Rural	Cross River State	General population	Pre/post without comparison group	Weak	Quantitative	Interviewer-administered surveys	Yes	No	562	562	341 first-time mothers; 224 partners	N/A	Bivariate analysis and logistic binomial regression to confirm change over time in the primary study outcome.	N/A	First time partent interventions included peer group sessions with first-time mothers; small group sessions with the husbands/partners of peer group members; small group sessions with older women, typically the mothers or mothers-in-law of peer group members; home visits by Greater Hands Foundation community volunteers (CVs); community sensitization; and ongoing family planning service delivery a…	Designed by E2A based on formative research and other service work in the area	In-person group sessions, home visits by CVs and method provision	CVs supervised by local government health staff and program facilitators	12 month program	15 first-time mother peer group sessions meeting weekly over 4-months for 1 hour, 6 weekly sessions for male partners with female partners who wanted them to participate, 4-6 CV home visits per first time mother over 4-month study period	Social behavior change	Engaging men and boys, Social norms & networks, Interpersonal communication, Couple communication, Small-group education, Other	Intention/desire/demand	Birth spacing intentions	Binary	Baseline, endline	Individual	% change (pre vs. post)	Time - pre to post (male partners)	N/A	N/A	0.487	Not reported	<.001	Yes	Positive	N/A	N/A	N/A
Morgan et al. (2020)	Effects of a Community-Based Program on Voluntary Modern Contraceptive Uptake Among Young First-Time Parents in Cross River State, Nigeria	2020	Global Health: Science and Practice	Nigeria	Does the community-based support program increase modern contraceptive use among first-time parents aged 15–24?	Young first-time mothers and fathers (aged 15–24) with children <6 months, living in Cross River State	15-24 years	Majority married	Male / Female	Urban, Rural	Cross River State	General population	Pre/post without comparison group	Weak	Quantitative	Interviewer-administered surveys	Yes	No	562	562	342 first-time mothers; 224 partners	N/A	Bivariate analysis and logistic binomial regression to confirm change over time in the primary study outcome.	N/A	First time partent interventions included peer group sessions with first-time mothers; small group sessions with the husbands/partners of peer group members; small group sessions with older women, typically the mothers or mothers-in-law of peer group members; home visits by Greater Hands Foundation community volunteers (CVs); community sensitization; and ongoing family planning service delivery a…	Designed by E2A based on formative research and other service work in the area	In-person group sessions, home visits by CVs and method provision	CVs supervised by local government health staff and program facilitators	12 month program	16 first-time mother peer group sessions meeting weekly over 4-months for 1 hour, 6 weekly sessions for male partners with female partners who wanted them to participate, 4-6 CV home visits per first time mother over 4-month study period	Social behavior change	Engaging men and boys, Social norms & networks, Interpersonal communication, Couple communication, Small-group education, Other	Knowledge	Awareness of at least 3 modern contraceptive methods	Binary	Baseline, endline	Individual	% change (pre vs. post)	Time - pre to post (first time mothers)	N/A	N/A	0.435	Not reported	<.001	Yes	Positive	N/A	N/A	N/A
Morgan et al. (2020)	Effects of a Community-Based Program on Voluntary Modern Contraceptive Uptake Among Young First-Time Parents in Cross River State, Nigeria	2020	Global Health: Science and Practice	Nigeria	Does the community-based support program increase modern contraceptive use among first-time parents aged 15–24?	Young first-time mothers and fathers (aged 15–24) with children <6 months, living in Cross River State	15-24 years	Majority married	Male / Female	Urban, Rural	Cross River State	General population	Pre/post without comparison group	Weak	Quantitative	Interviewer-administered surveys	Yes	No	562	562	343 first-time mothers; 224 partners	N/A	Bivariate analysis and logistic binomial regression to confirm change over time in the primary study outcome.	N/A	First time partent interventions included peer group sessions with first-time mothers; small group sessions with the husbands/partners of peer group members; small group sessions with older women, typically the mothers or mothers-in-law of peer group members; home visits by Greater Hands Foundation community volunteers (CVs); community sensitization; and ongoing family planning service delivery a…	Designed by E2A based on formative research and other service work in the area	In-person group sessions, home visits by CVs and method provision	CVs supervised by local government health staff and program facilitators	12 month program	17 first-time mother peer group sessions meeting weekly over 4-months for 1 hour, 6 weekly sessions for male partners with female partners who wanted them to participate, 4-6 CV home visits per first time mother over 4-month study period	Social behavior change	Engaging men and boys, Social norms & networks, Interpersonal communication, Couple communication, Small-group education, Other	Knowledge	Awareness of at least 3 modern contraceptive methods	Binary	Baseline, endline	Individual	% change (pre vs. post)	Time - pre to post (male partners)	N/A	N/A	0.375	Not reported	<.001	Yes	Positive	N/A	N/A	N/A
Morgan et al. (2020)	Effects of a Community-Based Program on Voluntary Modern Contraceptive Uptake Among Young First-Time Parents in Cross River State, Nigeria	2020	Global Health: Science and Practice	Nigeria	Does the community-based support program increase modern contraceptive use among first-time parents aged 15–24?	Young first-time mothers and fathers (aged 15–24) with children <6 months, living in Cross River State	15-24 years	Majority married	Male / Female	Urban, Rural	Cross River State	General population	Pre/post without comparison group	Weak	Quantitative	Interviewer-administered surveys	Yes	No	562	562	344 first-time mothers; 224 partners	N/A	Bivariate analysis and logistic binomial regression to confirm change over time in the primary study outcome.	N/A	First time partent interventions included peer group sessions with first-time mothers; small group sessions with the husbands/partners of peer group members; small group sessions with older women, typically the mothers or mothers-in-law of peer group members; home visits by Greater Hands Foundation community volunteers (CVs); community sensitization; and ongoing family planning service delivery a…	Designed by E2A based on formative research and other service work in the area	In-person group sessions, home visits by CVs and method provision	CVs supervised by local government health staff and program facilitators	12 month program	18 first-time mother peer group sessions meeting weekly over 4-months for 1 hour, 6 weekly sessions for male partners with female partners who wanted them to participate, 4-6 CV home visits per first time mother over 4-month study period	Social behavior change	Engaging men and boys, Social norms & networks, Interpersonal communication, Couple communication, Small-group education, Other	Norms/approval	Spousal approval of FP	Binary	Baseline, endline	Individual	% change (pre vs. post)	Time - pre to post (first time mothers)	N/A	N/A	0.127	Not reported	<.001	Yes	Positive	N/A	N/A	N/A
Morgan et al. (2020)	Effects of a Community-Based Program on Voluntary Modern Contraceptive Uptake Among Young First-Time Parents in Cross River State, Nigeria	2020	Global Health: Science and Practice	Nigeria	Does the community-based support program increase modern contraceptive use among first-time parents aged 15–24?	Young first-time mothers and fathers (aged 15–24) with children <6 months, living in Cross River State	15-24 years	Majority married	Male / Female	Urban, Rural	Cross River State	General population	Pre/post without comparison group	Weak	Quantitative	Interviewer-administered surveys	Yes	No	562	562	345 first-time mothers; 224 partners	N/A	Bivariate analysis and logistic binomial regression to confirm change over time in the primary study outcome.	N/A	First time partent interventions included peer group sessions with first-time mothers; small group sessions with the husbands/partners of peer group members; small group sessions with older women, typically the mothers or mothers-in-law of peer group members; home visits by Greater Hands Foundation community volunteers (CVs); community sensitization; and ongoing family planning service delivery a…	Designed by E2A based on formative research and other service work in the area	In-person group sessions, home visits by CVs and method provision	CVs supervised by local government health staff and program facilitators	12 month program	19 first-time mother peer group sessions meeting weekly over 4-months for 1 hour, 6 weekly sessions for male partners with female partners who wanted them to participate, 4-6 CV home visits per first time mother over 4-month study period	Social behavior change	Engaging men and boys, Social norms & networks, Interpersonal communication, Couple communication, Small-group education, Other	Norms/approval	Spousal approval of FP	Binary	Baseline, endline	Individual	% change (pre vs. post)	Time - pre to post (male partners)	N/A	N/A	0.059	Not reported	<.05	Yes	Positive	N/A	N/A	N/A
Morgan et al. (2020)	Effects of a Community-Based Program on Voluntary Modern Contraceptive Uptake Among Young First-Time Parents in Cross River State, Nigeria	2020	Global Health: Science and Practice	Nigeria	Does the community-based support program increase modern contraceptive use among first-time parents aged 15–24?	Young first-time mothers and fathers (aged 15–24) with children <6 months, living in Cross River State	15-24 years	Majority married	Male / Female	Urban, Rural	Cross River State	General population	Pre/post without comparison group	Weak	Quantitative	Interviewer-administered surveys	Yes	No	562	562	346 first-time mothers; 224 partners	N/A	Bivariate analysis and logistic binomial regression to confirm change over time in the primary study outcome.	N/A	First time partent interventions included peer group sessions with first-time mothers; small group sessions with the husbands/partners of peer group members; small group sessions with older women, typically the mothers or mothers-in-law of peer group members; home visits by Greater Hands Foundation community volunteers (CVs); community sensitization; and ongoing family planning service delivery a…	Designed by E2A based on formative research and other service work in the area	In-person group sessions, home visits by CVs and method provision	CVs supervised by local government health staff and program facilitators	12 month program	20 first-time mother peer group sessions meeting weekly over 4-months for 1 hour, 6 weekly sessions for male partners with female partners who wanted them to participate, 4-6 CV home visits per first time mother over 4-month study period	Social behavior change	Engaging men and boys, Social norms & networks, Interpersonal communication, Couple communication, Small-group education, Other	Communication	Discussion of FP with partner	Binary	Baseline, endline	Individual	% change (pre vs. post)	Time - pre to post (first time mothers)	N/A	N/A	0.39	Not reported	<.001	Yes	Positive	N/A	N/A	N/A
Morgan et al. (2020)	Effects of a Community-Based Program on Voluntary Modern Contraceptive Uptake Among Young First-Time Parents in Cross River State, Nigeria	2020	Global Health: Science and Practice	Nigeria	Does the community-based support program increase modern contraceptive use among first-time parents aged 15–24?	Young first-time mothers and fathers (aged 15–24) with children <6 months, living in Cross River State	15-24 years	Majority married	Male / Female	Urban, Rural	Cross River State	General population	Pre/post without comparison group	Weak	Quantitative	Interviewer-administered surveys	Yes	No	562	562	347 first-time mothers; 224 partners	N/A	Bivariate analysis and logistic binomial regression to confirm change over time in the primary study outcome.	N/A	First time partent interventions included peer group sessions with first-time mothers; small group sessions with the husbands/partners of peer group members; small group sessions with older women, typically the mothers or mothers-in-law of peer group members; home visits by Greater Hands Foundation community volunteers (CVs); community sensitization; and ongoing family planning service delivery a…	Designed by E2A based on formative research and other service work in the area	In-person group sessions, home visits by CVs and method provision	CVs supervised by local government health staff and program facilitators	12 month program	21 first-time mother peer group sessions meeting weekly over 4-months for 1 hour, 6 weekly sessions for male partners with female partners who wanted them to participate, 4-6 CV home visits per first time mother over 4-month study period	Social behavior change	Engaging men and boys, Social norms & networks, Interpersonal communication, Couple communication, Small-group education, Other	Communication	Discussion of FP with partner	Binary	Baseline, endline	Individual	% change (pre vs. post)	Time - pre to post (male partners)	N/A	N/A	0.22	Not reported	<.001	Yes	Positive	N/A	N/A	N/A
Mutea et al. (2023)	The effectiveness of combined approaches towards improving utilisation of adolescent sexual and reproductive health services in Kenya: a quasi-experimental evaluation	2023	Sexual and Reproductive Health Matters	Kenya	Does a combined health facility and community-level intervention improve the utilization of adolescent sexual and reproductive health (ASRH) services among adolescents in Kenya?	Adolescents aged 10–19 years in two Kenyan counties.	15-19 years	Marority unmarried	Female	Urban, Rural	Kobura ward in Kisumu County and Kholera ward in Kakamega County	Health facility	Repeated cross-sectional	Moderate	Quantitative	Household surveys and health facility service data	Yes	Yes	948	948	948 baseline; 952 endline; 1011 intervention (479 baseline, 532 endline) 889 control (469 baseline, 420 endline)	N/A	Descriptive statistics, difference-in-difference (DiD) analysis	Afya Halisi	Training health workers on youth-friendly services, community outreach, parental dialogue sessions, ASRH information dissemination, peer-educator desk	Designed based on formative assessment in participatory process	Training community health volunteers, community and parent dialogue sessions, training health workers, establishment of peer-educator desk	Health workers, CHVs, peer educators, county health teams	13-month implementation period	Health facilities and communities	Social behavior change, Enhancement	Youth friendly health services, peer-to-peer, interpersonal communication	Contraceptive uptake/use	Currently using method to delay/avoid pregnancy	Binary	Baseline, endline	Individual	IRR (DiD)	Interaction of assignment to intervention or control and time	N/A	N/A	1.15	0.68-1.94	0.61	Null (p>.1)	Null	N/A	N/A	N/A
Mutea et al. (2023)	The effectiveness of combined approaches towards improving utilisation of adolescent sexual and reproductive health services in Kenya: a quasi-experimental evaluation	2023	Sexual and Reproductive Health Matters	Kenya	Does a combined health facility and community-level intervention improve the utilization of adolescent sexual and reproductive health (ASRH) services among adolescents in Kenya?	Adolescents aged 10–19 years in two Kenyan counties.	15-19 years	Marority unmarried	Female	Urban, Rural	Kobura ward in Kisumu County and Kholera ward in Kakamega County	Health facility	Repeated cross-sectional	Moderate	Quantitative	Household surveys and health facility service data	Yes	Yes	948	948	949 baseline; 952 endline; 1011 intervention (479 baseline, 532 endline) 889 control (469 baseline, 420 endline)	N/A	Descriptive statistics, difference-in-difference (DiD) analysis	Afya Halisi	Training health workers on youth-friendly services, community outreach, parental dialogue sessions, ASRH information dissemination, peer-educator desk	Designed based on formative assessment in participatory process	Training community health volunteers, community and parent dialogue sessions, training health workers, establishment of peer-educator desk	Health workers, CHVs, peer educators, county health teams	13-month implementation period	Health facilities and communities	Social behavior change, Enhancement	Youth friendly health services, peer-to-peer, interpersonal communication	Service use	Comfortable seeking FP service	Binary	Baseline, endline	Individual	IRR (DiD)	Interaction of assignment to intervention or control and time	N/A	N/A	1.19	0.95–1.49	0.125	Null (p>.1)	Null	N/A	N/A	N/A
Mutea et al. (2023)	The effectiveness of combined approaches towards improving utilisation of adolescent sexual and reproductive health services in Kenya: a quasi-experimental evaluation	2023	Sexual and Reproductive Health Matters	Kenya	Does a combined health facility and community-level intervention improve the utilization of adolescent sexual and reproductive health (ASRH) services among adolescents in Kenya?	Adolescents aged 10–19 years in two Kenyan counties.	15-19 years	Marority unmarried	Female	Urban, Rural	Kobura ward in Kisumu County and Kholera ward in Kakamega County	Health facility	Repeated cross-sectional	Moderate	Quantitative	Household surveys and health facility service data	Yes	Yes	948	948	950 baseline; 952 endline; 1011 intervention (479 baseline, 532 endline) 889 control (469 baseline, 420 endline)	N/A	Descriptive statistics, difference-in-difference (DiD) analysis	Afya Halisi	Training health workers on youth-friendly services, community outreach, parental dialogue sessions, ASRH information dissemination, peer-educator desk	Designed based on formative assessment in participatory process	Training community health volunteers, community and parent dialogue sessions, training health workers, establishment of peer-educator desk	Health workers, CHVs, peer educators, county health teams	13-month implementation period	Health facilities and communities	Social behavior change, Enhancement	Youth friendly health services, peer-to-peer, interpersonal communication	Service use	Fear of parents made adolescent uncomfortable in seeking ASRH services	Binary	Baseline, endline	Individual	IRR (DiD)	Interaction of assignment to intervention or control and time	N/A	N/A	0.58	0.42–0.79	0.001	Significant (p<.05)	Negative	N/A	N/A	N/A
Mutea et al. (2023)	The effectiveness of combined approaches towards improving utilisation of adolescent sexual and reproductive health services in Kenya: a quasi-experimental evaluation	2023	Sexual and Reproductive Health Matters	Kenya	Does a combined health facility and community-level intervention improve the utilization of adolescent sexual and reproductive health (ASRH) services among adolescents in Kenya?	Adolescents aged 10–19 years in two Kenyan counties.	15-19 years	Marority unmarried	Female	Urban, Rural	Kobura ward in Kisumu County and Kholera ward in Kakamega County	Health facility	Repeated cross-sectional	Moderate	Quantitative	Household surveys and health facility service data	Yes	Yes	948	948	951 baseline; 952 endline; 1011 intervention (479 baseline, 532 endline) 889 control (469 baseline, 420 endline)	N/A	Descriptive statistics, difference-in-difference (DiD) analysis	Afya Halisi	Training health workers on youth-friendly services, community outreach, parental dialogue sessions, ASRH information dissemination, peer-educator desk	Designed based on formative assessment in participatory process	Training community health volunteers, community and parent dialogue sessions, training health workers, establishment of peer-educator desk	Health workers, CHVs, peer educators, county health teams	13-month implementation period	Health facilities and communities	Social behavior change, Enhancement	Youth friendly health services, peer-to-peer, interpersonal communication	Service use	Lack of support from partners made adolescent uncomfortable in seeking ASRH service	Binary	Baseline, endline	Individual	IRR (DiD)	Interaction of assignment to intervention or control and time	N/A	N/A	0.25	0.08–0.82	0.023	Significant (p<.05)	Negative	N/A	N/A	N/A
Mutea et al. (2023)	The effectiveness of combined approaches towards improving utilisation of adolescent sexual and reproductive health services in Kenya: a quasi-experimental evaluation	2023	Sexual and Reproductive Health Matters	Kenya	Does a combined health facility and community-level intervention improve the utilization of adolescent sexual and reproductive health (ASRH) services among adolescents in Kenya?	Adolescents aged 10–19 years in two Kenyan counties.	15-19 years	Marority unmarried	Female	Urban, Rural	Kobura ward in Kisumu County and Kholera ward in Kakamega County	Health facility	Repeated cross-sectional	Moderate	Quantitative	Household surveys and health facility service data	Yes	Yes	948	948	952 baseline; 952 endline; 1011 intervention (479 baseline, 532 endline) 889 control (469 baseline, 420 endline)	N/A	Descriptive statistics, difference-in-difference (DiD) analysis	Afya Halisi	Training health workers on youth-friendly services, community outreach, parental dialogue sessions, ASRH information dissemination, peer-educator desk	Designed based on formative assessment in participatory process	Training community health volunteers, community and parent dialogue sessions, training health workers, establishment of peer-educator desk	Health workers, CHVs, peer educators, county health teams	13-month implementation period	Health facilities and communities	Social behavior change, Enhancement	Youth friendly health services, peer-to-peer, interpersonal communication	Service use	Provider bias made adolescents uncomfortable in seeking ASRH services	Binary	Baseline, endline	Individual	IRR (DiD)	Interaction of assignment to intervention or control and time	N/A	N/A	1.48	0.79–2.78	0.219	Null (p>.1)	Null	N/A	N/A	N/A
Mutea et al. (2023)	The effectiveness of combined approaches towards improving utilisation of adolescent sexual and reproductive health services in Kenya: a quasi-experimental evaluation	2023	Sexual and Reproductive Health Matters	Kenya	Does a combined health facility and community-level intervention improve the utilization of adolescent sexual and reproductive health (ASRH) services among adolescents in Kenya?	Adolescents aged 10–19 years in two Kenyan counties.	15-19 years	Marority unmarried	Female	Urban, Rural	Kobura ward in Kisumu County and Kholera ward in Kakamega County	Health facility	Repeated cross-sectional	Moderate	Quantitative	Household surveys and health facility service data	Yes	Yes	948	948	953 baseline; 952 endline; 1011 intervention (479 baseline, 532 endline) 889 control (469 baseline, 420 endline)	N/A	Descriptive statistics, difference-in-difference (DiD) analysis	Afya Halisi	Training health workers on youth-friendly services, community outreach, parental dialogue sessions, ASRH information dissemination, peer-educator desk	Designed based on formative assessment in participatory process	Training community health volunteers, community and parent dialogue sessions, training health workers, establishment of peer-educator desk	Health workers, CHVs, peer educators, county health teams	13-month implementation period	Health facilities and communities	Social behavior change, Enhancement	Youth friendly health services, peer-to-peer, interpersonal communication	Service use	Stigma from peers made adolescents uncomfortable in seeking ASRH services	Binary	Baseline, endline	Individual	IRR (DiD)	Interaction of assignment to intervention or control and time	N/A	N/A	1.02	0.97–1.07	0.381	Null (p>.1)	Null	N/A	N/A	N/A
Mutea et al. (2023)	The effectiveness of combined approaches towards improving utilisation of adolescent sexual and reproductive health services in Kenya: a quasi-experimental evaluation	2023	Sexual and Reproductive Health Matters	Kenya	Does a combined health facility and community-level intervention improve the utilization of adolescent sexual and reproductive health (ASRH) services among adolescents in Kenya?	Adolescents aged 10–19 years in two Kenyan counties.	15-19 years	Marority unmarried	Female	Urban, Rural	Kobura ward in Kisumu County and Kholera ward in Kakamega County	Health facility	Repeated cross-sectional	Moderate	Quantitative	Household surveys and health facility service data	Yes	Yes	948	948	954 baseline; 952 endline; 1011 intervention (479 baseline, 532 endline) 889 control (469 baseline, 420 endline)	N/A	Descriptive statistics, difference-in-difference (DiD) analysis	Afya Halisi	Training health workers on youth-friendly services, community outreach, parental dialogue sessions, ASRH information dissemination, peer-educator desk	Designed based on formative assessment in participatory process	Training community health volunteers, community and parent dialogue sessions, training health workers, establishment of peer-educator desk	Health workers, CHVs, peer educators, county health teams	13-month implementation period	Health facilities and communities	Social behavior change, Enhancement	Youth friendly health services, peer-to-peer, interpersonal communication	Knowledge	Knowledge of sex, misconception on pregnancy and contraception	Binary	Baseline, endline	Individual	IRR (DiD)	Interaction of assignment to intervention or control and time	N/A	N/A	1.2	0.93–1.56	0.161	Null (p>.1)	Null	N/A	N/A	N/A
Mutea et al. (2023)	The effectiveness of combined approaches towards improving utilisation of adolescent sexual and reproductive health services in Kenya: a quasi-experimental evaluation	2023	Sexual and Reproductive Health Matters	Kenya	Does a combined health facility and community-level intervention improve the utilization of adolescent sexual and reproductive health (ASRH) services among adolescents in Kenya?	Adolescents aged 10–19 years in two Kenyan counties.	15-19 years	Marority unmarried	Female	Urban, Rural	Kobura ward in Kisumu County and Kholera ward in Kakamega County	Health facility	Repeated cross-sectional	Moderate	Quantitative	Household surveys and health facility service data	Yes	Yes	948	948	955 baseline; 952 endline; 1011 intervention (479 baseline, 532 endline) 889 control (469 baseline, 420 endline)	N/A	Descriptive statistics, difference-in-difference (DiD) analysis	Afya Halisi	Training health workers on youth-friendly services, community outreach, parental dialogue sessions, ASRH information dissemination, peer-educator desk	Designed based on formative assessment in participatory process	Training community health volunteers, community and parent dialogue sessions, training health workers, establishment of peer-educator desk	Health workers, CHVs, peer educators, county health teams	13-month implementation period	Health facilities and communities	Social behavior change, Enhancement	Youth friendly health services, peer-to-peer, interpersonal communication	Knowledge	Knowledge of FP/contraception	Binary	Baseline, endline	Individual	IRR (DiD)	Interaction of assignment to intervention or control and time	N/A	N/A	1.16	0.96–1.41	0.116	Null (p>.1)	Null	N/A	N/A	N/A
Mutea et al. (2023)	The effectiveness of combined approaches towards improving utilisation of adolescent sexual and reproductive health services in Kenya: a quasi-experimental evaluation	2023	Sexual and Reproductive Health Matters	Kenya	Does a combined health facility and community-level intervention improve the utilization of adolescent sexual and reproductive health (ASRH) services among adolescents in Kenya?	Adolescents aged 10–19 years in two Kenyan counties.	15-19 years	Marority unmarried	Female	Urban, Rural	Kobura ward in Kisumu County and Kholera ward in Kakamega County	Health facility	Repeated cross-sectional	Moderate	Quantitative	Household surveys and health facility service data	Yes	Yes	948	948	956 baseline; 952 endline; 1011 intervention (479 baseline, 532 endline) 889 control (469 baseline, 420 endline)	N/A	Descriptive statistics, difference-in-difference (DiD) analysis	Afya Halisi	Training health workers on youth-friendly services, community outreach, parental dialogue sessions, ASRH information dissemination, peer-educator desk	Designed based on formative assessment in participatory process	Training community health volunteers, community and parent dialogue sessions, training health workers, establishment of peer-educator desk	Health workers, CHVs, peer educators, county health teams	13-month implementation period	Health facilities and communities	Social behavior change, Enhancement	Youth friendly health services, peer-to-peer, interpersonal communication	Knowledge	Knowledge of ANC	Binary	Baseline, endline	Individual	IRR (DiD)	Interaction of assignment to intervention or control and time	N/A	N/A	1.02	0.97–1.08	0.451	Null (p>.1)	Null	N/A	N/A	N/A
Mutea et al. (2023)	The effectiveness of combined approaches towards improving utilisation of adolescent sexual and reproductive health services in Kenya: a quasi-experimental evaluation	2023	Sexual and Reproductive Health Matters	Kenya	Does a combined health facility and community-level intervention improve the utilization of adolescent sexual and reproductive health (ASRH) services among adolescents in Kenya?	Adolescents aged 10–19 years in two Kenyan counties.	15-19 years	Marority unmarried	Female	Urban, Rural	Kobura ward in Kisumu County and Kholera ward in Kakamega County	Health facility	Repeated cross-sectional	Moderate	Quantitative	Household surveys and health facility service data	Yes	Yes	948	948	957 baseline; 952 endline; 1011 intervention (479 baseline, 532 endline) 889 control (469 baseline, 420 endline)	N/A	Descriptive statistics, difference-in-difference (DiD) analysis	Afya Halisi	Training health workers on youth-friendly services, community outreach, parental dialogue sessions, ASRH information dissemination, peer-educator desk	Designed based on formative assessment in participatory process	Training community health volunteers, community and parent dialogue sessions, training health workers, establishment of peer-educator desk	Health workers, CHVs, peer educators, county health teams	13-month implementation period	Health facilities and communities	Social behavior change, Enhancement	Youth friendly health services, peer-to-peer, interpersonal communication	Knowledge	Knowledge of HIV counselling, testing and treatment	Binary	Baseline, endline	Individual	IRR (DiD)	Interaction of assignment to intervention or control and time	N/A	N/A	1.01	0.83–1.23	0.89	Null (p>.1)	Null	N/A	N/A	N/A
Mutea et al. (2023)	The effectiveness of combined approaches towards improving utilisation of adolescent sexual and reproductive health services in Kenya: a quasi-experimental evaluation	2023	Sexual and Reproductive Health Matters	Kenya	Does a combined health facility and community-level intervention improve the utilization of adolescent sexual and reproductive health (ASRH) services among adolescents in Kenya?	Adolescents aged 10–19 years in two Kenyan counties.	15-19 years	Marority unmarried	Female	Urban, Rural	Kobura ward in Kisumu County and Kholera ward in Kakamega County	Health facility	Repeated cross-sectional	Moderate	Quantitative	Household surveys and health facility service data	Yes	Yes	948	948	958 baseline; 952 endline; 1011 intervention (479 baseline, 532 endline) 889 control (469 baseline, 420 endline)	N/A	Descriptive statistics, difference-in-difference (DiD) analysis	Afya Halisi	Training health workers on youth-friendly services, community outreach, parental dialogue sessions, ASRH information dissemination, peer-educator desk	Designed based on formative assessment in participatory process	Training community health volunteers, community and parent dialogue sessions, training health workers, establishment of peer-educator desk	Health workers, CHVs, peer educators, county health teams	13-month implementation period	Health facilities and communities	Social behavior change, Enhancement	Youth friendly health services, peer-to-peer, interpersonal communication	Knowledge	Knowledge of STI counselling	Binary	Baseline, endline	Individual	IRR (DiD)	Interaction of assignment to intervention or control and time	N/A	N/A	1.07	0.97–1.17	0.175	Null (p>.1)	Null	N/A	N/A	N/A
Mutea et al. (2023)	The effectiveness of combined approaches towards improving utilisation of adolescent sexual and reproductive health services in Kenya: a quasi-experimental evaluation	2023	Sexual and Reproductive Health Matters	Kenya	Does a combined health facility and community-level intervention improve the utilization of adolescent sexual and reproductive health (ASRH) services among adolescents in Kenya?	Adolescents aged 10–19 years in two Kenyan counties.	15-19 years	Marority unmarried	Female	Urban, Rural	Kobura ward in Kisumu County and Kholera ward in Kakamega County	Health facility	Repeated cross-sectional	Moderate	Quantitative	Household surveys and health facility service data	Yes	Yes	948	948	959 baseline; 952 endline; 1011 intervention (479 baseline, 532 endline) 889 control (469 baseline, 420 endline)	N/A	Descriptive statistics, difference-in-difference (DiD) analysis	Afya Halisi	Training health workers on youth-friendly services, community outreach, parental dialogue sessions, ASRH information dissemination, peer-educator desk	Designed based on formative assessment in participatory process	Training community health volunteers, community and parent dialogue sessions, training health workers, establishment of peer-educator desk	Health workers, CHVs, peer educators, county health teams	13-month implementation period	Health facilities and communities	Social behavior change, Enhancement	Youth friendly health services, peer-to-peer, interpersonal communication	Knowledge	Knowledge of post-abortal care	Binary	Baseline, endline	Individual	IRR (DiD)	Interaction of assignment to intervention or control and time	N/A	N/A	1.01	0.96–1.06	0.786	Null (p>.1)	Null	N/A	N/A	N/A
Mutea et al. (2023)	The effectiveness of combined approaches towards improving utilisation of adolescent sexual and reproductive health services in Kenya: a quasi-experimental evaluation	2023	Sexual and Reproductive Health Matters	Kenya	Does a combined health facility and community-level intervention improve the utilization of adolescent sexual and reproductive health (ASRH) services among adolescents in Kenya?	Adolescents aged 10–19 years in two Kenyan counties.	15-19 years	Marority unmarried	Female	Urban, Rural	Kobura ward in Kisumu County and Kholera ward in Kakamega County	Health facility	Repeated cross-sectional	Moderate	Quantitative	Household surveys and health facility service data	Yes	Yes	948	948	960 baseline; 952 endline; 1011 intervention (479 baseline, 532 endline) 889 control (469 baseline, 420 endline)	N/A	Descriptive statistics, difference-in-difference (DiD) analysis	Afya Halisi	Training health workers on youth-friendly services, community outreach, parental dialogue sessions, ASRH information dissemination, peer-educator desk	Designed based on formative assessment in participatory process	Training community health volunteers, community and parent dialogue sessions, training health workers, establishment of peer-educator desk	Health workers, CHVs, peer educators, county health teams	13-month implementation period	Health facilities and communities	Social behavior change, Enhancement	Youth friendly health services, peer-to-peer, interpersonal communication	Knowledge	Heard of youth friendly room or service	Binary	Baseline, endline	Individual	IRR (DiD)	Interaction of assignment to intervention or control and time	N/A	N/A	1.25	0.92–1.71	0.156	Null (p>.1)	Null	N/A	N/A	N/A
Nuwamanya et al. (2020)	Effectiveness of a mobile phone application to increase access to sexual and reproductive health information, goods, and services among university students in Uganda: a randomized controlled trial	2020	Contraception and Reproductive Medicine	Uganda	Does access to a mobile phone application improve access to SRH information and services among university students?	University students aged 18-30 at Mbarara University of Science and Technology	18-30 years	Mixed	Male / Female	Urban	Western Uganda	School	Randomized controlled trial (RCT).	Strong	Quantitative	Interviewer-administered surveys	Yes	Yes	1112	1112	559 intervention; 556 control	0.24	Difference-in-differences analysis, quantile regression for knowledge score, logit link function for other outcomes.	N/A	A mobile application designed to provide SRH information, goods (e.g., condoms), and services (e.g., linkage to clinics)	Developed with youth input; tailored content for university students	Mobile phone	Research team with youth engagement	6-month follow-up	University campus, mobile phone	Supply & service delivery, Social behavior change	Digitial technology	Contraceptive uptake/use	Contraceptive use	Binary	Baseline, endline	Individual	ORR (DiD)	Interaction of assignment to intervention or control and time	N/A	N/A	1.58	1.02-2.46	<.05	Significant (p<.05)	Positive	N/A	N/A	N/A
Nuwamanya et al. (2020)	Effectiveness of a mobile phone application to increase access to sexual and reproductive health information, goods, and services among university students in Uganda: a randomized controlled trial	2020	Contraception and Reproductive Medicine	Uganda	Does access to a mobile phone application improve access to SRH information and services among university students?	University students aged 18-30 at Mbarara University of Science and Technology	18-30 years	Mixed	Male / Female	Urban	Western Uganda	School	Randomized controlled trial (RCT).	Strong	Quantitative	Interviewer-administered surveys	Yes	Yes	1112	1112	560 intervention; 556 control	1.24	Difference-in-differences analysis, quantile regression for knowledge score, logit link function for other outcomes.	N/A	A mobile application designed to provide SRH information, goods (e.g., condoms), and services (e.g., linkage to clinics)	Developed with youth input; tailored content for university students	Mobile phone	Research team with youth engagement	6-month follow-up	University campus, mobile phone	Supply & service delivery, Social behavior change	Digitial technology	Knowledge	SRH knowledge score	Continuous	Baseline, endline	Individual	Beta (DiD)	Interaction of assignment to intervention or control and time	N/A	N/A	0.98	0.29-1.46	<.05	Significant (p<.05)	Positive	N/A	N/A	N/A
Nuwamanya et al. (2020)	Effectiveness of a mobile phone application to increase access to sexual and reproductive health information, goods, and services among university students in Uganda: a randomized controlled trial	2020	Contraception and Reproductive Medicine	Uganda	Does access to a mobile phone application improve access to SRH information and services among university students?	University students aged 18-30 at Mbarara University of Science and Technology	18-30 years	Mixed	Male / Female	Urban	Western Uganda	School	Randomized controlled trial (RCT).	Strong	Quantitative	Interviewer-administered surveys	Yes	Yes	1112	1112	561 intervention; 556 control	2.24	Difference-in-differences analysis, quantile regression for knowledge score, logit link function for other outcomes.	N/A	A mobile application designed to provide SRH information, goods (e.g., condoms), and services (e.g., linkage to clinics)	Developed with youth input; tailored content for university students	Mobile phone	Research team with youth engagement	6-month follow-up	University campus, mobile phone	Supply & service delivery, Social behavior change	Digitial technology	Service use	Use of HIV VTC services	Binary	Baseline, endline	Individual	ORR (DiD)	Interaction of assignment to intervention or control and time	N/A	N/A	3.57	2.24–5.68	<.05	Significant (p<.05)	Positive	N/A	N/A	N/A
Nuwamanya et al. (2020)	Effectiveness of a mobile phone application to increase access to sexual and reproductive health information, goods, and services among university students in Uganda: a randomized controlled trial	2020	Contraception and Reproductive Medicine	Uganda	Does access to a mobile phone application improve access to SRH information and services among university students?	University students aged 18-30 at Mbarara University of Science and Technology	18-30 years	Mixed	Male / Female	Urban	Western Uganda	School	Randomized controlled trial (RCT).	Strong	Quantitative	Interviewer-administered surveys	Yes	Yes	1112	1112	562 intervention; 556 control	3.24	Difference-in-differences analysis, quantile regression for knowledge score, logit link function for other outcomes.	N/A	A mobile application designed to provide SRH information, goods (e.g., condoms), and services (e.g., linkage to clinics)	Developed with youth input; tailored content for university students	Mobile phone	Research team with youth engagement	6-month follow-up	University campus, mobile phone	Supply & service delivery, Social behavior change	Digitial technology	Service use	Use of STI D&T services	Binary	Baseline, endline	Individual	ORR (DiD)	Interaction of assignment to intervention or control and time	N/A	N/A	1.99	1.26-2.86	<.05	Significant (p<.05)	Positive	N/A	N/A	N/A
Renzaho et al. (2022)	Do Community-based Livelihood Interventions Affect Sexual and Reproductive Health and Rights of Young People in Slum Areas of Uganda: a Difference-in-Difference with Kernel Propensity Score Matching Analysis	2022	Journal of Urban Health	Uganda	Does a community-based livelihood intervention improve sexual and reproductive health and rights (SRHR) outcomes among youth in Ugandan slums?	Young people (15–24 years old) living in slum areas of Uganda	15-24 years	Marority unmarried	Male / Female	Urban	Kampala and Wakiso	Informal settlement/slum	Repeated cross-sectional	Moderate	Quantitative	Interviewer-administered household survey	Yes	Yes	663	663	baseline 663 (512 intervention; 151 control); endline 579 (456 intervention; 123 control)	N/A	Difference-in-Difference (DiD), Kernel Propensity Score Matching	UPLIFT	Multi-component program including life skills training, savings groups, financial literacy, SRHR information, and referrals to services	Tailored to youth in urban informal settlements; combines economic empowerment with SRHR education	Group-based training and community engagement sessions	Local implementing partners and community-based organizations	18-24 months	Community centers and youth spaces within slum areas	Enabling environment, Social behavior change	Peer-led approaches, Empowerment components, Engaging men and boys, Small-group education, Interpersonal communication	Service use	Visited a health facility to get information on FP and STDs past year	Binary	Baseline, endline	Individual	% diff (DiD)	Assigned to intervention or control	N/A	N/A	0.135	7.9	0.07	Marginally significant (p<.1)	Positive	N/A	N/A	N/A
Renzaho et al. (2022)	Do Community-based Livelihood Interventions Affect Sexual and Reproductive Health and Rights of Young People in Slum Areas of Uganda: a Difference-in-Difference with Kernel Propensity Score Matching Analysis	2022	Journal of Urban Health	Uganda	Does a community-based livelihood intervention improve sexual and reproductive health and rights (SRHR) outcomes among youth in Ugandan slums?	Young people (15–24 years old) living in slum areas of Uganda	15-24 years	Marority unmarried	Male / Female	Urban	Kampala and Wakiso	Informal settlement/slum	Repeated cross-sectional	Moderate	Quantitative	Interviewer-administered household survey	Yes	Yes	663	663	baseline 663 (512 intervention; 151 control); endline 579 (456 intervention; 123 control)	N/A	Difference-in-Difference (DiD), Kernel Propensity Score Matching	UPLIFT	Multi-component program including life skills training, savings groups, financial literacy, SRHR information, and referrals to services	Tailored to youth in urban informal settlements; combines economic empowerment with SRHR education	Group-based training and community engagement sessions	Local implementing partners and community-based organizations	18-24 months	Community centers and youth spaces within slum areas	Enabling environment, Social behavior change	Peer-led approaches, Empowerment components, Engaging men and boys, Small-group education, Interpersonal communication	Knowledge	Aware of place to get family planning	Binary	Baseline, endline	Individual	% diff (DiD)	Assigned to intervention or control	N/A	N/A	0.151	4.7	0.001	Significant (p<.05)	Positive	N/A	N/A	N/A
Renzaho et al. (2022)	Do Community-based Livelihood Interventions Affect Sexual and Reproductive Health and Rights of Young People in Slum Areas of Uganda: a Difference-in-Difference with Kernel Propensity Score Matching Analysis	2022	Journal of Urban Health	Uganda	Does a community-based livelihood intervention improve sexual and reproductive health and rights (SRHR) outcomes among youth in Ugandan slums?	Young people (15–24 years old) living in slum areas of Uganda	15-24 years	Marority unmarried	Male / Female	Urban	Kampala and Wakiso	Informal settlement/slum	Repeated cross-sectional	Moderate	Quantitative	Interviewer-administered household survey	Yes	Yes	663	663	baseline 663 (512 intervention; 151 control); endline 579 (456 intervention; 123 control)	N/A	Difference-in-Difference (DiD), Kernel Propensity Score Matching	UPLIFT	Multi-component program including life skills training, savings groups, financial literacy, SRHR information, and referrals to services	Tailored to youth in urban informal settlements; combines economic empowerment with SRHR education	Group-based training and community engagement sessions	Local implementing partners and community-based organizations	18-24 months	Community centers and youth spaces within slum areas	Enabling environment, Social behavior change	Peer-led approaches, Empowerment components, Engaging men and boys, Small-group education, Interpersonal communication	Knowledge	Have someone or somewhere to go for help with abortion questions	Binary	Baseline, endline	Individual	% diff (DiD)	Assigned to intervention or control	N/A	N/A	0.154	7.8	0.05	Significant (p<.05)	Positive	N/A	N/A	N/A
Renzaho et al. (2022)	Do Community-based Livelihood Interventions Affect Sexual and Reproductive Health and Rights of Young People in Slum Areas of Uganda: a Difference-in-Difference with Kernel Propensity Score Matching Analysis	2022	Journal of Urban Health	Uganda	Does a community-based livelihood intervention improve sexual and reproductive health and rights (SRHR) outcomes among youth in Ugandan slums?	Young people (15–24 years old) living in slum areas of Uganda	15-24 years	Marority unmarried	Male / Female	Urban	Kampala and Wakiso	Informal settlement/slum	Repeated cross-sectional	Moderate	Quantitative	Interviewer-administered household survey	Yes	Yes	663	663	baseline 663 (512 intervention; 151 control); endline 579 (456 intervention; 123 control)	N/A	Difference-in-Difference (DiD), Kernel Propensity Score Matching	UPLIFT	Multi-component program including life skills training, savings groups, financial literacy, SRHR information, and referrals to services	Tailored to youth in urban informal settlements; combines economic empowerment with SRHR education	Group-based training and community engagement sessions	Local implementing partners and community-based organizations	18-24 months	Community centers and youth spaces within slum areas	Enabling environment, Social behavior change	Peer-led approaches, Empowerment components, Engaging men and boys, Small-group education, Interpersonal communication	Agency/Empowerment	Can make decisions about when and whether to have children without fear	Binary	Baseline, endline	Individual	% diff (DiD)	Assigned to intervention or control	N/A	N/A	0.053	4.7	0.26	Null (p>.1)	Null	N/A	N/A	N/A
Renzaho et al. (2022)	Do Community-based Livelihood Interventions Affect Sexual and Reproductive Health and Rights of Young People in Slum Areas of Uganda: a Difference-in-Difference with Kernel Propensity Score Matching Analysis	2022	Journal of Urban Health	Uganda	Does a community-based livelihood intervention improve sexual and reproductive health and rights (SRHR) outcomes among youth in Ugandan slums?	Young people (15–24 years old) living in slum areas of Uganda	15-24 years	Marority unmarried	Male / Female	Urban	Kampala and Wakiso	Informal settlement/slum	Repeated cross-sectional	Moderate	Quantitative	Interviewer-administered household survey	Yes	Yes	663	663	baseline 663 (512 intervention; 151 control); endline 579 (456 intervention; 123 control)	N/A	Difference-in-Difference (DiD), Kernel Propensity Score Matching	UPLIFT	Multi-component program including life skills training, savings groups, financial literacy, SRHR information, and referrals to services	Tailored to youth in urban informal settlements; combines economic empowerment with SRHR education	Group-based training and community engagement sessions	Local implementing partners and community-based organizations	18-24 months	Community centers and youth spaces within slum areas	Enabling environment, Social behavior change	Peer-led approaches, Empowerment components, Engaging men and boys, Small-group education, Interpersonal communication	Other	Availability of modern, female controlled birth control	Binary	Baseline, endline	Individual	% diff (DiD)	Assigned to intervention or control	N/A	N/A	0.008	5.6	0.89	Null (p>.1)	Null	N/A	N/A	N/A
Renzaho et al. (2022)	Do Community-based Livelihood Interventions Affect Sexual and Reproductive Health and Rights of Young People in Slum Areas of Uganda: a Difference-in-Difference with Kernel Propensity Score Matching Analysis	2022	Journal of Urban Health	Uganda	Does a community-based livelihood intervention improve sexual and reproductive health and rights (SRHR) outcomes among youth in Ugandan slums?	Young people (15–24 years old) living in slum areas of Uganda	15-24 years	Marority unmarried	Male / Female	Urban	Kampala and Wakiso	Informal settlement/slum	Repeated cross-sectional	Moderate	Quantitative	Interviewer-administered household survey	Yes	Yes	663	663	baseline 663 (512 intervention; 151 control); endline 579 (456 intervention; 123 control)	N/A	Difference-in-Difference (DiD), Kernel Propensity Score Matching	UPLIFT	Multi-component program including life skills training, savings groups, financial literacy, SRHR information, and referrals to services	Tailored to youth in urban informal settlements; combines economic empowerment with SRHR education	Group-based training and community engagement sessions	Local implementing partners and community-based organizations	18-24 months	Community centers and youth spaces within slum areas	Enabling environment, Social behavior change	Peer-led approaches, Empowerment components, Engaging men and boys, Small-group education, Interpersonal communication	Other	Affordability of modern, female controlled birth control	Binary	Baseline, endline	Individual	% diff (DiD)	Assigned to intervention or control	N/A	N/A	-0.172	6.3	0.006	Significant (p<.05)	Negative	N/A	N/A	N/A
Rosenberg et al. (2018)	Comparing Youth Friendly Health Services to the Standard of Care through “Girl Power-Malawi”: A Quasi-Experimental Cohort Study	2018	Journal of Acquired Immune Deficiency Syndromes	Malawi	Does implementation of a youth-friendly health services (YFHS) model improve uptake of sexual and reproductive health services—such as HIV testing, condom use, and hormonal contraception—among adolescent girls and young women in Malawi compared to standard of care?	Adolescent girls and young women aged 15-24 years in Lilongwe, Malawi who were not pregnant but were sexually active or anticipated becoming sexually active	15-24 years	Marority unmarried	Female	Urban	Lilongwe	Health facility	Cluster randomized controlled trial (RCT)	Strong	Quantitative	Interviewer-administered surveys and service statistics (clinic cards)	Yes	Yes	1000	1000	Interventions 750 (three arms 250 each); control 250	0.13	Generalized linear models with an identity link and binomial distribution for comparing service uptake proportions. Generalized linear models with a log link and negative binomial distribution for comparing the mean number of services received.	Girl Power Malawi	Youth-friendly health services (YFHS) in three arms (1) YFS only (youth-focused space, more range of times, training on YFS and peer-educators to support), (2) YFS + behavioral intervention (12 monthly facility-led curriculum-driven small-group interactive sessions, (3) YFS + behavioral intervention + conditional cash transfer (monthly cash transfer for attending each behavioral intervention sess…	Not reported	youth friendly clinic services, small group sessions, conditional cash transfer	Trained clinicians, trained peer-educators, trained facilitators	12 months	Clinics and community	Enhancement, Social behavior change	Adolescent-responsive services, Financial incentives, Small-group education	Contraceptive uptake/use	Receipt of hormonal contraceptive method (service card)	Binary	Service statistics	Individual	RD / APD	Assigned to intervention (any of three arms) or control	N/A	N/A	0.39	34%-45%	Not reported	Significant (p<.05)	Positive	N/A	N/A	N/A
Rosenberg et al. (2018)	Comparing Youth Friendly Health Services to the Standard of Care through “Girl Power-Malawi”: A Quasi-Experimental Cohort Study	2018	Journal of Acquired Immune Deficiency Syndromes	Malawi	Does implementation of a youth-friendly health services (YFHS) model improve uptake of sexual and reproductive health services—such as HIV testing, condom use, and hormonal contraception—among adolescent girls and young women in Malawi compared to standard of care?	Adolescent girls and young women aged 15-24 years in Lilongwe, Malawi who were not pregnant but were sexually active or anticipated becoming sexually active	15-24 years	Marority unmarried	Female	Urban	Lilongwe	Health facility	Cluster randomized controlled trial (RCT)	Strong	Quantitative	Interviewer-administered surveys and service statistics (clinic cards)	Yes	Yes	1000	1000	Interventions 750 (three arms 250 each); control 251	0.13	Generalized linear models with an identity link and binomial distribution for comparing service uptake proportions. Generalized linear models with a log link and negative binomial distribution for comparing the mean number of services received.	Girl Power Malawi	Youth-friendly health services (YFHS) in three arms (1) YFS only (youth-focused space, more range of times, training on YFS and peer-educators to support), (2) YFS + behavioral intervention (12 monthly facility-led curriculum-driven small-group interactive sessions, (3) YFS + behavioral intervention + conditional cash transfer (monthly cash transfer for attending each behavioral intervention sess…	Not reported	youth friendly clinic services, small group sessions, conditional cash transfer	Trained clinicians, trained peer-educators, trained facilitators	12 months	Clinics and community	Enhancement, Social behavior change	Adolescent-responsive services, Financial incentives, Small-group education	Contraceptive uptake/use	Mean # of times hormonal contraception was received (service card)	Count	Service statistics	Individual	IRR / AIRR	Assigned to intervention (any of three arms) or control	N/A	N/A	6	4.2-8.7	Not reported	Significant (p<.05)	Positive	N/A	N/A	N/A
Rosenberg et al. (2018)	Comparing Youth Friendly Health Services to the Standard of Care through “Girl Power-Malawi”: A Quasi-Experimental Cohort Study	2018	Journal of Acquired Immune Deficiency Syndromes	Malawi	Does implementation of a youth-friendly health services (YFHS) model improve uptake of sexual and reproductive health services—such as HIV testing, condom use, and hormonal contraception—among adolescent girls and young women in Malawi compared to standard of care?	Adolescent girls and young women aged 15-24 years in Lilongwe, Malawi who were not pregnant but were sexually active or anticipated becoming sexually active	15-24 years	Marority unmarried	Female	Urban	Lilongwe	Health facility	Cluster randomized controlled trial (RCT)	Strong	Quantitative	Interviewer-administered surveys and service statistics (clinic cards)	Yes	Yes	1000	1000	Interventions 750 (three arms 250 each); control 252	0.13	Generalized linear models with an identity link and binomial distribution for comparing service uptake proportions. Generalized linear models with a log link and negative binomial distribution for comparing the mean number of services received.	Girl Power Malawi	Youth-friendly health services (YFHS) in three arms (1) YFS only (youth-focused space, more range of times, training on YFS and peer-educators to support), (2) YFS + behavioral intervention (12 monthly facility-led curriculum-driven small-group interactive sessions, (3) YFS + behavioral intervention + conditional cash transfer (monthly cash transfer for attending each behavioral intervention sess…	Not reported	youth friendly clinic services, small group sessions, conditional cash transfer	Trained clinicians, trained peer-educators, trained facilitators	12 months	Clinics and community	Enhancement, Social behavior change	Adolescent-responsive services, Financial incentives, Small-group education	Contraceptive uptake/use	Self-report current contraceptive use	Binary	12-month endline	Individual	% diff (int vs. control)	Assigned to intervention (any of three arms) or control	N/A	N/A	0.2	Not reported	<.0001	Significant (p<.05)	Positive	N/A	N/A	N/A
Rosenberg et al. (2018)	Comparing Youth Friendly Health Services to the Standard of Care through “Girl Power-Malawi”: A Quasi-Experimental Cohort Study	2018	Journal of Acquired Immune Deficiency Syndromes	Malawi	Does implementation of a youth-friendly health services (YFHS) model improve uptake of sexual and reproductive health services—such as HIV testing, condom use, and hormonal contraception—among adolescent girls and young women in Malawi compared to standard of care?	Adolescent girls and young women aged 15-24 years in Lilongwe, Malawi who were not pregnant but were sexually active or anticipated becoming sexually active	15-24 years	Marority unmarried	Female	Urban	Lilongwe	Health facility	Cluster randomized controlled trial (RCT)	Strong	Quantitative	Interviewer-administered surveys and service statistics (clinic cards)	Yes	Yes	1000	1000	Interventions 750 (three arms 250 each); control 253	0.13	Generalized linear models with an identity link and binomial distribution for comparing service uptake proportions. Generalized linear models with a log link and negative binomial distribution for comparing the mean number of services received.	Girl Power Malawi	Youth-friendly health services (YFHS) in three arms (1) YFS only (youth-focused space, more range of times, training on YFS and peer-educators to support), (2) YFS + behavioral intervention (12 monthly facility-led curriculum-driven small-group interactive sessions, (3) YFS + behavioral intervention + conditional cash transfer (monthly cash transfer for attending each behavioral intervention sess…	Not reported	youth friendly clinic services, small group sessions, conditional cash transfer	Trained clinicians, trained peer-educators, trained facilitators	12 months	Clinics and community	Enhancement, Social behavior change	Adolescent-responsive services, Financial incentives, Small-group education	Contraceptive uptake/use	Receipt of male/female condoms (service card)	Binary	Service statistics	Individual	RD / APD	Assigned to intervention (any of three arms) or control	N/A	N/A	0.27	51%-63%	Not reported	Significant (p<.05)	Positive	N/A	N/A	N/A
Rosenberg et al. (2018)	Comparing Youth Friendly Health Services to the Standard of Care through “Girl Power-Malawi”: A Quasi-Experimental Cohort Study	2018	Journal of Acquired Immune Deficiency Syndromes	Malawi	Does implementation of a youth-friendly health services (YFHS) model improve uptake of sexual and reproductive health services—such as HIV testing, condom use, and hormonal contraception—among adolescent girls and young women in Malawi compared to standard of care?	Adolescent girls and young women aged 15-24 years in Lilongwe, Malawi who were not pregnant but were sexually active or anticipated becoming sexually active	15-24 years	Marority unmarried	Female	Urban	Lilongwe	Health facility	Cluster randomized controlled trial (RCT)	Strong	Quantitative	Interviewer-administered surveys and service statistics (clinic cards)	Yes	Yes	1000	1000	Interventions 750 (three arms 250 each); control 254	0.13	Generalized linear models with an identity link and binomial distribution for comparing service uptake proportions. Generalized linear models with a log link and negative binomial distribution for comparing the mean number of services received.	Girl Power Malawi	Youth-friendly health services (YFHS) in three arms (1) YFS only (youth-focused space, more range of times, training on YFS and peer-educators to support), (2) YFS + behavioral intervention (12 monthly facility-led curriculum-driven small-group interactive sessions, (3) YFS + behavioral intervention + conditional cash transfer (monthly cash transfer for attending each behavioral intervention sess…	Not reported	youth friendly clinic services, small group sessions, conditional cash transfer	Trained clinicians, trained peer-educators, trained facilitators	12 months	Clinics and community	Enhancement, Social behavior change	Adolescent-responsive services, Financial incentives, Small-group education	Contraceptive uptake/use	Mean # times condoms received (service card)	Count	Service statistics	Individual	IRR / AIRR	Assigned to intervention (any of three arms) or control	N/A	N/A	7.9	6.0-10.5	Not reported	Significant (p<.05)	Positive	N/A	N/A	N/A
Rosenberg et al. (2018)	Comparing Youth Friendly Health Services to the Standard of Care through “Girl Power-Malawi”: A Quasi-Experimental Cohort Study	2018	Journal of Acquired Immune Deficiency Syndromes	Malawi	Does implementation of a youth-friendly health services (YFHS) model improve uptake of sexual and reproductive health services—such as HIV testing, condom use, and hormonal contraception—among adolescent girls and young women in Malawi compared to standard of care?	Adolescent girls and young women aged 15-24 years in Lilongwe, Malawi who were not pregnant but were sexually active or anticipated becoming sexually active	15-24 years	Marority unmarried	Female	Urban	Lilongwe	Health facility	Cluster randomized controlled trial (RCT)	Strong	Quantitative	Interviewer-administered surveys and service statistics (clinic cards)	Yes	Yes	1000	1000	Interventions 750 (three arms 250 each); control 255	0.13	Generalized linear models with an identity link and binomial distribution for comparing service uptake proportions. Generalized linear models with a log link and negative binomial distribution for comparing the mean number of services received.	Girl Power Malawi	Youth-friendly health services (YFHS) in three arms (1) YFS only (youth-focused space, more range of times, training on YFS and peer-educators to support), (2) YFS + behavioral intervention (12 monthly facility-led curriculum-driven small-group interactive sessions, (3) YFS + behavioral intervention + conditional cash transfer (monthly cash transfer for attending each behavioral intervention sess…	Not reported	youth friendly clinic services, small group sessions, conditional cash transfer	Trained clinicians, trained peer-educators, trained facilitators	12 months	Clinics and community	Enhancement, Social behavior change	Adolescent-responsive services, Financial incentives, Small-group education	Contraceptive uptake/use	Self-report current use of condoms	Binary	Service statistics	Individual	% diff (int vs. control)	Assigned to intervention (any of three arms) or control	N/A	N/A	0.23	Not reported	<.0001	Significant (p<.05)	Positive	N/A	N/A	N/A
Rosenberg et al. (2018)	Comparing Youth Friendly Health Services to the Standard of Care through “Girl Power-Malawi”: A Quasi-Experimental Cohort Study	2018	Journal of Acquired Immune Deficiency Syndromes	Malawi	Does implementation of a youth-friendly health services (YFHS) model improve uptake of sexual and reproductive health services—such as HIV testing, condom use, and hormonal contraception—among adolescent girls and young women in Malawi compared to standard of care?	Adolescent girls and young women aged 15-24 years in Lilongwe, Malawi who were not pregnant but were sexually active or anticipated becoming sexually active	15-24 years	Marority unmarried	Female	Urban	Lilongwe	Health facility	Cluster randomized controlled trial (RCT)	Strong	Quantitative	Interviewer-administered surveys and service statistics (clinic cards)	Yes	Yes	1000	1000	Interventions 750 (three arms 250 each); control 256	0.13	Generalized linear models with an identity link and binomial distribution for comparing service uptake proportions. Generalized linear models with a log link and negative binomial distribution for comparing the mean number of services received.	Girl Power Malawi	Youth-friendly health services (YFHS) in three arms (1) YFS only (youth-focused space, more range of times, training on YFS and peer-educators to support), (2) YFS + behavioral intervention (12 monthly facility-led curriculum-driven small-group interactive sessions, (3) YFS + behavioral intervention + conditional cash transfer (monthly cash transfer for attending each behavioral intervention sess…	Not reported	youth friendly clinic services, small group sessions, conditional cash transfer	Trained clinicians, trained peer-educators, trained facilitators	12 months	Clinics and community	Enhancement, Social behavior change	Adolescent-responsive services, Financial incentives, Small-group education	Contraceptive uptake/use	Receipt of dual methods at least once (service card)	Binary	Service statistics	Individual	RD / APD	Assigned to intervention (any of three arms) or control	N/A	N/A	0.33	29%-36%	Not reported	Significant (p<.05)	Positive	N/A	N/A	N/A
Rosenberg et al. (2018)	Comparing Youth Friendly Health Services to the Standard of Care through “Girl Power-Malawi”: A Quasi-Experimental Cohort Study	2018	Journal of Acquired Immune Deficiency Syndromes	Malawi	Does implementation of a youth-friendly health services (YFHS) model improve uptake of sexual and reproductive health services—such as HIV testing, condom use, and hormonal contraception—among adolescent girls and young women in Malawi compared to standard of care?	Adolescent girls and young women aged 15-24 years in Lilongwe, Malawi who were not pregnant but were sexually active or anticipated becoming sexually active	15-24 years	Marority unmarried	Female	Urban	Lilongwe	Health facility	Cluster randomized controlled trial (RCT)	Strong	Quantitative	Interviewer-administered surveys and service statistics (clinic cards)	Yes	Yes	1000	1000	Interventions 750 (three arms 250 each); control 257	0.13	Generalized linear models with an identity link and binomial distribution for comparing service uptake proportions. Generalized linear models with a log link and negative binomial distribution for comparing the mean number of services received.	Girl Power Malawi	Youth-friendly health services (YFHS) in three arms (1) YFS only (youth-focused space, more range of times, training on YFS and peer-educators to support), (2) YFS + behavioral intervention (12 monthly facility-led curriculum-driven small-group interactive sessions, (3) YFS + behavioral intervention + conditional cash transfer (monthly cash transfer for attending each behavioral intervention sess…	Not reported	youth friendly clinic services, small group sessions, conditional cash transfer	Trained clinicians, trained peer-educators, trained facilitators	12 months	Clinics and community	Enhancement, Social behavior change	Adolescent-responsive services, Financial incentives, Small-group education	Contraceptive uptake/use	Self-report current use of dual methods	Binary	Service statistics	Individual	% diff (int vs. control)	Assigned to intervention (any of three arms) or control	N/A	N/A	0.24	Not reported	<.0001	Significant (p<.05)	Positive	N/A	N/A	N/A
Silverman et al. (2023)	Effects of the reaching married adolescents program on modern contraceptive use and intimate partner violence: results of a cluster randomized controlled trial among married adolescent girls and their husbands in Dosso, Niger	2023	Reproductive Health	Niger	What are the effects of the Reaching Married Adolescents (RMA) program on modern contraceptive use and intimate partner violence among married adolescent girls in Niger?	Married adolescent girls aged 13–19 and their husbands in rural communities of the Dosso region	13-19 years	Married	Female	Rural	Dosso region	General population	Cluster randomized controlled trial (RCT)	Strong	Quantitative	Interviewer-administered household surveys	Yes	Yes	968	968	725 intervention arms, 243 control	0.12	Multilevel mixed-effects difference-in-difference Poisson regression models with nested random effects accounting for village-level clustering.	Reaching Married Adolescents (RMA) Project	Home visits by gender-matched community health workers (CHWs) (Arm 1), gender-segregated, group discussion sessions (Arm 2), and both approaches (Arm 3)	Based on theory of reasoned action	household visits and small group discussions	Trained CHWs and community facilitators	Twice monthly small groups for girls and once monthly for husbands, household visits monthly for girls and husbands, monthly community-level dialogues at village level	Community-based and home	Social behavior change	Engaging men and boys, Social norms & networks, Couple communication, Small-group education	Contraceptive uptake/use	Current modern family planning use	Binary	Baseline and 12-month endline	Individual	IRR (DiD)	Assigned to receive intervention (any of three arms) or control	N/A	N/A	2.33	1.41-3.87	0.001	Significant (p<.05)	Positive	N/A	N/A	N/A
Silverman et al. (2023)	Effects of the reaching married adolescents program on modern contraceptive use and intimate partner violence: results of a cluster randomized controlled trial among married adolescent girls and their husbands in Dosso, Niger	2023	Reproductive Health	Niger	What are the effects of the Reaching Married Adolescents (RMA) program on modern contraceptive use and intimate partner violence among married adolescent girls in Niger?	Married adolescent girls aged 13–19 and their husbands in rural communities of the Dosso region	13-19 years	Married	Female	Rural	Dosso region	General population	Cluster randomized controlled trial (RCT)	Strong	Quantitative	Interviewer-administered household surveys	Yes	Yes	968	968	726 intervention arms, 243 control	1.12	Multilevel mixed-effects difference-in-difference Poisson regression models with nested random effects accounting for village-level clustering.	Reaching Married Adolescents (RMA) Project	Home visits by gender-matched community health workers (CHWs) (Arm 1), gender-segregated, group discussion sessions (Arm 2), and both approaches (Arm 3)	Based on theory of reasoned action	household visits and small group discussions	Trained CHWs and community facilitators	Twice monthly small groups for girls and once monthly for husbands, household visits monthly for girls and husbands, monthly community-level dialogues at village level	Community-based and home	Social behavior change	Engaging men and boys, Social norms & networks, Couple communication, Small-group education	Contraceptive uptake/use	Current modern family planning use	Binary	Baseline and 12-month endline	Individual	IRR (DiD)	Assigned to receive intervention (arm 1 - home visits) or control	N/A	N/A	3.65	1.51-8.78	0.004	Significant (p<.05)	Positive	N/A	N/A	N/A
Silverman et al. (2023)	Effects of the reaching married adolescents program on modern contraceptive use and intimate partner violence: results of a cluster randomized controlled trial among married adolescent girls and their husbands in Dosso, Niger	2023	Reproductive Health	Niger	What are the effects of the Reaching Married Adolescents (RMA) program on modern contraceptive use and intimate partner violence among married adolescent girls in Niger?	Married adolescent girls aged 13–19 and their husbands in rural communities of the Dosso region	13-19 years	Married	Female	Rural	Dosso region	General population	Cluster randomized controlled trial (RCT)	Strong	Quantitative	Interviewer-administered household surveys	Yes	Yes	968	968	727 intervention arms, 243 control	2.12	Multilevel mixed-effects difference-in-difference Poisson regression models with nested random effects accounting for village-level clustering.	Reaching Married Adolescents (RMA) Project	Home visits by gender-matched community health workers (CHWs) (Arm 1), gender-segregated, group discussion sessions (Arm 2), and both approaches (Arm 3)	Based on theory of reasoned action	household visits and small group discussions	Trained CHWs and community facilitators	Twice monthly small groups for girls and once monthly for husbands, household visits monthly for girls and husbands, monthly community-level dialogues at village level	Community-based and home	Social behavior change	Engaging men and boys, Social norms & networks, Couple communication, Small-group education	Contraceptive uptake/use	Current modern family planning use	Binary	Baseline and 12-month endline	Individual	IRR (DiD)	Assigned to receive intervention (arm 2 - small groups) or control	N/A	N/A	1.42	0.84-2.41	0.19	Null (p>.1)	Null	N/A	N/A	N/A
Silverman et al. (2023)	Effects of the reaching married adolescents program on modern contraceptive use and intimate partner violence: results of a cluster randomized controlled trial among married adolescent girls and their husbands in Dosso, Niger	2023	Reproductive Health	Niger	What are the effects of the Reaching Married Adolescents (RMA) program on modern contraceptive use and intimate partner violence among married adolescent girls in Niger?	Married adolescent girls aged 13–19 and their husbands in rural communities of the Dosso region	13-19 years	Married	Female	Rural	Dosso region	General population	Cluster randomized controlled trial (RCT)	Strong	Quantitative	Interviewer-administered household surveys	Yes	Yes	968	968	728 intervention arms, 243 control	3.12	Multilevel mixed-effects difference-in-difference Poisson regression models with nested random effects accounting for village-level clustering.	Reaching Married Adolescents (RMA) Project	Home visits by gender-matched community health workers (CHWs) (Arm 1), gender-segregated, group discussion sessions (Arm 2), and both approaches (Arm 3)	Based on theory of reasoned action	household visits and small group discussions	Trained CHWs and community facilitators	Twice monthly small groups for girls and once monthly for husbands, household visits monthly for girls and husbands, monthly community-level dialogues at village level	Community-based and home	Social behavior change	Engaging men and boys, Social norms & networks, Couple communication, Small-group education	Contraceptive uptake/use	Current modern family planning use	Binary	Baseline and 12-month endline	Individual	IRR (DiD)	Assigned to receive intervention (arm 3 - combined) or control	N/A	N/A	2.99	1.69-5.32	<.001	Significant (p<.05)	Positive	N/A	N/A	N/A
Silverman et al. (2023)	Effects of the reaching married adolescents program on modern contraceptive use and intimate partner violence: results of a cluster randomized controlled trial among married adolescent girls and their husbands in Dosso, Niger	2023	Reproductive Health	Niger	What are the effects of the Reaching Married Adolescents (RMA) program on modern contraceptive use and intimate partner violence among married adolescent girls in Niger?	Married adolescent girls aged 13–19 and their husbands in rural communities of the Dosso region	13-19 years	Married	Female	Rural	Dosso region	General population	Cluster randomized controlled trial (RCT)	Strong	Quantitative	Interviewer-administered household surveys	Yes	Yes	968	968	729 intervention arms, 243 control	4.12	Multilevel mixed-effects difference-in-difference Poisson regression models with nested random effects accounting for village-level clustering.	Reaching Married Adolescents (RMA) Project	Home visits by gender-matched community health workers (CHWs) (Arm 1), gender-segregated, group discussion sessions (Arm 2), and both approaches (Arm 3)	Based on theory of reasoned action	household visits and small group discussions	Trained CHWs and community facilitators	Twice monthly small groups for girls and once monthly for husbands, household visits monthly for girls and husbands, monthly community-level dialogues at village level	Community-based and home	Social behavior change	Engaging men and boys, Social norms & networks, Couple communication, Small-group education	Other	IPV experience past 12 months	Binary	Baseline and 12-month endline	Individual	IRR (DiD)	Assigned to receive intervention (any of three arms) or control	N/A	N/A	0.57	0.29-1.13	0.11	Null (p>.1)	Null	N/A	N/A	N/A
Silverman et al. (2023)	Effects of the reaching married adolescents program on modern contraceptive use and intimate partner violence: results of a cluster randomized controlled trial among married adolescent girls and their husbands in Dosso, Niger	2023	Reproductive Health	Niger	What are the effects of the Reaching Married Adolescents (RMA) program on modern contraceptive use and intimate partner violence among married adolescent girls in Niger?	Married adolescent girls aged 13–19 and their husbands in rural communities of the Dosso region	13-19 years	Married	Female	Rural	Dosso region	General population	Cluster randomized controlled trial (RCT)	Strong	Quantitative	Interviewer-administered household surveys	Yes	Yes	968	968	730 intervention arms, 243 control	5.12	Multilevel mixed-effects difference-in-difference Poisson regression models with nested random effects accounting for village-level clustering.	Reaching Married Adolescents (RMA) Project	Home visits by gender-matched community health workers (CHWs) (Arm 1), gender-segregated, group discussion sessions (Arm 2), and both approaches (Arm 3)	Based on theory of reasoned action	household visits and small group discussions	Trained CHWs and community facilitators	Twice monthly small groups for girls and once monthly for husbands, household visits monthly for girls and husbands, monthly community-level dialogues at village level	Community-based and home	Social behavior change	Engaging men and boys, Social norms & networks, Couple communication, Small-group education	Other	IPV experience past 12 months	Binary	Baseline and 12-month endline	Individual	IRR (DiD)	Assigned to receive intervention (arm 1 - home visits) or control	N/A	N/A	1.39	0.49-3.95	0.54	Null (p>.1)	Null	N/A	N/A	N/A
Silverman et al. (2023)	Effects of the reaching married adolescents program on modern contraceptive use and intimate partner violence: results of a cluster randomized controlled trial among married adolescent girls and their husbands in Dosso, Niger	2023	Reproductive Health	Niger	What are the effects of the Reaching Married Adolescents (RMA) program on modern contraceptive use and intimate partner violence among married adolescent girls in Niger?	Married adolescent girls aged 13–19 and their husbands in rural communities of the Dosso region	13-19 years	Married	Female	Rural	Dosso region	General population	Cluster randomized controlled trial (RCT)	Strong	Quantitative	Interviewer-administered household surveys	Yes	Yes	968	968	731 intervention arms, 243 control	6.12	Multilevel mixed-effects difference-in-difference Poisson regression models with nested random effects accounting for village-level clustering.	Reaching Married Adolescents (RMA) Project	Home visits by gender-matched community health workers (CHWs) (Arm 1), gender-segregated, group discussion sessions (Arm 2), and both approaches (Arm 3)	Based on theory of reasoned action	household visits and small group discussions	Trained CHWs and community facilitators	Twice monthly small groups for girls and once monthly for husbands, household visits monthly for girls and husbands, monthly community-level dialogues at village level	Community-based and home	Social behavior change	Engaging men and boys, Social norms & networks, Couple communication, Small-group education	Other	IPV experience past 12 months	Binary	Baseline and 12-month endline	Individual	IRR (DiD)	Assigned to receive intervention (arm 2 - small groups) or control	N/A	N/A	0.4	0.18-0.88	0.02	Significant (p<.05)	Positive	N/A	N/A	N/A
Silverman et al. (2023)	Effects of the reaching married adolescents program on modern contraceptive use and intimate partner violence: results of a cluster randomized controlled trial among married adolescent girls and their husbands in Dosso, Niger	2023	Reproductive Health	Niger	What are the effects of the Reaching Married Adolescents (RMA) program on modern contraceptive use and intimate partner violence among married adolescent girls in Niger?	Married adolescent girls aged 13–19 and their husbands in rural communities of the Dosso region	13-19 years	Married	Female	Rural	Dosso region	General population	Cluster randomized controlled trial (RCT)	Strong	Quantitative	Interviewer-administered household surveys	Yes	Yes	968	968	732 intervention arms, 243 control	7.12	Multilevel mixed-effects difference-in-difference Poisson regression models with nested random effects accounting for village-level clustering.	Reaching Married Adolescents (RMA) Project	Home visits by gender-matched community health workers (CHWs) (Arm 1), gender-segregated, group discussion sessions (Arm 2), and both approaches (Arm 3)	Based on theory of reasoned action	household visits and small group discussions	Trained CHWs and community facilitators	Twice monthly small groups for girls and once monthly for husbands, household visits monthly for girls and husbands, monthly community-level dialogues at village level	Community-based and home	Social behavior change	Engaging men and boys, Social norms & networks, Couple communication, Small-group education	Other	IPV experience past 12 months	Binary	Baseline and 12-month endline	Individual	IRR (DiD)	Assigned to receive intervention (arm 3 - combined) or control	N/A	N/A	0.46	0.21-1.01	0.05	Marginally significant (p<.1)	Positive	N/A	N/A	N/A
Wondimagegene et al. (2023)	Effectiveness of peer-led education interventions on contraceptive use, unmet need, and demand among adolescent girls in Gedeo Zone, South Ethiopia: A cluster randomized controlled trial	2023	Global Health Action	Ethiopia	To evaluate the effectiveness of peer-led education interventions in improving contraceptive use, unmet needs, and demand among sexually active secondary school adolescent girls in Gedeo Zone, South Ethiopia.	Sexually active secondary school girls aged 15–19 in Gedeo Zone	15-19 years	Marority unmarried	Female	Peri-urban, Rural	Gedeo Zone, Southern Nations region	School	Cluster randomized controlled trial (RCT)	Strong	Quantitative	Structured questionnaires at baseline and 6-months post-intervention	Yes	Yes	224	224	113 intervention; 111 control	0.03	Difference-in-differences using Generalized Estimating Equations (GEE); adjusted Odds Ratios (AORs) reported	N/A	Trained peer educators provided weekly classroom-based education covering contraception, sexual health, and reproductive rights	Not reported	In-person, school-based peer-led sessions	Peer educators (students and teachers) trained by researchers	Weekly sessions over 6 months	Schools	Social behavior change	Peer-led approaches, School-based education	Contraceptive uptake/use	Current contraceptive use	Binary	Baseline and 6-month endline	Individual	ORR (DiD)	Assigned to receive intervention or control	N/A	N/A	8.73	3.66–20.83	0.01	Significant (p<.05)	Positive	N/A	N/A	N/A
Wondimagegene et al. (2023)	Effectiveness of peer-led education interventions on contraceptive use, unmet need, and demand among adolescent girls in Gedeo Zone, South Ethiopia: A cluster randomized controlled trial	2023	Global Health Action	Ethiopia	To evaluate the effectiveness of peer-led education interventions in improving contraceptive use, unmet needs, and demand among sexually active secondary school adolescent girls in Gedeo Zone, South Ethiopia.	Sexually active secondary school girls aged 15–19 in Gedeo Zone	15-19 years	Marority unmarried	Female	Peri-urban, Rural	Gedeo Zone, Southern Nations region	School	Cluster randomized controlled trial (RCT)	Strong	Quantitative	Structured questionnaires at baseline and 6-months post-intervention	Yes	Yes	224	224	114 intervention; 111 control	1.03	Difference-in-differences using Generalized Estimating Equations (GEE); adjusted Odds Ratios (AORs) reported	N/A	Trained peer educators provided weekly classroom-based education covering contraception, sexual health, and reproductive rights	Not reported	In-person, school-based peer-led sessions	Peer educators (students and teachers) trained by researchers	Weekly sessions over 6 months	Schools	Social behavior change	Peer-led approaches, School-based education	Unmet need	Unmet need for contraceptives	Binary	Baseline and 6-month endline	Individual	ORR (DiD)	Assigned to receive intervention or control	N/A	N/A	6.27	1.61–24.36	0.01	Significant (p<.05)	Positive	N/A	N/A	N/A
Wondimagegene et al. (2023)	Effectiveness of peer-led education interventions on contraceptive use, unmet need, and demand among adolescent girls in Gedeo Zone, South Ethiopia: A cluster randomized controlled trial	2023	Global Health Action	Ethiopia	To evaluate the effectiveness of peer-led education interventions in improving contraceptive use, unmet needs, and demand among sexually active secondary school adolescent girls in Gedeo Zone, South Ethiopia.	Sexually active secondary school girls aged 15–19 in Gedeo Zone	15-19 years	Marority unmarried	Female	Peri-urban, Rural	Gedeo Zone, Southern Nations region	School	Cluster randomized controlled trial (RCT)	Strong	Quantitative	Structured questionnaires at baseline and 6-months post-intervention	Yes	Yes	224	224	115 intervention; 111 control	2.03	Difference-in-differences using Generalized Estimating Equations (GEE); adjusted Odds Ratios (AORs) reported	N/A	Trained peer educators provided weekly classroom-based education covering contraception, sexual health, and reproductive rights	Not reported	In-person, school-based peer-led sessions	Peer educators (students and teachers) trained by researchers	Weekly sessions over 6 months	Schools	Social behavior change	Peer-led approaches, School-based education	Intention/desire/demand	Contraceptive demand	Binary	Baseline and 6-month endline	Individual	ORR (DiD)	Assigned to receive intervention or control	N/A	N/A	6.06	2.43–15.11	0.01	Significant (p<.05)	Positive	N/A	N/A	N/A
Erulkar and Tamrat (2014)	Evaluation of a reproductive health program to support married adolescent girls in rural Ethiopia	2014	African Journal of Reproductive Health	Ethiopia	What is the effect of a community-based reproductive health program on married adolescent girls' knowledge, attitudes, and use of reproductive health services in rural Ethiopia?	Married adolescent girls aged 13–17 in rural Amhara Region	12-24 years	Married	Female	Rural	Amhara	General population	Quasi-experimental (non-randomized comparison group)	Moderate	Quantitative	Midline and endline questionnaires (2 years apart)	No	Yes	1010	1010	624 no exposure; 107 married girls group only, 24 husbands group only, 255 both married girls & husbands groups	N/A	Descriptive statistics and significance testing (t-tests, chi-square)	Married Adolescent Girls (MAG) Program	Community-based program with health education, small groups, home visits, and community dialogue to improve RH knowledge, service use, and decision-making power	Locally adapted to cultural context; developed through community consultation	Group sessions and home visits	Community mentors and health extension workers	Weekly group sessions over 6 months	Community/home-based	Social behavior change	Interpersonal communication Social norms & networks Small-group education Engaging men and boys Couple communication Extension workers	Contraceptive uptake/use	Ever used family planning	Binary	Midline and endline	Individual	OR / AOR	Exposed to husbands and wives groups vs. not exposed to program	N/A	N/A	1.85	1.33-2.58	<.001	Significant (p<.05)	Positive	N/A	N/A	N/A
Erulkar and Tamrat (2014)	Evaluation of a reproductive health program to support married adolescent girls in rural Ethiopia	2014	African Journal of Reproductive Health	Ethiopia	What is the effect of a community-based reproductive health program on married adolescent girls' knowledge, attitudes, and use of reproductive health services in rural Ethiopia?	Married adolescent girls aged 13–17 in rural Amhara Region	12-24 years	Married	Female	Rural	Amhara	General population	Quasi-experimental (non-randomized comparison group)	Moderate	Quantitative	Midline and endline questionnaires (2 years apart)	No	Yes	1010	1010	625 no exposure; 107 married girls group only, 24 husbands group only, 255 both married girls & husbands groups	N/A	Descriptive statistics and significance testing (t-tests, chi-square)	Married Adolescent Girls (MAG) Program	Community-based program with health education, small groups, home visits, and community dialogue to improve RH knowledge, service use, and decision-making power	Locally adapted to cultural context; developed through community consultation	Group sessions and home visits	Community mentors and health extension workers	Weekly group sessions over 6 months	Community/home-based	Social behavior change	Interpersonal communication, Social norms & networks, Small-group education,	Contraceptive uptake/use	Ever used family planning	Binary	Midline and endline	Individual	OR / AOR	Exposed to wives groups only vs. not exposed to program	N/A	N/A	1.49	0.94-2.35	<.1	Marginally significant (p<.1)	Positive	N/A	N/A	N/A
Erulkar and Tamrat (2014)	Evaluation of a reproductive health program to support married adolescent girls in rural Ethiopia	2014	African Journal of Reproductive Health	Ethiopia	What is the effect of a community-based reproductive health program on married adolescent girls' knowledge, attitudes, and use of reproductive health services in rural Ethiopia?	Married adolescent girls aged 13–17 in rural Amhara Region	12-24 years	Married	Female	Rural	Amhara	General population	Quasi-experimental (non-randomized comparison group)	Moderate	Quantitative	Midline and endline questionnaires (2 years apart)	No	Yes	1010	1010	626 no exposure; 107 married girls group only, 24 husbands group only, 255 both married girls & husbands groups	N/A	Descriptive statistics and significance testing (t-tests, chi-square)	Married Adolescent Girls (MAG) Program	Community-based program with health education, small groups, home visits, and community dialogue to improve RH knowledge, service use, and decision-making power	Locally adapted to cultural context; developed through community consultation	Group sessions and home visits	Community mentors and health extension workers	Weekly group sessions over 6 months	Community/home-based	Social behavior change	Interpersonal communication, Social norms & networks, Small-group education, Engaging men and boys, Couple communication	Service use	Ever received couples VCT	Binary	Midline and endline	Individual	OR / AOR	Exposed to husbands and wives groups vs. not exposed to program	N/A	N/A	7.7	4.72-12.58	<.001	Significant (p<.05)	Positive	N/A	N/A	N/A
Erulkar and Tamrat (2014)	Evaluation of a reproductive health program to support married adolescent girls in rural Ethiopia	2014	African Journal of Reproductive Health	Ethiopia	What is the effect of a community-based reproductive health program on married adolescent girls' knowledge, attitudes, and use of reproductive health services in rural Ethiopia?	Married adolescent girls aged 13–17 in rural Amhara Region	12-24 years	Married	Female	Rural	Amhara	General population	Quasi-experimental (non-randomized comparison group)	Moderate	Quantitative	Midline and endline questionnaires (2 years apart)	No	Yes	1010	1010	627 no exposure; 107 married girls group only, 24 husbands group only, 255 both married girls & husbands groups	N/A	Descriptive statistics and significance testing (t-tests, chi-square)	Married Adolescent Girls (MAG) Program	Community-based program with health education, small groups, home visits, and community dialogue to improve RH knowledge, service use, and decision-making power	Locally adapted to cultural context; developed through community consultation	Group sessions and home visits	Community mentors and health extension workers	Weekly group sessions over 6 months	Community/home-based	Social behavior change	Interpersonal communication, Social norms & networks, Small-group education,	Service use	Ever received couples VCT	Binary	Midline and endline	Individual	OR / AOR	Exposed to wives groups only vs. not exposed to program	N/A	N/A	18.34	12.13-27.75	<.001	Significant (p<.05)	Positive	N/A	N/A	N/A
Erulkar and Tamrat (2014)	Evaluation of a reproductive health program to support married adolescent girls in rural Ethiopia	2014	African Journal of Reproductive Health	Ethiopia	What is the effect of a community-based reproductive health program on married adolescent girls' knowledge, attitudes, and use of reproductive health services in rural Ethiopia?	Married adolescent girls aged 13–17 in rural Amhara Region	12-24 years	Married	Female	Rural	Amhara	General population	Quasi-experimental (non-randomized comparison group)	Moderate	Quantitative	Midline and endline questionnaires (2 years apart)	No	Yes	1010	1010	628 no exposure; 107 married girls group only, 24 husbands group only, 255 both married girls & husbands groups	N/A	Descriptive statistics and significance testing (t-tests, chi-square)	Married Adolescent Girls (MAG) Program	Community-based program with health education, small groups, home visits, and community dialogue to improve RH knowledge, service use, and decision-making power	Locally adapted to cultural context; developed through community consultation	Group sessions and home visits	Community mentors and health extension workers	Weekly group sessions over 6 months	Community/home-based	Social behavior change	Interpersonal communication, Social norms & networks, Small-group education, Engaging men and boys, Couple communication	Other	Been beaten in last 3 months	Binary	Midline and endline	Individual	OR / AOR	Exposed to husbands and wives groups vs. not exposed to program	N/A	N/A	1.66	0.99-2.76	<.1	Significant (p<.05)	Positive	N/A	N/A	N/A
Erulkar and Tamrat (2014)	Evaluation of a reproductive health program to support married adolescent girls in rural Ethiopia	2014	African Journal of Reproductive Health	Ethiopia	What is the effect of a community-based reproductive health program on married adolescent girls' knowledge, attitudes, and use of reproductive health services in rural Ethiopia?	Married adolescent girls aged 13–17 in rural Amhara Region	12-24 years	Married	Female	Rural	Amhara	General population	Quasi-experimental (non-randomized comparison group)	Moderate	Quantitative	Midline and endline questionnaires (2 years apart)	No	Yes	1010	1010	629 no exposure; 107 married girls group only, 24 husbands group only, 255 both married girls & husbands groups	N/A	Descriptive statistics and significance testing (t-tests, chi-square)	Married Adolescent Girls (MAG) Program	Community-based program with health education, small groups, home visits, and community dialogue to improve RH knowledge, service use, and decision-making power	Locally adapted to cultural context; developed through community consultation	Group sessions and home visits	Community mentors and health extension workers	Weekly group sessions over 6 months	Community/home-based	Social behavior change	Interpersonal communication, Social norms & networks, Small-group education,	Other	Been beaten in last 3 months	Binary	Midline and endline	Individual	OR / AOR	Exposed to wives groups only vs. not exposed to program	N/A	N/A	0.84	0.55-1.28	Not reported	Null (p>.1)	Null	N/A	N/A	N/A
Erulkar and Tamrat (2014)	Evaluation of a reproductive health program to support married adolescent girls in rural Ethiopia	2014	African Journal of Reproductive Health	Ethiopia	What is the effect of a community-based reproductive health program on married adolescent girls' knowledge, attitudes, and use of reproductive health services in rural Ethiopia?	Married adolescent girls aged 13–17 in rural Amhara Region	12-24 years	Married	Female	Rural	Amhara	General population	Quasi-experimental (non-randomized comparison group)	Moderate	Quantitative	Midline and endline questionnaires (2 years apart)	No	Yes	1010	1010	630 no exposure; 107 married girls group only, 24 husbands group only, 255 both married girls & husbands groups	N/A	Descriptive statistics and significance testing (t-tests, chi-square)	Married Adolescent Girls (MAG) Program	Community-based program with health education, small groups, home visits, and community dialogue to improve RH knowledge, service use, and decision-making power	Locally adapted to cultural context; developed through community consultation	Group sessions and home visits	Community mentors and health extension workers	Weekly group sessions over 6 months	Community/home-based	Social behavior change	Interpersonal communication, Social norms & networks, Small-group education, Engaging men and boys, Couple communication	Other	Husband helped with housework	Binary	Midline and endline	Individual	OR / AOR	Exposed to husbands and wives groups vs. not exposed to program	N/A	N/A	2.6	1.67-4.04	<.001	Significant (p<.05)	Positive	N/A	N/A	N/A
Erulkar and Tamrat (2014)	Evaluation of a reproductive health program to support married adolescent girls in rural Ethiopia	2014	African Journal of Reproductive Health	Ethiopia	What is the effect of a community-based reproductive health program on married adolescent girls' knowledge, attitudes, and use of reproductive health services in rural Ethiopia?	Married adolescent girls aged 13–17 in rural Amhara Region	12-24 years	Married	Female	Rural	Amhara	General population	Quasi-experimental (non-randomized comparison group)	Moderate	Quantitative	Midline and endline questionnaires (2 years apart)	No	Yes	1010	1010	631 no exposure; 107 married girls group only, 24 husbands group only, 255 both married girls & husbands groups	N/A	Descriptive statistics and significance testing (t-tests, chi-square)	Married Adolescent Girls (MAG) Program	Community-based program with health education, small groups, home visits, and community dialogue to improve RH knowledge, service use, and decision-making power	Locally adapted to cultural context; developed through community consultation	Group sessions and home visits	Community mentors and health extension workers	Weekly group sessions over 6 months	Community/home-based	Social behavior change	Interpersonal communication, Social norms & networks, Small-group education,	Other	Husband helped with housework	Binary	Midline and endline	Individual	OR / AOR	Exposed to wives groups only vs. not exposed to program	N/A	N/A	8.36	5.76-12.15	<.001	Significant (p<.05)	Positive	N/A	N/A	N/A
Erulkar and Tamrat (2014)	Evaluation of a reproductive health program to support married adolescent girls in rural Ethiopia	2014	African Journal of Reproductive Health	Ethiopia	What is the effect of a community-based reproductive health program on married adolescent girls' knowledge, attitudes, and use of reproductive health services in rural Ethiopia?	Married adolescent girls aged 13–17 in rural Amhara Region	12-24 years	Married	Female	Rural	Amhara	General population	Quasi-experimental (non-randomized comparison group)	Moderate	Quantitative	Midline and endline questionnaires (2 years apart)	No	Yes	1010	1010	632 no exposure; 107 married girls group only, 24 husbands group only, 255 both married girls & husbands groups	N/A	Descriptive statistics and significance testing (t-tests, chi-square)	Married Adolescent Girls (MAG) Program	Community-based program with health education, small groups, home visits, and community dialogue to improve RH knowledge, service use, and decision-making power	Locally adapted to cultural context; developed through community consultation	Group sessions and home visits	Community mentors and health extension workers	Weekly group sessions over 6 months	Community/home-based	Social behavior change	Interpersonal communication, Social norms & networks, Small-group education, Engaging men and boys, Couple communication	Service use	Husband accompanied wife to clinic	Binary	Midline and endline	Individual	OR / AOR	Exposed to husbands and wives groups vs. not exposed to program	N/A	N/A	1.05	0.68-1.61	Not reported	Null (p>.1)	Null	N/A	N/A	N/A
Erulkar and Tamrat (2014)	Evaluation of a reproductive health program to support married adolescent girls in rural Ethiopia	2014	African Journal of Reproductive Health	Ethiopia	What is the effect of a community-based reproductive health program on married adolescent girls' knowledge, attitudes, and use of reproductive health services in rural Ethiopia?	Married adolescent girls aged 13–17 in rural Amhara Region	12-24 years	Married	Female	Rural	Amhara	General population	Quasi-experimental (non-randomized comparison group)	Moderate	Quantitative	Midline and endline questionnaires (2 years apart)	No	Yes	1010	1010	633 no exposure; 107 married girls group only, 24 husbands group only, 255 both married girls & husbands groups	N/A	Descriptive statistics and significance testing (t-tests, chi-square)	Married Adolescent Girls (MAG) Program	Community-based program with health education, small groups, home visits, and community dialogue to improve RH knowledge, service use, and decision-making power	Locally adapted to cultural context; developed through community consultation	Group sessions and home visits	Community mentors and health extension workers	Weekly group sessions over 6 months	Community/home-based	Social behavior change	Interpersonal communication, Social norms & networks, Small-group education,	Service use	Husband accompanied wife to clinic	Binary	Midline and endline	Individual	OR / AOR	Exposed to wives groups only vs. not exposed to program	N/A	N/A	1.69	1.24-2.30	<.01	Significant (p<.05)	Positive	N/A	N/A	N/A
Shakya et al. (2020)	Social network and social normative characteristics of married female adolescents in Dosso, Niger: Associations with modern contraceptive use	2020	Global Public Health	Niger	How are social network and social normative characteristics associated with modern contraceptive use among married adolescent girls in Dosso, Niger?	Married adolescent girls aged 13–19 in Dosso, Niger	13-19 years	Married	Female	Rural	Dosso region	General population	Cross-sectional	Weak	Quantitative	Cross-sectional survey with egocentric network data	No	Yes	402	402	251 alters	N/A	Logistic regression, network analysis, multivariable modeling	N/A	Social networks and social network attributes	N/A	N/A	N/A	N/A	N/A	Social behavior change	Social norms & networks	Contraceptive uptake/use	Ever use of FP	Binary	N/A	Individual	Beta	Reported belief that alter supports girls use of FP	N/A	N/A	0.99	0.35	<.001	Significant (p<.05)	Positive
Bhandari et al. (2023)	Findings from a mixed-methods evaluation of a multi-level adolescent and youth reproductive and maternal health intervention in Karnali Province, Nepal	2023	BMC Women's Health	Nepal	Does the Healthy Transitions program influence reproductive, maternal, newborn health (RMNH) knowledge, attitudes, and behaviors—including contraceptive uptake—among adolescent girls and young women in Karnali Province?	Married and unmarried adolescent girls and young women (AGYW) aged 15–24 participating in cohort 1 of the intervention	15-24 years	Mixed	Female	Peri-urban, Rural	Karnali Province (Jajarkot, Surkhet, Dailekh, Kalikot)	Other	Pre/post without comparison group	Weak	Mixed Methods	Structured baseline and endline surveys; focus group discussions; key informant interviews	Yes	No	786	786	786 baselie; 565 endline	0.28	Pooled linear regressions for indicator change; NVivo thematic analysis for qualitative data	Healthy Transitions for Nepali Youth	Multi-level strategy including: Individual: AGYW “safe-space” small group sessions with curriculum and games (24 sessions); Interpersonal: Home visits engaging families and husbands via videos (target 6 visits); Community: Monthly dialogues, street dramas, quiz events; System: Adolescent-friendly health facility training and quality assessments	Not reported	In-person group sessions, home visits, community events, health facility strengthening	Save the Children with government and local NGOs	AGYW groups: 24 fortnightly sessions (12 months); Home visits: ~1–2 per month (variable); Community events: ~4/month plus biannual public events; Facility training: conducted once with quarterly follow-up	Schools, homes, community, health facilities	Social behavior change, Enhancement	Small-group education, Engaging men and boys, Social norms & networks, Adolescent-responsive services	Contraceptive uptake/use	Modern contraceptive prevalence rate	Proportion	Baseline and endline	Individual	% change (pre vs. post)	Ever-married girls at baseline compared to endline	N/A	N/A	0.07	Not reported	<.01	Significant (p<.05)	Positive	N/A	N/A	N/A
Bhandari et al. (2023)	Findings from a mixed-methods evaluation of a multi-level adolescent and youth reproductive and maternal health intervention in Karnali Province, Nepal	2023	BMC Women's Health	Nepal	Does the Healthy Transitions program influence reproductive, maternal, newborn health (RMNH) knowledge, attitudes, and behaviors—including contraceptive uptake—among adolescent girls and young women in Karnali Province?	Married and unmarried adolescent girls and young women (AGYW) aged 15–24 participating in cohort 1 of the intervention	15-24 years	Mixed	Female	Peri-urban, Rural	Karnali Province (Jajarkot, Surkhet, Dailekh, Kalikot)	Other	Pre/post without comparison group	Weak	Mixed Methods	Structured baseline and endline surveys; focus group discussions; key informant interviews	Yes	No	786	786	786 baselie; 565 endline	0.28	Pooled linear regressions for indicator change; NVivo thematic analysis for qualitative data	Healthy Transitions for Nepali Youth	Multi-level strategy including: Individual: AGYW “safe-space” small group sessions with curriculum and games (24 sessions); Interpersonal: Home visits engaging families and husbands via videos (target 6 visits); Community: Monthly dialogues, street dramas, quiz events; System: Adolescent-friendly health facility training and quality assessments	Not reported	In-person group sessions, home visits, community events, health facility strengthening	Save the Children with government and local NGOs	AGYW groups: 24 fortnightly sessions (12 months); Home visits: ~1–2 per month (variable); Community events: ~4/month plus biannual public events; Facility training: conducted once with quarterly follow-up	Schools, homes, community, health facilities	Social behavior change, Enhancement	Small-group education, Engaging men and boys, Social norms & networks, Adolescent-responsive services	Contraceptive uptake/use	Any contraceptive prevalence rate	Proportion	Baseline and endline	Individual	% change (pre vs. post)	Ever-married girls at baseline compared to endline	N/A	N/A	0.09	Not reported	<.05	Significant (p<.05)	Positive	N/A	N/A	N/A
Bhandari et al. (2023)	Findings from a mixed-methods evaluation of a multi-level adolescent and youth reproductive and maternal health intervention in Karnali Province, Nepal	2023	BMC Women's Health	Nepal	Does the Healthy Transitions program influence reproductive, maternal, newborn health (RMNH) knowledge, attitudes, and behaviors—including contraceptive uptake—among adolescent girls and young women in Karnali Province?	Married and unmarried adolescent girls and young women (AGYW) aged 15–24 participating in cohort 1 of the intervention	15-24 years	Mixed	Female	Peri-urban, Rural	Karnali Province (Jajarkot, Surkhet, Dailekh, Kalikot)	Other	Pre/post without comparison group	Weak	Mixed Methods	Structured baseline and endline surveys; focus group discussions; key informant interviews	Yes	No	786	786	786 baselie; 565 endline	0.28	Pooled linear regressions for indicator change; NVivo thematic analysis for qualitative data	Healthy Transitions for Nepali Youth	Multi-level strategy including: Individual: AGYW “safe-space” small group sessions with curriculum and games (24 sessions); Interpersonal: Home visits engaging families and husbands via videos (target 6 visits); Community: Monthly dialogues, street dramas, quiz events; System: Adolescent-friendly health facility training and quality assessments	Not reported	In-person group sessions, home visits, community events, health facility strengthening	Save the Children with government and local NGOs	AGYW groups: 24 fortnightly sessions (12 months); Home visits: ~1–2 per month (variable); Community events: ~4/month plus biannual public events; Facility training: conducted once with quarterly follow-up	Schools, homes, community, health facilities	Social behavior change, Enhancement	Small-group education, Engaging men and boys, Social norms & networks, Adolescent-responsive services	Norms/approval	Perceived community support to delay first pregnancies	Proportion	Baseline and endline	Individual	% change (pre vs. post)	Girls at baseline compared to endline	N/A	N/A	0.22	Not reported	<.001	Significant (p<.05)	Positive	N/A	N/A	N/A
Bhandari et al. (2023)	Findings from a mixed-methods evaluation of a multi-level adolescent and youth reproductive and maternal health intervention in Karnali Province, Nepal	2023	BMC Women's Health	Nepal	Does the Healthy Transitions program influence reproductive, maternal, newborn health (RMNH) knowledge, attitudes, and behaviors—including contraceptive uptake—among adolescent girls and young women in Karnali Province?	Married and unmarried adolescent girls and young women (AGYW) aged 15–24 participating in cohort 1 of the intervention	15-24 years	Mixed	Female	Peri-urban, Rural	Karnali Province (Jajarkot, Surkhet, Dailekh, Kalikot)	Other	Pre/post without comparison group	Weak	Mixed Methods	Structured baseline and endline surveys; focus group discussions; key informant interviews	Yes	No	786	786	786 baselie; 565 endline	0.28	Pooled linear regressions for indicator change; NVivo thematic analysis for qualitative data	Healthy Transitions for Nepali Youth	Multi-level strategy including: Individual: AGYW “safe-space” small group sessions with curriculum and games (24 sessions); Interpersonal: Home visits engaging families and husbands via videos (target 6 visits); Community: Monthly dialogues, street dramas, quiz events; System: Adolescent-friendly health facility training and quality assessments	Not reported	In-person group sessions, home visits, community events, health facility strengthening	Save the Children with government and local NGOs	AGYW groups: 24 fortnightly sessions (12 months); Home visits: ~1–2 per month (variable); Community events: ~4/month plus biannual public events; Facility training: conducted once with quarterly follow-up	Schools, homes, community, health facilities	Social behavior change, Enhancement	Small-group education, Engaging men and boys, Social norms & networks, Adolescent-responsive services	Norms/approval	Perceived community support to space births	Proportion	Baseline and endline	Individual	% change (pre vs. post)	Girls at baseline compared to endline	N/A	N/A	0.2	Not reported	<.001	Significant (p<.05)	Positive	N/A	N/A	N/A
Bhandari et al. (2023)	Findings from a mixed-methods evaluation of a multi-level adolescent and youth reproductive and maternal health intervention in Karnali Province, Nepal	2023	BMC Women's Health	Nepal	Does the Healthy Transitions program influence reproductive, maternal, newborn health (RMNH) knowledge, attitudes, and behaviors—including contraceptive uptake—among adolescent girls and young women in Karnali Province?	Married and unmarried adolescent girls and young women (AGYW) aged 15–24 participating in cohort 1 of the intervention	15-24 years	Mixed	Female	Peri-urban, Rural	Karnali Province (Jajarkot, Surkhet, Dailekh, Kalikot)	Other	Pre/post without comparison group	Weak	Mixed Methods	Structured baseline and endline surveys; focus group discussions; key informant interviews	Yes	No	786	786	786 baselie; 565 endline	0.28	Pooled linear regressions for indicator change; NVivo thematic analysis for qualitative data	Healthy Transitions for Nepali Youth	Multi-level strategy including: Individual: AGYW “safe-space” small group sessions with curriculum and games (24 sessions); Interpersonal: Home visits engaging families and husbands via videos (target 6 visits); Community: Monthly dialogues, street dramas, quiz events; System: Adolescent-friendly health facility training and quality assessments	Not reported	In-person group sessions, home visits, community events, health facility strengthening	Save the Children with government and local NGOs	AGYW groups: 24 fortnightly sessions (12 months); Home visits: ~1–2 per month (variable); Community events: ~4/month plus biannual public events; Facility training: conducted once with quarterly follow-up	Schools, homes, community, health facilities	Social behavior change, Enhancement	Small-group education, Engaging men and boys, Social norms & networks, Adolescent-responsive services	Norms/approval	Perceived family support to delay first pregnancies	Proportion	Baseline and endline	Individual	% change (pre vs. post)	Girls at baseline compared to endline	N/A	N/A	0.32	Not reported	<.001	Significant (p<.05)	Positive	N/A	N/A	N/A
Bhandari et al. (2023)	Findings from a mixed-methods evaluation of a multi-level adolescent and youth reproductive and maternal health intervention in Karnali Province, Nepal	2023	BMC Women's Health	Nepal	Does the Healthy Transitions program influence reproductive, maternal, newborn health (RMNH) knowledge, attitudes, and behaviors—including contraceptive uptake—among adolescent girls and young women in Karnali Province?	Married and unmarried adolescent girls and young women (AGYW) aged 15–24 participating in cohort 1 of the intervention	15-24 years	Mixed	Female	Peri-urban, Rural	Karnali Province (Jajarkot, Surkhet, Dailekh, Kalikot)	Other	Pre/post without comparison group	Weak	Mixed Methods	Structured baseline and endline surveys; focus group discussions; key informant interviews	Yes	No	786	786	786 baselie; 565 endline	0.28	Pooled linear regressions for indicator change; NVivo thematic analysis for qualitative data	Healthy Transitions for Nepali Youth	Multi-level strategy including: Individual: AGYW “safe-space” small group sessions with curriculum and games (24 sessions); Interpersonal: Home visits engaging families and husbands via videos (target 6 visits); Community: Monthly dialogues, street dramas, quiz events; System: Adolescent-friendly health facility training and quality assessments	Not reported	In-person group sessions, home visits, community events, health facility strengthening	Save the Children with government and local NGOs	AGYW groups: 24 fortnightly sessions (12 months); Home visits: ~1–2 per month (variable); Community events: ~4/month plus biannual public events; Facility training: conducted once with quarterly follow-up	Schools, homes, community, health facilities	Social behavior change, Enhancement	Small-group education, Engaging men and boys, Social norms & networks, Adolescent-responsive services	Norms/approval	Perceived family support to space births	Proportion	Baseline and endline	Individual	% change (pre vs. post)	Girls at baseline compared to endline	N/A	N/A	0.33	Not reported	<.001	Significant (p<.05)	Positive	N/A	N/A	N/A
Bhandari et al. (2023)	Findings from a mixed-methods evaluation of a multi-level adolescent and youth reproductive and maternal health intervention in Karnali Province, Nepal	2023	BMC Women's Health	Nepal	Does the Healthy Transitions program influence reproductive, maternal, newborn health (RMNH) knowledge, attitudes, and behaviors—including contraceptive uptake—among adolescent girls and young women in Karnali Province?	Married and unmarried adolescent girls and young women (AGYW) aged 15–24 participating in cohort 1 of the intervention	15-24 years	Mixed	Female	Peri-urban, Rural	Karnali Province (Jajarkot, Surkhet, Dailekh, Kalikot)	Other	Pre/post without comparison group	Weak	Mixed Methods	Structured baseline and endline surveys; focus group discussions; key informant interviews	Yes	No	786	786	786 baselie; 565 endline	0.28	Pooled linear regressions for indicator change; NVivo thematic analysis for qualitative data	Healthy Transitions for Nepali Youth	Multi-level strategy including: Individual: AGYW “safe-space” small group sessions with curriculum and games (24 sessions); Interpersonal: Home visits engaging families and husbands via videos (target 6 visits); Community: Monthly dialogues, street dramas, quiz events; System: Adolescent-friendly health facility training and quality assessments	Not reported	In-person group sessions, home visits, community events, health facility strengthening	Save the Children with government and local NGOs	AGYW groups: 24 fortnightly sessions (12 months); Home visits: ~1–2 per month (variable); Community events: ~4/month plus biannual public events; Facility training: conducted once with quarterly follow-up	Schools, homes, community, health facilities	Social behavior change, Enhancement	Small-group education, Engaging men and boys, Social norms & networks, Adolescent-responsive services	Norms/approval	Perceived provider support to delay first pregnancies	Proportion	Baseline and endline	Individual	% change (pre vs. post)	Girls at baseline compared to endline	N/A	N/A	0.15	Not reported	<.001	Significant (p<.05)	Positive	N/A	N/A	N/A
Bhandari et al. (2023)	Findings from a mixed-methods evaluation of a multi-level adolescent and youth reproductive and maternal health intervention in Karnali Province, Nepal	2023	BMC Women's Health	Nepal	Does the Healthy Transitions program influence reproductive, maternal, newborn health (RMNH) knowledge, attitudes, and behaviors—including contraceptive uptake—among adolescent girls and young women in Karnali Province?	Married and unmarried adolescent girls and young women (AGYW) aged 15–24 participating in cohort 1 of the intervention	15-24 years	Mixed	Female	Peri-urban, Rural	Karnali Province (Jajarkot, Surkhet, Dailekh, Kalikot)	Other	Pre/post without comparison group	Weak	Mixed Methods	Structured baseline and endline surveys; focus group discussions; key informant interviews	Yes	No	786	786	786 baselie; 565 endline	0.28	Pooled linear regressions for indicator change; NVivo thematic analysis for qualitative data	Healthy Transitions for Nepali Youth	Multi-level strategy including: Individual: AGYW “safe-space” small group sessions with curriculum and games (24 sessions); Interpersonal: Home visits engaging families and husbands via videos (target 6 visits); Community: Monthly dialogues, street dramas, quiz events; System: Adolescent-friendly health facility training and quality assessments	Not reported	In-person group sessions, home visits, community events, health facility strengthening	Save the Children with government and local NGOs	AGYW groups: 24 fortnightly sessions (12 months); Home visits: ~1–2 per month (variable); Community events: ~4/month plus biannual public events; Facility training: conducted once with quarterly follow-up	Schools, homes, community, health facilities	Social behavior change, Enhancement	Small-group education, Engaging men and boys, Social norms & networks, Adolescent-responsive services	Norms/approval	Perceived provider support to space births	Proportion	Baseline and endline	Individual	% change (pre vs. post)	Girls at baseline compared to endline	N/A	N/A	0.09	Not reported	<.001	Significant (p<.05)	Positive	N/A	N/A	N/A
Borovac-Pinheiro et al. (2019)	Empowering Adolescent Mothers in the Choice of Contraceptive Methods at the Postpartum Period: Avoiding a Subsequent Pregnancy	2019	Revista Brasileira de Ginecologia e Obstetrícia (RBGO)	Brazil	Does a structured educational intervention increase postpartum contraceptive uptake among adolescent mothers?	Adolescent mothers who delivered at a public maternity hospital in Brazil	10-19 years	Mixed	Female	Urban	Not reported	Health facility	Retrospective observational program evaluation	Very weak	Quantitative	Health records before group intervention and during group intervention	No	Yes	129	129	control sample size not reported	N/A	Chi-square test, Student’s t-test, p-values	N/A	Structured contraceptive counseling and provision of educational materials prior to hospital discharge for youth maternity patients	Designed for adolescent mothers, delivered during postpartum hospitalization	In-person counseling session	Hospital-based health professionals	One session before discharge	Public maternity hospital	Enhancement	Integrated service delivery, Adolescent-responsive services	Contraceptive method	Uptake of IUD	Proportion	Before intervention and during intervention	Individual	% change (pre vs. post)	AYA delivering before intervention began (historical control) vs. intervention deliverying during intervention (treatment)	N/A	N/A	0.26	Not reported	Not reported	Not reported	Not reported	N/A	N/A	N/A
Borovac-Pinheiro, 2020	Empowering Adolescent Mothers in the Choice of Contraceptive Methods at the Postpartum Period: Avoiding a Subsequent Pregnancy	2019	Revista Brasileira de Ginecologia e Obstetrícia (RBGO)	Brazil	Does a structured educational intervention increase postpartum contraceptive uptake among adolescent mothers?	Adolescent mothers who delivered at a public maternity hospital in Brazil	10-19 years	Mixed	Female	Urban	Not reported	Health facility	Retrospective observational program evaluation	Very weak	Quantitative	Health records before group intervention and during group intervention	No	Yes	129	129	control sample size not reported	N/A	Chi-square test, Student’s t-test, p-values	N/A	Structured contraceptive counseling and provision of educational materials prior to hospital discharge for youth maternity patients	Designed for adolescent mothers, delivered during postpartum hospitalization	In-person counseling session	Hospital-based health professionals	One session before discharge	Public maternity hospital	Enhancement	Integrated service delivery, Adolescent-responsive services	Contraceptive method	Uptake of DMPA	Proportion	Before intervention and during intervention	Individual	% change (pre vs. post)	AYA delivering before intervention began (historical control) vs. intervention deliverying during intervention (treatment)	N/A	N/A	-0.37	Not reported	Not reported	Not reported	Not reported	N/A	N/A	N/A
Borovac-Pinheiro, 2021	Empowering Adolescent Mothers in the Choice of Contraceptive Methods at the Postpartum Period: Avoiding a Subsequent Pregnancy	2019	Revista Brasileira de Ginecologia e Obstetrícia (RBGO)	Brazil	Does a structured educational intervention increase postpartum contraceptive uptake among adolescent mothers?	Adolescent mothers who delivered at a public maternity hospital in Brazil	10-19 years	Mixed	Female	Urban	Not reported	Health facility	Retrospective observational program evaluation	Very weak	Quantitative	Health records before group intervention and during group intervention	No	Yes	129	129	control sample size not reported	N/A	Chi-square test, Student’s t-test, p-values	N/A	Structured contraceptive counseling and provision of educational materials prior to hospital discharge for youth maternity patients	Designed for adolescent mothers, delivered during postpartum hospitalization	In-person counseling session	Hospital-based health professionals	One session before discharge	Public maternity hospital	Enhancement	Integrated service delivery, Adolescent-responsive services	Contraceptive method	Uptake of other method	Proportion	Before intervention and during intervention	Individual	% change (pre vs. post)	AYA delivering before intervention began (historical control) vs. intervention deliverying during intervention (treatment)	N/A	N/A	0.16	Not reported	Not reported	Not reported	Not reported	N/A	N/A	N/A
Brooks et al. (2019)	Can community health workers increase modern contraceptive use among young married women? A cross-sectional study in rural Niger	Include	Reproductive Health	Niger	Does interaction with community health workers increase modern contraceptive use among young married women in rural Niger?	Married women aged 13–19 years in rural Niger	13-19 years	Married	Female	Rural	Zinder	General population	Cross-sectional	Weak	Quantitative	Interviewer-administered household survey	No	Yes	956	956	89 exposed to relais visit past 3 months; 867 not exposed	N/A	Multivariate logistic regression	N/A	Visits by community health workers (relais) providing family planning information and services	N/A	In-person home visits	CHWs	Not reported	Household	Supply & service delivery	Extension worker	Contraceptive uptake/use	Current use of modern contraceptive methods	Binary	N/A	Individual	OR / AOR	Exposed to relais visit past 3 months vs. not exposed	N/A	N/A	1.94	1.07-3.51	0.03	Significant (p<.05)	Positive	N/A	N/A	N/A
Jonas et al. (2022)	Participation in an HIV prevention intervention and access to and use of contraceptives among young women: A cross sectional analysis in six South African districts	2022	Contraception	South Africa	Is participation in a combination HIV-prevention intervention associated with increased access to and use of condoms and other modern contraceptives among women aged 15–24?	Young women aged 15–24 years in six South African districts participating in an HIV prevention intervention	15-24 years	Not reported	Female	Urban, Rural	South Africa (6 districts across provinces)	General population	Cross-sectional	Weak	Quantitative	Interviewer-administered survey	No	Yes	4339	4339	2257 participated; 2142 did not participate	N/A	Logistic regression with adjustment for covariates and clustering	HERStory	Multi-sectoral HIV prevention program including biomedical, behavioral, and structural components (such as access to contraceptives, education, and empowerment)	National adaptation of DREAMS programming in South African districts	Multi-component, community-based and facility-linked services	Local NGOs, community workers, healthcare providers	Ongoing intervention	Community, schools, and health facilities	Social behavior change	Peer-led approaches, School-based education, Small-group education, Supply, Other	Contraceptive uptake/use	Use of contraceptives other than condoms at last sex	Binary	N/A	Individual	PR / APR	Participated in HERStory intervention	N/A	N/A	1.36	1.21-1.53	<.001	Significant (p<.05)	Positive	N/A	N/A	N/A
Jonas et al. (2022)	Participation in an HIV prevention intervention and access to and use of contraceptives among young women: A cross sectional analysis in six South African districts	2022	Contraception	South Africa	Is participation in a combination HIV-prevention intervention associated with increased access to and use of condoms and other modern contraceptives among women aged 15–24?	Young women aged 15–24 years in six South African districts participating in an HIV prevention intervention	15-24 years	Not reported	Female	Urban, Rural	South Africa (6 districts across provinces)	General population	Cross-sectional	Weak	Quantitative	Interviewer-administered survey	No	Yes	4339	4339	2258 participated; 2142 did not participate	N/A	Logistic regression with adjustment for covariates and clustering	HERStory	Multi-sectoral HIV prevention program including biomedical, behavioral, and structural components (such as access to contraceptives, education, and empowerment)	National adaptation of DREAMS programming in South African districts	Multi-component, community-based and facility-linked services	Local NGOs, community workers, healthcare providers	Ongoing intervention	Community, schools, and health facilities	Social behavior change	Peer-led approaches, School-based education, Small-group education, Supply, Other	Contraceptive uptake/use	Use of dual contraception at last sex	Binary	N/A	Individual	PR / APR	Participated in HERStory intervention	N/A	N/A	1.45	1.26-1.68	<.001	Significant (p<.05)	Positive	N/A	N/A	N/A
Kabir et al. (2015)	Female unmarried adolescents' knowledge on selected reproductive health issues in two low performing areas of Bangladesh: an evaluation study	2015	BMC Public Health	Bangladesh	Does a peer-led intervention improve knowledge on menstruation, reproduction, family planning, and HIV/AIDS among unmarried female adolescents in low-performing areas of Bangladesh?	Unmarried female adolescents aged 12–19 in two low-performing sub-districts of Bangladesh	12-19 years	Unmarried	Female	Urban, Rural	rural Sub-district Nabiganj (population 323,357) and an urban slum in Dhaka city (population 141,912)	Informal settlement/slum	Repeated cross-sectional	Weak	Quantitative	Interviewer-administered survey	Yes	No	3265	3265	Urban slums dhaka baseline 800 endline 808; rural nabiganj baseline 833 endline 824	N/A	Descriptive statistics, chi-square test	N/A	Peer educators provided adolescent reproductive health information through structured group sessions	Designed for unmarried adolescent girls in rural Bangladesh; culturally adapted peer-led approach	group education, community shows	Peer educators trained by project staff	Not reported	Community	Social behavior change	Small-group education, Social norms & networks	Knowledge	Knew about FP methods	Binary	Baseline and endline	Individual	% change (pre vs. post)	Urban slums dhaka baseline to endline	N/A	N/A	0.01	Not reported	Not reported	Null (p>.1)	Null	N/A	N/A	N/A
Kabir et al. (2015)	Female unmarried adolescents' knowledge on selected reproductive health issues in two low performing areas of Bangladesh: an evaluation study	2015	BMC Public Health	Bangladesh	Does a peer-led intervention improve knowledge on menstruation, reproduction, family planning, and HIV/AIDS among unmarried female adolescents in low-performing areas of Bangladesh?	Unmarried female adolescents aged 12–19 in two low-performing sub-districts of Bangladesh	12-19 years	Unmarried	Female	Urban, Rural	rural Sub-district Nabiganj (population 323,357) and an urban slum in Dhaka city (population 141,912)	Informal settlement/slum	Repeated cross-sectional	Weak	Quantitative	Interviewer-administered survey	Yes	No	3265	3265	Urban slums dhaka baseline 800 endline 808; rural nabiganj baseline 833 endline 825	N/A	Descriptive statistics, chi-square test	N/A	Peer educators provided adolescent reproductive health information through structured group sessions	Designed for unmarried adolescent girls in rural Bangladesh; culturally adapted peer-led approach	group education, community shows	Peer educators trained by project staff	Not reported	Community	Social behavior change	Small-group education, Social norms & networks	Knowledge	Knew about FP methods	Binary	Baseline and endline	Individual	% change (pre vs. post)	Rural Nabigangi baseline to endline	N/A	N/A	-3%	Not reported	Not reported	Null (p>.1)	Null	N/A	N/A	N/A
Klinger and Asgary (2016)	Implementation and evaluation of a curriculum to teach reproductive health to adolescents in northern Madagascar	2016	International Health	Madagascar	Does a reproductive health curriculum improve knowledge and attitudes among adolescents in northern Madagascar?	Secondary school students aged 15–19 years in northern Madagascar	15-19 years	Not reported	Male / Female	Peri-urban, Rural	Northern Madagascar	School	Pre/post without comparison group	Weak	Quantitative	Self-administered survey	Yes	No	28	28	N/A	0.82	Paired t-tests for mean score comparisons	N/A	A 9-lesson curriculum covering reproductive anatomy, contraception, pregnancy prevention, STIs, and HIV/AIDS	Locally adapted curriculum based on needs assessment and national guidelines	In-person classroom sessions	Trained teachers and CHWs	Nine weekly 45-minute sessions	Secondary schools	Social behavior change	School-based education, Extension worker	Attitudes	Attitudes regarding contraception	Continuous	Baseline and endline	Individual	Mean diff (pre vs. post)	Pre to post intervention	N/A	N/A	0.03	Not reported	Not reported	Null (p>.1)	Null	N/A	N/A	N/A
Klinger and Asgary (2016)	Implementation and evaluation of a curriculum to teach reproductive health to adolescents in northern Madagascar	2016	International Health	Madagascar	Does a reproductive health curriculum improve knowledge and attitudes among adolescents in northern Madagascar?	Secondary school students aged 15–19 years in northern Madagascar	15-19 years	Not reported	Male / Female	Peri-urban, Rural	Northern Madagascar	School	Pre/post without comparison group	Weak	Quantitative	Self-administered survey	Yes	No	28	28	N/A	0.82	Paired t-tests for mean score comparisons	N/A	A 9-lesson curriculum covering reproductive anatomy, contraception, pregnancy prevention, STIs, and HIV/AIDS	Locally adapted curriculum based on needs assessment and national guidelines	In-person classroom sessions	Trained teachers and CHWs	Nine weekly 45-minute sessions	Secondary schools	Social behavior change	School-based education, Extension worker	Self-efficacy	Self-efficacy regarding contraception	Continuous	Baseline and endline	Individual	Mean diff (pre vs. post)	Pre to post intervention	N/A	N/A	0.63	Not reported	Not reported	Null (p>.1)	Null	N/A	N/A	N/A
Klinger and Asgary (2016)	Implementation and evaluation of a curriculum to teach reproductive health to adolescents in northern Madagascar	2016	International Health	Madagascar	Does a reproductive health curriculum improve knowledge and attitudes among adolescents in northern Madagascar?	Secondary school students aged 15–19 years in northern Madagascar	15-19 years	Not reported	Male / Female	Peri-urban, Rural	Northern Madagascar	School	Pre/post without comparison group	Weak	Quantitative	Self-administered survey	Yes	No	28	28	N/A	0.82	Paired t-tests for mean score comparisons	N/A	A 9-lesson curriculum covering reproductive anatomy, contraception, pregnancy prevention, STIs, and HIV/AIDS	Locally adapted curriculum based on needs assessment and national guidelines	In-person classroom sessions	Trained teachers and CHWs	Nine weekly 45-minute sessions	Secondary schools	Social behavior change	School-based education, Extension worker	Knowledge	Knowledge of HIV/AIDS, STIs, pregnancy	Continuous	Baseline and endline	Individual	Mean diff (pre vs. post)	Pre to post intervention	N/A	N/A	0.16	Not reported	<.001	Significant (p<.05)	Positive	N/A	N/A	N/A
Oberth et al. (2021)	Effectiveness of the Sista2Sista programme in improving HIV and other sexual and reproductive health outcomes among vulnerable adolescent girls and young women in Zimbabwe	2021	African Journal of AIDS Research	Zimbabwe	Does participation in the Sista2Sista programme improve HIV and SRH outcomes among adolescent girls and young women in Zimbabwe?	Vulnerable adolescent girls and young women (AGYW), aged 10–24	10-24 years	Marority unmarried	Female	Urban, Peri-urban, Rural	districts (Bulawayo, Chipinge, Gweru, Makoni, Mazowe, Mutare)	General population	Retrospective observational program evaluation	Very weak	Quantitative	Program records	No	No	91612	91612	N/A	N/A	Chi-square tests, logistic regression, bivariate and multivariate models	Sista2Sista (S2S) Programme	Structured group-based mentoring programme delivering HIV and SRH education, psychosocial support, and life skills to vulnerable AGYW	Designed by MOH, UNFPA, and partners	Group-based sessions	Trained adult female mentors (“Sisters”)	12 weekly sessions	Community-based safe spaces	Social behavior change	Small-group education	Contraceptive uptake/use	Reported use of a family planning method	Binary	N/A	Individual	OR / AOR	participants completed all 40 group exercises vs. those that did not complete all 40 group exercises	N/A	N/A	1.38	1.21-1.56	<.001	Significant (p<.05)	Positive	N/A	N/A	N/A
Oberth et al. (2021)	Effectiveness of the Sista2Sista programme in improving HIV and other sexual and reproductive health outcomes among vulnerable adolescent girls and young women in Zimbabwe	2021	African Journal of AIDS Research	Zimbabwe	Does participation in the Sista2Sista programme improve HIV and SRH outcomes among adolescent girls and young women in Zimbabwe?	Vulnerable adolescent girls and young women (AGYW), aged 10–25	10-24 years	Marority unmarried	Female	Urban, Peri-urban, Rural	districts (Bulawayo, Chipinge, Gweru, Makoni, Mazowe, Mutare)	General population	Retrospective observational program evaluation	Very weak	Quantitative	Program records	No	No	91612	91612	N/A	N/A	Chi-square tests, logistic regression, bivariate and multivariate models	Sista2Sista (S2S) Programme	Structured group-based mentoring programme delivering HIV and SRH education, psychosocial support, and life skills to vulnerable AGYW	Designed by MOH, UNFPA, and partners	Group-based sessions	Trained adult female mentors (“Sisters”)	13 weekly sessions	Community-based safe spaces	Social behavior change	Small-group education	Contraceptive uptake/use	Reported use of a family planning method	Binary	N/A	Individual	OR / AOR	participants completed at least 35 group exercises (88%) vs. those that did not	N/A	N/A	1.06	0.97–1.15	Not reported	Null (p>.1)	Null	N/A	N/A	N/A
Oberth et al. (2021)	Effectiveness of the Sista2Sista programme in improving HIV and other sexual and reproductive health outcomes among vulnerable adolescent girls and young women in Zimbabwe	2021	African Journal of AIDS Research	Zimbabwe	Does participation in the Sista2Sista programme improve HIV and SRH outcomes among adolescent girls and young women in Zimbabwe?	Vulnerable adolescent girls and young women (AGYW), aged 10–26	10-24 years	Marority unmarried	Female	Urban, Peri-urban, Rural	districts (Bulawayo, Chipinge, Gweru, Makoni, Mazowe, Mutare)	General population	Retrospective observational program evaluation	Very weak	Quantitative	Program records	No	No	91612	91612	N/A	N/A	Chi-square tests, logistic regression, bivariate and multivariate models	Sista2Sista (S2S) Programme	Structured group-based mentoring programme delivering HIV and SRH education, psychosocial support, and life skills to vulnerable AGYW	Designed by MOH, UNFPA, and partners	Group-based sessions	Trained adult female mentors (“Sisters”)	14 weekly sessions	Community-based safe spaces	Social behavior change	Small-group education	Contraceptive uptake/use	Reported use of a family planning method	Binary	N/A	Individual	OR / AOR	participants completed at least 30 group exercises (70%) vs. those that did not	N/A	N/A	0.95	0.87–1.04	Not reported	Null (p>.1)	Null	N/A	N/A	N/A
Thakuri et al. (2023)	Effect of Healthy Transitions intervention in improving family planning uptake among adolescents and young women in Western Nepal: A pre-and post-intervention study	2023	PLOS ONE	Nepal	Does the Healthy Transitions intervention improve family planning knowledge, attitudes, and practices among adolescent girls and young women in Western Nepal?	Adolescent girls and young women (AGYW) aged 15–24 years who were married or in union	15-24 years	Mixed	Female	Rural	Karnali Province	General population	Pre/post without comparison group	Weak	Quantitative	Interviewer-administered survey	Yes	No	786	786	N/A	0.28	Descriptive statistics, t-tests, chi-square tests	Healthy Transitions	A multi-level intervention including mentor-led curriculum-based small group sessions on SRHR and life skills and challenging harmful gender norms, home visits with male partners and families, community-based games about SRH and dialogues and social events, health system capacity building	Locally adapted intervention model based on formative research and stakeholder engagement	In-person group education, home visits	Trained facilitators and health providers	implemented over 18 months	Community (home and group sessions)	Social behavior change, Supply & service delivery	Small-group education, Social norms & networks, Engaging men and boys, Other	Contraceptive uptake/use	Use of any contraceptive method	Binary	Baseline and endline	Individual	% change (pre vs. post)	Pre to post intervention	N/A	N/A	0.09	Not reported	<.001	Significant (p<.05)	Positive	N/A	N/A	N/A
Thakuri et al. (2023)	Effect of Healthy Transitions intervention in improving family planning uptake among adolescents and young women in Western Nepal: A pre-and post-intervention study	2023	PLOS ONE	Nepal	Does the Healthy Transitions intervention improve family planning knowledge, attitudes, and practices among adolescent girls and young women in Western Nepal?	Adolescent girls and young women (AGYW) aged 15–24 years who were married or in union	15-24 years	Mixed	Female	Rural	Karnali Province	General population	Pre/post without comparison group	Weak	Quantitative	Interviewer-administered survey	Yes	No	786	786	N/A	0.28	Descriptive statistics, t-tests, chi-square tests	Healthy Transitions	A multi-level intervention including mentor-led curriculum-based small group sessions on SRHR and life skills and challenging harmful gender norms, home visits with male partners and families, community-based games about SRH and dialogues and social events, health system capacity building	Locally adapted intervention model based on formative research and stakeholder engagement	In-person group education, home visits	Trained facilitators and health providers	implemented over 18 months	Community (home and group sessions)	Social behavior change, Supply & service delivery	Small-group education, Social norms & networks, Engaging men and boys, Other	Contraceptive uptake/use	Use of any modern method	Binary	Baseline and endline	Individual	% change (pre vs. post)	Pre to post intervention	N/A	N/A	0.07	Not reported	<.001	Significant (p<.05)	Positive	N/A	N/A	N/A
Thakuri et al. (2023)	Effect of Healthy Transitions intervention in improving family planning uptake among adolescents and young women in Western Nepal: A pre-and post-intervention study	2023	PLOS ONE	Nepal	Does the Healthy Transitions intervention improve family planning knowledge, attitudes, and practices among adolescent girls and young women in Western Nepal?	Adolescent girls and young women (AGYW) aged 15–24 years who were married or in union	15-24 years	Mixed	Female	Rural	Karnali Province	General population	Pre/post without comparison group	Weak	Quantitative	Interviewer-administered survey	Yes	No	786	786	N/A	0.28	Descriptive statistics, t-tests, chi-square tests	Healthy Transitions	A multi-level intervention including mentor-led curriculum-based small group sessions on SRHR and life skills and challenging harmful gender norms, home visits with male partners and families, community-based games about SRH and dialogues and social events, health system capacity building	Locally adapted intervention model based on formative research and stakeholder engagement	In-person group education, home visits	Trained facilitators and health providers	implemented over 18 months	Community (home and group sessions)	Social behavior change, Supply & service delivery	Small-group education, Social norms & networks, Engaging men and boys, Other	Knowledge	Knows where to obtain FP	Binary	Baseline and endline	Individual	% change (pre vs. post)	Pre to post intervention	N/A	N/A	0.07	Not reported	<.001	Significant (p<.05)	Positive	N/A	N/A	N/A
Thakuri et al. (2023)	Effect of Healthy Transitions intervention in improving family planning uptake among adolescents and young women in Western Nepal: A pre-and post-intervention study	2023	PLOS ONE	Nepal	Does the Healthy Transitions intervention improve family planning knowledge, attitudes, and practices among adolescent girls and young women in Western Nepal?	Adolescent girls and young women (AGYW) aged 15–24 years who were married or in union	15-24 years	Mixed	Female	Rural	Karnali Province	General population	Pre/post without comparison group	Weak	Quantitative	Interviewer-administered survey	Yes	No	786	786	N/A	0.28	Descriptive statistics, t-tests, chi-square tests	Healthy Transitions	A multi-level intervention including mentor-led curriculum-based small group sessions on SRHR and life skills and challenging harmful gender norms, home visits with male partners and families, community-based games about SRH and dialogues and social events, health system capacity building	Locally adapted intervention model based on formative research and stakeholder engagement	In-person group education, home visits	Trained facilitators and health providers	implemented over 18 months	Community (home and group sessions)	Social behavior change, Supply & service delivery	Small-group education, Social norms & networks, Engaging men and boys, Other	Knowledge	Knows a woman can get pregnant before menstrual period returns	Binary	Baseline and endline	Individual	% change (pre vs. post)	Pre to post intervention	N/A	N/A	0.24	Not reported	0.93	Null (p>.1)	Null	N/A	N/A	N/A
Thakuri et al. (2023)	Effect of Healthy Transitions intervention in improving family planning uptake among adolescents and young women in Western Nepal: A pre-and post-intervention study	2023	PLOS ONE	Nepal	Does the Healthy Transitions intervention improve family planning knowledge, attitudes, and practices among adolescent girls and young women in Western Nepal?	Adolescent girls and young women (AGYW) aged 15–24 years who were married or in union	15-24 years	Mixed	Female	Rural	Karnali Province	General population	Pre/post without comparison group	Weak	Quantitative	Interviewer-administered survey	Yes	No	786	786	N/A	0.28	Descriptive statistics, t-tests, chi-square tests	Healthy Transitions	A multi-level intervention including mentor-led curriculum-based small group sessions on SRHR and life skills and challenging harmful gender norms, home visits with male partners and families, community-based games about SRH and dialogues and social events, health system capacity building	Locally adapted intervention model based on formative research and stakeholder engagement	In-person group education, home visits	Trained facilitators and health providers	implemented over 18 months	Community (home and group sessions)	Social behavior change, Supply & service delivery	Small-group education, Social norms & networks, Engaging men and boys, Other	Knowledge	Knows about the fertile period	Binary	Baseline and endline	Individual	% change (pre vs. post)	Pre to post intervention	N/A	N/A	0.3	Not reported	0.72	Null (p>.1)	Null	N/A	N/A	N/A
Geugten et al. (2015)	Evaluation of a Sexual and Reproductive Health Education Programme: Students' Knowledge, Attitude and Behaviour in Bolgatanga Municipality, Northern Ghana	2015	African Journal of Reproductive Health	Ghana	Does a school-based SRH education program improve knowledge, attitudes, and behaviors related to sexual and reproductive health among secondary school students in Bolgatanga Municipality, Ghana?	Junior high school students in 6 public schools in Bolgatanga Municipality	12-20 years	Not reported	Male / Female	Urban	Bolgatanga Municipality, Northern Ghana	School	Pre/post without comparison group	Weak	Quantitative	Interviewer-administered survey	Yes	No	312	312	312 pre/ 272 post	0.13	Descriptive statistics, t-tests, chi-square tests	N/A	Sexual and reproductive health education sessions integrated into school curriculum with trained facilitators delivering 1-hour sessions once a week for 5 weeks	Adapted to local context; culturally appropriate	In-person, group sessions	Trained facilitators/teachers	5 sessions (1 per week)	Junior high and high school classrooms	Social behavior change	School-based education	Knowledge	SRH knowledge score	Continuous	Baseline and endline	Individual	Mean diff (pre vs. post)	Pre to post intervention	N/A	N/A	1.17	Not reported	<.05	Significant (p<.05)	Positive	N/A	N/A	N/A
Geugten et al. (2015)	Evaluation of a Sexual and Reproductive Health Education Programme: Students' Knowledge, Attitude and Behaviour in Bolgatanga Municipality, Northern Ghana	2015	African Journal of Reproductive Health	Ghana	Does a school-based SRH education program improve knowledge, attitudes, and behaviors related to sexual and reproductive health among secondary school students in Bolgatanga Municipality, Ghana?	Junior high school students in 6 public schools in Bolgatanga Municipality	12-20 years	Not reported	Male / Female	Urban	Bolgatanga Municipality, Northern Ghana	School	Pre/post without comparison group	Weak	Quantitative	Interviewer-administered survey	Yes	No	312	312	313 pre/ 272 post	0.13	Descriptive statistics, t-tests, chi-square tests	N/A	Sexual and reproductive health education sessions integrated into school curriculum with trained facilitators delivering 1-hour sessions once a week for 5 weeks	Adapted to local context; culturally appropriate	In-person, group sessions	Trained facilitators/teachers	5 sessions (1 per week)	Junior high and high school classrooms	Social behavior change	School-based education	Intention/desire/demand	SRH behavioral intention	Continuous	Baseline and endline	Individual	Mean diff (pre vs. post)	Pre to post intervention	N/A	N/A	0.41	Not reported	Not reported	Null (p>.1)	Null	N/A	N/A	N/A
Austrian et al. (2021)	Impacts of two-year multisectoral cash plus programs on young adolescent girls’ education, health and economic outcomes: Adolescent Girls Initiative-Kenya (AGI-K) randomized trial	2021	BMC Public Health	Kenya	What is the impact of multisectoral “cash plus” interventions—cash alone, and cash plus education, health, and wealth creation interventions—on adolescent girls’ outcomes across four domains in two distinct settings in Kenya?	Young adolescent girls aged 11–14 in two sites (urban Kibera and rural Wajir), not enrolled in boarding school	11-14 years	Unmarried	Female	Urban, Rural	Nairobi (Kibera) and Wajir (northeastern Kenya)	General population	Cluster randomized controlled trial (RCT)	Strong	Quantitative	Household surveys with girls and caregivers	Yes	Yes	4537	4537	Kibera V 597, VE 592, VEH 609, VEHW 592; Wajir V 506, VE 549, VEH 538, VEHW 554	0.1	Intent-to-treat analysis, logistic regression, difference-in-differences (DiD), adjusted for clustering and covariates	Adolescent Girls Initiative - Kenya (AGI-K)	Four-arm intervention including violence prevention only, violence prevention plus education, violence prevention plus education and health, and violence prevention plus education plus health plus wealth creation. Violence prevention included community conversations and contracts and implementation of action plans. Education included conditional cash and in-kind transfers to the head of household…	Designed for age and contextual needs; implemented in two distinct settings	Community-based sessions, schooling subsidies, household cash transfers	Save the Children (Wajir), Population Council (Kibera), in collaboration with government and NGOs	2 years (2015–2017); frequency varies by component (e.g., regular health sessions, monthly cash transfers)	Community and household	Social behavior change, Enhancement	Financial incentives, Empowerment components, Small-group education	Knowledge	Knows method of modern contraception	Binary	Baseline and endline, controlled for baseline in model	Individual	RD / APD	Assigned to violence plus education vs. violence prevention only (Kibera)	N/A	N/A	-.0007	− 0.06, 0.05	Not reported	Null (p>.1)	Null	N/A	N/A	N/A
Austrian et al. (2021)	Impacts of two-year multisectoral cash plus programs on young adolescent girls’ education, health and economic outcomes: Adolescent Girls Initiative-Kenya (AGI-K) randomized trial	2021	BMC Public Health	Kenya	What is the impact of multisectoral “cash plus” interventions—cash alone, and cash plus education, health, and wealth creation interventions—on adolescent girls’ outcomes across four domains in two distinct settings in Kenya?	Young adolescent girls aged 11–14 in two sites (urban Kibera and rural Wajir), not enrolled in boarding school	11-14 years	Unmarried	Female	Urban, Rural	Nairobi (Kibera) and Wajir (northeastern Kenya)	General population	Cluster randomized controlled trial (RCT)	Strong	Quantitative	Household surveys with girls and caregivers	Yes	Yes	4537	4537	Kibera V 597, VE 592, VEH 609, VEHW 592; Wajir V 506, VE 549, VEH 538, VEHW 555	0.1	Intent-to-treat analysis, logistic regression, difference-in-differences (DiD), adjusted for clustering and covariates	Adolescent Girls Initiative - Kenya (AGI-K)	Four-arm intervention including violence prevention only, violence prevention plus education, violence prevention plus education and health, and violence prevention plus education plus health plus wealth creation. Violence prevention included community conversations and contracts and implementation of action plans. Education included conditional cash and in-kind transfers to the head of household…	Designed for age and contextual needs; implemented in two distinct settings	Community-based sessions, schooling subsidies, household cash transfers	Save the Children (Wajir), Population Council (Kibera), in collaboration with government and NGOs	2 years (2015–2017); frequency varies by component (e.g., regular health sessions, monthly cash transfers)	Community and household	Social behavior change, Enhancement	Financial incentives, Empowerment components, Small-group education	Knowledge	Knows method of modern contraception	Binary	Baseline and endline, controlled for baseline in model	Individual	RD / APD	Assigned to violence plus education plus health vs. violence prevention only (Kibera)	N/A	N/A	0.13	0.07, 0.19	<.001	Significant (p<.05)	Positive	N/A	N/A	N/A
Austrian et al. (2021)	Impacts of two-year multisectoral cash plus programs on young adolescent girls’ education, health and economic outcomes: Adolescent Girls Initiative-Kenya (AGI-K) randomized trial	2021	BMC Public Health	Kenya	What is the impact of multisectoral “cash plus” interventions—cash alone, and cash plus education, health, and wealth creation interventions—on adolescent girls’ outcomes across four domains in two distinct settings in Kenya?	Young adolescent girls aged 11–14 in two sites (urban Kibera and rural Wajir), not enrolled in boarding school	11-14 years	Unmarried	Female	Urban, Rural	Nairobi (Kibera) and Wajir (northeastern Kenya)	General population	Cluster randomized controlled trial (RCT)	Strong	Quantitative	Household surveys with girls and caregivers	Yes	Yes	4537	4537	Kibera V 597, VE 592, VEH 609, VEHW 592; Wajir V 506, VE 549, VEH 538, VEHW 556	0.1	Intent-to-treat analysis, logistic regression, difference-in-differences (DiD), adjusted for clustering and covariates	Adolescent Girls Initiative - Kenya (AGI-K)	Four-arm intervention including violence prevention only, violence prevention plus education, violence prevention plus education and health, and violence prevention plus education plus health plus wealth creation. Violence prevention included community conversations and contracts and implementation of action plans. Education included conditional cash and in-kind transfers to the head of household…	Designed for age and contextual needs; implemented in two distinct settings	Community-based sessions, schooling subsidies, household cash transfers	Save the Children (Wajir), Population Council (Kibera), in collaboration with government and NGOs	2 years (2015–2017); frequency varies by component (e.g., regular health sessions, monthly cash transfers)	Community and household	Social behavior change, Enhancement	Financial incentives, Empowerment components, Small-group education	Knowledge	Knows method of modern contraception	Binary	Baseline and endline, controlled for baseline in model	Individual	RD / APD	Assigned to violence plus education plus health plus wealth vs. violence prevention only (Kibera)	N/A	N/A	0.12	0.06, 0.18	<.001	Significant (p<.05)	Positive	N/A	N/A	N/A
Austrian et al. (2021)	Impacts of two-year multisectoral cash plus programs on young adolescent girls’ education, health and economic outcomes: Adolescent Girls Initiative-Kenya (AGI-K) randomized trial	2021	BMC Public Health	Kenya	What is the impact of multisectoral “cash plus” interventions—cash alone, and cash plus education, health, and wealth creation interventions—on adolescent girls’ outcomes across four domains in two distinct settings in Kenya?	Young adolescent girls aged 11–14 in two sites (urban Kibera and rural Wajir), not enrolled in boarding school	11-14 years	Unmarried	Female	Urban, Rural	Nairobi (Kibera) and Wajir (northeastern Kenya)	General population	Cluster randomized controlled trial (RCT)	Strong	Quantitative	Household surveys with girls and caregivers	Yes	Yes	4537	4537	Kibera V 597, VE 592, VEH 609, VEHW 592; Wajir V 506, VE 549, VEH 538, VEHW 557	0.1	Intent-to-treat analysis, logistic regression, difference-in-differences (DiD), adjusted for clustering and covariates	Adolescent Girls Initiative - Kenya (AGI-K)	Four-arm intervention including violence prevention only, violence prevention plus education, violence prevention plus education and health, and violence prevention plus education plus health plus wealth creation. Violence prevention included community conversations and contracts and implementation of action plans. Education included conditional cash and in-kind transfers to the head of household…	Designed for age and contextual needs; implemented in two distinct settings	Community-based sessions, schooling subsidies, household cash transfers	Save the Children (Wajir), Population Council (Kibera), in collaboration with government and NGOs	2 years (2015–2017); frequency varies by component (e.g., regular health sessions, monthly cash transfers)	Community and household	Social behavior change, Enhancement	Financial incentives, Empowerment components, Small-group education	Knowledge	SRH knowledge score	Continuous	Baseline and endline, controlled for baseline in model	Individual	Beta	Assigned to violence plus education vs. violence prevention only (Kibera)	N/A	N/A	0.02	−0.11, 0.14	Not reported	Null (p>.1)	Null	N/A	N/A	N/A
Austrian et al. (2021)	Impacts of two-year multisectoral cash plus programs on young adolescent girls’ education, health and economic outcomes: Adolescent Girls Initiative-Kenya (AGI-K) randomized trial	2021	BMC Public Health	Kenya	What is the impact of multisectoral “cash plus” interventions—cash alone, and cash plus education, health, and wealth creation interventions—on adolescent girls’ outcomes across four domains in two distinct settings in Kenya?	Young adolescent girls aged 11–14 in two sites (urban Kibera and rural Wajir), not enrolled in boarding school	11-14 years	Unmarried	Female	Urban, Rural	Nairobi (Kibera) and Wajir (northeastern Kenya)	General population	Cluster randomized controlled trial (RCT)	Strong	Quantitative	Household surveys with girls and caregivers	Yes	Yes	4537	4537	Kibera V 597, VE 592, VEH 609, VEHW 592; Wajir V 506, VE 549, VEH 538, VEHW 558	0.1	Intent-to-treat analysis, logistic regression, difference-in-differences (DiD), adjusted for clustering and covariates	Adolescent Girls Initiative - Kenya (AGI-K)	Four-arm intervention including violence prevention only, violence prevention plus education, violence prevention plus education and health, and violence prevention plus education plus health plus wealth creation. Violence prevention included community conversations and contracts and implementation of action plans. Education included conditional cash and in-kind transfers to the head of household…	Designed for age and contextual needs; implemented in two distinct settings	Community-based sessions, schooling subsidies, household cash transfers	Save the Children (Wajir), Population Council (Kibera), in collaboration with government and NGOs	2 years (2015–2017); frequency varies by component (e.g., regular health sessions, monthly cash transfers)	Community and household	Social behavior change, Enhancement	Financial incentives, Empowerment components, Small-group education	Knowledge	SRH knowledge score	Continuous	Baseline and endline, controlled for baseline in model	Individual	Beta	Assigned to violence plus education plus health vs. violence prevention only (Kibera)	N/A	N/A	0.21	0.09, 0.34	<.01	Significant (p<.05)	Positive	N/A	N/A	N/A
Austrian et al. (2021)	Impacts of two-year multisectoral cash plus programs on young adolescent girls’ education, health and economic outcomes: Adolescent Girls Initiative-Kenya (AGI-K) randomized trial	2021	BMC Public Health	Kenya	What is the impact of multisectoral “cash plus” interventions—cash alone, and cash plus education, health, and wealth creation interventions—on adolescent girls’ outcomes across four domains in two distinct settings in Kenya?	Young adolescent girls aged 11–14 in two sites (urban Kibera and rural Wajir), not enrolled in boarding school	11-14 years	Unmarried	Female	Urban, Rural	Nairobi (Kibera) and Wajir (northeastern Kenya)	General population	Cluster randomized controlled trial (RCT)	Strong	Quantitative	Household surveys with girls and caregivers	Yes	Yes	4537	4537	Kibera V 597, VE 592, VEH 609, VEHW 592; Wajir V 506, VE 549, VEH 538, VEHW 559	0.1	Intent-to-treat analysis, logistic regression, difference-in-differences (DiD), adjusted for clustering and covariates	Adolescent Girls Initiative - Kenya (AGI-K)	Four-arm intervention including violence prevention only, violence prevention plus education, violence prevention plus education and health, and violence prevention plus education plus health plus wealth creation. Violence prevention included community conversations and contracts and implementation of action plans. Education included conditional cash and in-kind transfers to the head of household…	Designed for age and contextual needs; implemented in two distinct settings	Community-based sessions, schooling subsidies, household cash transfers	Save the Children (Wajir), Population Council (Kibera), in collaboration with government and NGOs	2 years (2015–2017); frequency varies by component (e.g., regular health sessions, monthly cash transfers)	Community and household	Social behavior change, Enhancement	Financial incentives, Empowerment components, Small-group education	Knowledge	SRH knowledge score	Continuous	Baseline and endline, controlled for baseline in model	Individual	Beta	Assigned to violence plus education plus health plus wealth vs. violence prevention only (Kibera)	N/A	N/A	0.16	0.03, 0.29	<.05	Significant (p<.05)	Positive	N/A	N/A	N/A
Austrian et al. (2021)	Impacts of two-year multisectoral cash plus programs on young adolescent girls’ education, health and economic outcomes: Adolescent Girls Initiative-Kenya (AGI-K) randomized trial	2021	BMC Public Health	Kenya	What is the impact of multisectoral “cash plus” interventions—cash alone, and cash plus education, health, and wealth creation interventions—on adolescent girls’ outcomes across four domains in two distinct settings in Kenya?	Young adolescent girls aged 11–14 in two sites (urban Kibera and rural Wajir), not enrolled in boarding school	11-14 years	Unmarried	Female	Urban, Rural	Nairobi (Kibera) and Wajir (northeastern Kenya)	General population	Cluster randomized controlled trial (RCT)	Strong	Quantitative	Household surveys with girls and caregivers	Yes	Yes	4537	4537	Kibera V 597, VE 592, VEH 609, VEHW 592; Wajir V 506, VE 549, VEH 538, VEHW 560	0.1	Intent-to-treat analysis, logistic regression, difference-in-differences (DiD), adjusted for clustering and covariates	Adolescent Girls Initiative - Kenya (AGI-K)	Four-arm intervention including violence prevention only, violence prevention plus education, violence prevention plus education and health, and violence prevention plus education plus health plus wealth creation. Violence prevention included community conversations and contracts and implementation of action plans. Education included conditional cash and in-kind transfers to the head of household…	Designed for age and contextual needs; implemented in two distinct settings	Community-based sessions, schooling subsidies, household cash transfers	Save the Children (Wajir), Population Council (Kibera), in collaboration with government and NGOs	2 years (2015–2017); frequency varies by component (e.g., regular health sessions, monthly cash transfers)	Community and household	Social behavior change, Enhancement	Financial incentives, Empowerment components, Small-group education	Self-efficacy	Condom self-efficacy	Continuous	Baseline and endline, controlled for baseline in model	Individual	Beta	Assigned to violence plus education vs. violence prevention only (Kibera)	N/A	N/A	0.04	−0.10, 0.17	Not reported	Null (p>.1)	Null	N/A	N/A	N/A
Austrian et al. (2021)	Impacts of two-year multisectoral cash plus programs on young adolescent girls’ education, health and economic outcomes: Adolescent Girls Initiative-Kenya (AGI-K) randomized trial	2021	BMC Public Health	Kenya	What is the impact of multisectoral “cash plus” interventions—cash alone, and cash plus education, health, and wealth creation interventions—on adolescent girls’ outcomes across four domains in two distinct settings in Kenya?	Young adolescent girls aged 11–14 in two sites (urban Kibera and rural Wajir), not enrolled in boarding school	11-14 years	Unmarried	Female	Urban, Rural	Nairobi (Kibera) and Wajir (northeastern Kenya)	General population	Cluster randomized controlled trial (RCT)	Strong	Quantitative	Household surveys with girls and caregivers	Yes	Yes	4537	4537	Kibera V 597, VE 592, VEH 609, VEHW 592; Wajir V 506, VE 549, VEH 538, VEHW 561	0.1	Intent-to-treat analysis, logistic regression, difference-in-differences (DiD), adjusted for clustering and covariates	Adolescent Girls Initiative - Kenya (AGI-K)	Four-arm intervention including violence prevention only, violence prevention plus education, violence prevention plus education and health, and violence prevention plus education plus health plus wealth creation. Violence prevention included community conversations and contracts and implementation of action plans. Education included conditional cash and in-kind transfers to the head of household…	Designed for age and contextual needs; implemented in two distinct settings	Community-based sessions, schooling subsidies, household cash transfers	Save the Children (Wajir), Population Council (Kibera), in collaboration with government and NGOs	2 years (2015–2017); frequency varies by component (e.g., regular health sessions, monthly cash transfers)	Community and household	Social behavior change, Enhancement	Financial incentives, Empowerment components, Small-group education	Self-efficacy	Condom self-efficacy	Continuous	Baseline and endline, controlled for baseline in model	Individual	Beta	Assigned to violence plus education plus health vs. violence prevention only (Kibera)	N/A	N/A	0.18	0.05, 0.30	<.01	Significant (p<.05)	Positive	N/A	N/A	N/A
Austrian et al. (2021)	Impacts of two-year multisectoral cash plus programs on young adolescent girls’ education, health and economic outcomes: Adolescent Girls Initiative-Kenya (AGI-K) randomized trial	2021	BMC Public Health	Kenya	What is the impact of multisectoral “cash plus” interventions—cash alone, and cash plus education, health, and wealth creation interventions—on adolescent girls’ outcomes across four domains in two distinct settings in Kenya?	Young adolescent girls aged 11–14 in two sites (urban Kibera and rural Wajir), not enrolled in boarding school	11-14 years	Unmarried	Female	Urban, Rural	Nairobi (Kibera) and Wajir (northeastern Kenya)	General population	Cluster randomized controlled trial (RCT)	Strong	Quantitative	Household surveys with girls and caregivers	Yes	Yes	4537	4537	Kibera V 597, VE 592, VEH 609, VEHW 592; Wajir V 506, VE 549, VEH 538, VEHW 562	0.1	Intent-to-treat analysis, logistic regression, difference-in-differences (DiD), adjusted for clustering and covariates	Adolescent Girls Initiative - Kenya (AGI-K)	Four-arm intervention including violence prevention only, violence prevention plus education, violence prevention plus education and health, and violence prevention plus education plus health plus wealth creation. Violence prevention included community conversations and contracts and implementation of action plans. Education included conditional cash and in-kind transfers to the head of household…	Designed for age and contextual needs; implemented in two distinct settings	Community-based sessions, schooling subsidies, household cash transfers	Save the Children (Wajir), Population Council (Kibera), in collaboration with government and NGOs	2 years (2015–2017); frequency varies by component (e.g., regular health sessions, monthly cash transfers)	Community and household	Social behavior change, Enhancement	Financial incentives, Empowerment components, Small-group education	Self-efficacy	Condom self-efficacy	Continuous	Baseline and endline, controlled for baseline in model	Individual	Beta	Assigned to violence plus education plus health plus wealth vs. violence prevention only (Kibera)	N/A	N/A	0.12	−0.01, 0.25	<.1	Marginally significant (p<.1)	Positive	N/A	N/A	N/A
Austrian et al. (2021)	Impacts of two-year multisectoral cash plus programs on young adolescent girls’ education, health and economic outcomes: Adolescent Girls Initiative-Kenya (AGI-K) randomized trial	2021	BMC Public Health	Kenya	What is the impact of multisectoral “cash plus” interventions—cash alone, and cash plus education, health, and wealth creation interventions—on adolescent girls’ outcomes across four domains in two distinct settings in Kenya?	Young adolescent girls aged 11–14 in two sites (urban Kibera and rural Wajir), not enrolled in boarding school	11-14 years	Unmarried	Female	Urban, Rural	Nairobi (Kibera) and Wajir (northeastern Kenya)	General population	Cluster randomized controlled trial (RCT)	Strong	Quantitative	Household surveys with girls and caregivers	Yes	Yes	4537	4537	Kibera V 597, VE 592, VEH 609, VEHW 592; Wajir V 506, VE 549, VEH 538, VEHW 563	0.1	Intent-to-treat analysis, logistic regression, difference-in-differences (DiD), adjusted for clustering and covariates	Adolescent Girls Initiative - Kenya (AGI-K)	Four-arm intervention including violence prevention only, violence prevention plus education, violence prevention plus education and health, and violence prevention plus education plus health plus wealth creation. Violence prevention included community conversations and contracts and implementation of action plans. Education included conditional cash and in-kind transfers to the head of household…	Designed for age and contextual needs; implemented in two distinct settings	Community-based sessions, schooling subsidies, household cash transfers	Save the Children (Wajir), Population Council (Kibera), in collaboration with government and NGOs	2 years (2015–2017); frequency varies by component (e.g., regular health sessions, monthly cash transfers)	Community and household	Social behavior change, Enhancement	Financial incentives, Empowerment components, Small-group education	Knowledge	Knows method of modern contraception	Binary	Baseline and endline, controlled for baseline in model	Individual	RD / APD	Assigned to violence plus education vs. violence prevention only (Wajir)	N/A	N/A	-0.1	−0.21, 0.02	<.1	Marginally significant (p<.1)	Negative	N/A	N/A	N/A
Austrian et al. (2021)	Impacts of two-year multisectoral cash plus programs on young adolescent girls’ education, health and economic outcomes: Adolescent Girls Initiative-Kenya (AGI-K) randomized trial	2021	BMC Public Health	Kenya	What is the impact of multisectoral “cash plus” interventions—cash alone, and cash plus education, health, and wealth creation interventions—on adolescent girls’ outcomes across four domains in two distinct settings in Kenya?	Young adolescent girls aged 11–14 in two sites (urban Kibera and rural Wajir), not enrolled in boarding school	11-14 years	Unmarried	Female	Urban, Rural	Nairobi (Kibera) and Wajir (northeastern Kenya)	General population	Cluster randomized controlled trial (RCT)	Strong	Quantitative	Household surveys with girls and caregivers	Yes	Yes	4537	4537	Kibera V 597, VE 592, VEH 609, VEHW 592; Wajir V 506, VE 549, VEH 538, VEHW 564	0.1	Intent-to-treat analysis, logistic regression, difference-in-differences (DiD), adjusted for clustering and covariates	Adolescent Girls Initiative - Kenya (AGI-K)	Four-arm intervention including violence prevention only, violence prevention plus education, violence prevention plus education and health, and violence prevention plus education plus health plus wealth creation. Violence prevention included community conversations and contracts and implementation of action plans. Education included conditional cash and in-kind transfers to the head of household…	Designed for age and contextual needs; implemented in two distinct settings	Community-based sessions, schooling subsidies, household cash transfers	Save the Children (Wajir), Population Council (Kibera), in collaboration with government and NGOs	2 years (2015–2017); frequency varies by component (e.g., regular health sessions, monthly cash transfers)	Community and household	Social behavior change, Enhancement	Financial incentives, Empowerment components, Small-group education	Knowledge	Knows method of modern contraception	Binary	Baseline and endline, controlled for baseline in model	Individual	RD / APD	Assigned to violence plus education plus health vs. violence prevention only (Wajir)	N/A	N/A	-0.1	−0.19, − 0.01	<.05	Significant (p<.05)	Negative	N/A	N/A	N/A
Austrian et al. (2021)	Impacts of two-year multisectoral cash plus programs on young adolescent girls’ education, health and economic outcomes: Adolescent Girls Initiative-Kenya (AGI-K) randomized trial	2021	BMC Public Health	Kenya	What is the impact of multisectoral “cash plus” interventions—cash alone, and cash plus education, health, and wealth creation interventions—on adolescent girls’ outcomes across four domains in two distinct settings in Kenya?	Young adolescent girls aged 11–14 in two sites (urban Kibera and rural Wajir), not enrolled in boarding school	11-14 years	Unmarried	Female	Urban, Rural	Nairobi (Kibera) and Wajir (northeastern Kenya)	General population	Cluster randomized controlled trial (RCT)	Strong	Quantitative	Household surveys with girls and caregivers	Yes	Yes	4537	4537	Kibera V 597, VE 592, VEH 609, VEHW 592; Wajir V 506, VE 549, VEH 538, VEHW 565	0.1	Intent-to-treat analysis, logistic regression, difference-in-differences (DiD), adjusted for clustering and covariates	Adolescent Girls Initiative - Kenya (AGI-K)	Four-arm intervention including violence prevention only, violence prevention plus education, violence prevention plus education and health, and violence prevention plus education plus health plus wealth creation. Violence prevention included community conversations and contracts and implementation of action plans. Education included conditional cash and in-kind transfers to the head of household…	Designed for age and contextual needs; implemented in two distinct settings	Community-based sessions, schooling subsidies, household cash transfers	Save the Children (Wajir), Population Council (Kibera), in collaboration with government and NGOs	2 years (2015–2017); frequency varies by component (e.g., regular health sessions, monthly cash transfers)	Community and household	Social behavior change, Enhancement	Financial incentives, Empowerment components, Small-group education	Knowledge	Knows method of modern contraception	Binary	Baseline and endline, controlled for baseline in model	Individual	RD / APD	Assigned to violence plus education plus health plus wealth vs. violence prevention only (Wajir)	N/A	N/A	-0.1	−0.20, 0.01	<.1	Marginally significant (p<.1)	Negative	N/A	N/A	N/A
Austrian et al. (2021)	Impacts of two-year multisectoral cash plus programs on young adolescent girls’ education, health and economic outcomes: Adolescent Girls Initiative-Kenya (AGI-K) randomized trial	2021	BMC Public Health	Kenya	What is the impact of multisectoral “cash plus” interventions—cash alone, and cash plus education, health, and wealth creation interventions—on adolescent girls’ outcomes across four domains in two distinct settings in Kenya?	Young adolescent girls aged 11–14 in two sites (urban Kibera and rural Wajir), not enrolled in boarding school	11-14 years	Unmarried	Female	Urban, Rural	Nairobi (Kibera) and Wajir (northeastern Kenya)	General population	Cluster randomized controlled trial (RCT)	Strong	Quantitative	Household surveys with girls and caregivers	Yes	Yes	4537	4537	Kibera V 597, VE 592, VEH 609, VEHW 592; Wajir V 506, VE 549, VEH 538, VEHW 566	0.1	Intent-to-treat analysis, logistic regression, difference-in-differences (DiD), adjusted for clustering and covariates	Adolescent Girls Initiative - Kenya (AGI-K)	Four-arm intervention including violence prevention only, violence prevention plus education, violence prevention plus education and health, and violence prevention plus education plus health plus wealth creation. Violence prevention included community conversations and contracts and implementation of action plans. Education included conditional cash and in-kind transfers to the head of household…	Designed for age and contextual needs; implemented in two distinct settings	Community-based sessions, schooling subsidies, household cash transfers	Save the Children (Wajir), Population Council (Kibera), in collaboration with government and NGOs	2 years (2015–2017); frequency varies by component (e.g., regular health sessions, monthly cash transfers)	Community and household	Social behavior change, Enhancement	Financial incentives, Empowerment components, Small-group education	Knowledge	SRH knowledge score	Continuous	Baseline and endline, controlled for baseline in model	Individual	Beta	Assigned to violence plus education vs. violence prevention only (Wajir)	N/A	N/A	0.34	0.08, 0.60	<.05	Significant (p<.05)	Positive	N/A	N/A	N/A
Austrian et al. (2021)	Impacts of two-year multisectoral cash plus programs on young adolescent girls’ education, health and economic outcomes: Adolescent Girls Initiative-Kenya (AGI-K) randomized trial	2021	BMC Public Health	Kenya	What is the impact of multisectoral “cash plus” interventions—cash alone, and cash plus education, health, and wealth creation interventions—on adolescent girls’ outcomes across four domains in two distinct settings in Kenya?	Young adolescent girls aged 11–14 in two sites (urban Kibera and rural Wajir), not enrolled in boarding school	11-14 years	Unmarried	Female	Urban, Rural	Nairobi (Kibera) and Wajir (northeastern Kenya)	General population	Cluster randomized controlled trial (RCT)	Strong	Quantitative	Household surveys with girls and caregivers	Yes	Yes	4537	4537	Kibera V 597, VE 592, VEH 609, VEHW 592; Wajir V 506, VE 549, VEH 538, VEHW 567	0.1	Intent-to-treat analysis, logistic regression, difference-in-differences (DiD), adjusted for clustering and covariates	Adolescent Girls Initiative - Kenya (AGI-K)	Four-arm intervention including violence prevention only, violence prevention plus education, violence prevention plus education and health, and violence prevention plus education plus health plus wealth creation. Violence prevention included community conversations and contracts and implementation of action plans. Education included conditional cash and in-kind transfers to the head of household…	Designed for age and contextual needs; implemented in two distinct settings	Community-based sessions, schooling subsidies, household cash transfers	Save the Children (Wajir), Population Council (Kibera), in collaboration with government and NGOs	2 years (2015–2017); frequency varies by component (e.g., regular health sessions, monthly cash transfers)	Community and household	Social behavior change, Enhancement	Financial incentives, Empowerment components, Small-group education	Knowledge	SRH knowledge score	Continuous	Baseline and endline, controlled for baseline in model	Individual	Beta	Assigned to violence plus education plus health vs. violence prevention only (Wajir)	N/A	N/A	0.43	0.17, 0.70	<.01	Significant (p<.05)	Positive	N/A	N/A	N/A
Austrian et al. (2021)	Impacts of two-year multisectoral cash plus programs on young adolescent girls’ education, health and economic outcomes: Adolescent Girls Initiative-Kenya (AGI-K) randomized trial	2021	BMC Public Health	Kenya	What is the impact of multisectoral “cash plus” interventions—cash alone, and cash plus education, health, and wealth creation interventions—on adolescent girls’ outcomes across four domains in two distinct settings in Kenya?	Young adolescent girls aged 11–14 in two sites (urban Kibera and rural Wajir), not enrolled in boarding school	11-14 years	Unmarried	Female	Urban, Rural	Nairobi (Kibera) and Wajir (northeastern Kenya)	General population	Cluster randomized controlled trial (RCT)	Strong	Quantitative	Household surveys with girls and caregivers	Yes	Yes	4537	4537	Kibera V 597, VE 592, VEH 609, VEHW 592; Wajir V 506, VE 549, VEH 538, VEHW 568	0.1	Intent-to-treat analysis, logistic regression, difference-in-differences (DiD), adjusted for clustering and covariates	Adolescent Girls Initiative - Kenya (AGI-K)	Four-arm intervention including violence prevention only, violence prevention plus education, violence prevention plus education and health, and violence prevention plus education plus health plus wealth creation. Violence prevention included community conversations and contracts and implementation of action plans. Education included conditional cash and in-kind transfers to the head of household…	Designed for age and contextual needs; implemented in two distinct settings	Community-based sessions, schooling subsidies, household cash transfers	Save the Children (Wajir), Population Council (Kibera), in collaboration with government and NGOs	2 years (2015–2017); frequency varies by component (e.g., regular health sessions, monthly cash transfers)	Community and household	Social behavior change, Enhancement	Financial incentives, Empowerment components, Small-group education	Knowledge	SRH knowledge score	Continuous	Baseline and endline, controlled for baseline in model	Individual	Beta	Assigned to violence plus education plus health plus wealth vs. violence prevention only (Wajir)	N/A	N/A	0.24	−0.03, 0.50	<.1	Marginally significant (p<.1)	Positive	N/A	N/A	N/A
[truncated: 19 more columns]
