# Supplementary material for: What Works to Improve Contraceptive Outcomes Among Adolescents and Young Adults in LMICs: A Rapid Evidence Assessment and Synthesis by Intervention Strategy
Source: Research Square preprint supplement (doi:10.21203/rs.3.rs-8716367/v1), 2026-02-16
Supplement: Supplementary file 2 [file d297aec3933cd4b96c050d46.docx]

**Supplement 1. Database-Specific Search Strategies**

| **Database** | **Search String** |
| --- | --- |
| Pubmed | ((("Adolescent"[Mesh]) OR "Young Adult"[Mesh] OR teenager [tiab] OR adolescent [tiab] OR young adult [tiab]) AND (("Contraception"[Mesh]) OR "Family Planning Services"[Mesh] OR Family planning [tiab] OR Contracept* [tiab])) AND ("Developing Countries"[Mesh] OR low and middle income count*[tiab] OR Nigeria OR Niger OR Senegal OR Ethiopia OR Cote d’Ivoire OR Pakistan) |
| Embase | ('developing country'/exp OR 'low and middle income count*':ti,ab,kw OR nigeria OR niger OR senegal OR ethiopia OR 'cote d ivoire' OR pakistan) AND ('contraception'/exp OR 'family planning'/exp OR ‘Family planning':ti,ab,kw OR Contracept*:ti,ab,kw) AND ('adolescent'/exp OR 'young adult'/exp OR teenager:ti,ab,kw OR adolescent:ti,ab,kw OR ‘young adult’:ti,ab,kw) AND ('article'/it OR 'review'/it) |

**Supplement 2. Mixed Methods Appraisal Tool (MMAT) Scores and Key Methodological Limitations by Study Design**

| **Study ID (Author, Year)** | **MMAT Q1** | **MMAT Q2** | **MMAT Q3** | **MMAT Q4** | **MMAT Q5** | **MMAT % Score** | **Key Limitations** |
| --- | --- | --- | --- | --- | --- | --- | --- |
| ***Quantitative randomized controlled trials*** | *Is randomization appropriately performed?* | *Are the groups comparable at baseline?* | *Are there complete outcome data?* | *Are outcome assessors blinded to the intervention provided?* | *Did the participants adhere to the assigned intervention?* |  |  |
| Alekhya et al. (2023) | Can't tell | Yes | Can't tell | No | Can't tell | 20% | No details provided on randomization procedures, on missing data, on blinding, or on exposure/adherence. No adjustment to any potential confounders. |
| Arinze-Onyia et al. (2014) | Can't tell | No | Yes | No | Can't tell | 20% | Details on randomization procedures are unclear and lacking, no blinding, no information on exposure adherence, no adjustment for confounders, attitudes questions are not clear. |
| Austrian et al. (2021) | Yes | Yes | Yes | Can't tell | Yes | 80% | Self-report bias; some measures were not standardized |
| Bakesiima et al. (2021) | Yes | Yes | No | Yes | Yes | 80% | Single-session intervention; short-term outcome only; 12% attrition; intervention group significantly more prior contraceptive use at baseline and not adjusted for in final analysis |
| Erhardt-Ohren et al. (2022) | Yes | Yes | Can't tell | Can't tell | Can't tell | 40% | Possible social desirability bias; village sampling imbalance by tribe; unclear follow-up rates; generalizability limited to rural Niger |
| Flanagan et al. (2021) | Yes | Yes | Yes | Can't tell | Can't tell | 60% | COVID-19 disruptions; routine data did not record counseling-only visits; card redemption under-reported; no reporting of adherence |
| Gichangi et al. (2022) | Yes | Yes | Yes | No | Yes | 80% | Limited generalizability, short follow-up period, potential exposure misclassification, self-reported outcomes, lack of blinding |
| Hegdahl et al. (2022) | Yes | Yes | Yes | No | Can't tell | 60% | No measure of fidelity or exposure, possible peer influence bias, lack of blinding |
| Hinson et al. (2023) | Yes | Yes | Yes | Can't tell | Yes | 80% | Short follow-up; limited outcome scope (attitudes/intentions, not behaviors); some implementation delays due to COVID-19; unclear if there was blinding |
| Macharia et al. (2022) | Yes | Yes | No | No | No | 40% | No blinding, low adherence (55%) and only partially measured, self-reported outcomes, short follow-up |
| Nuwamanya et al. (2020) | Yes | Yes | No | Yes | Can't tell | 60% | Limited generalizability to non-university youth, possible reporting bias, no reporting of app usage or exposure, over 20% LTF with no mention on if those LTF are different than study sample or imputation |
| Rosenberg et al. (2018) | Partial | No | Yes | Can't tell | Partial | 40% | Randomization not clearly described, clinic selection not clearly described, low generalizability, service data may not reflect behavior and fidelity of intervention, no blinding |
| Silverman et al. (2023) | Yes | Yes | Yes | No | Can't tell | 60% | Self-reported data may introduce bias; generalizability limited to rural settings; not blinded, no reporting of adherence/intervention exposure/fidelity |
| Wondimagegene et al. (2023) | Yes | Partial | Yes | Yes | Partial | 80% | Reliance on self-report, short follow-up, not reported how many did not achieve 80% adherence, some differences in contraceptive use at baseline between groups |
| ***Quantitative non-randomized*** | *Are the participants representative of the target population?* | *Are measurements appropriate regarding both the outcome and intervention (or exposure)?* | *Are there complete outcome data?* | *Are the confounders accounted for in the design and analysis?* | *During the study period, is the intervention administered (or exposure occurred) as intended?* |  |  |
| Ahmed et al. (2020) | Yes | Yes | Yes | Yes | Can't tell | 80% | Cross-sectional; secondary data; lack of temporality; possible unmeasured confounding; no reporting of missing data. |
| Bajoga et al. (2015) | Yes | Yes | Can't tell | Yes | Can't tell | 60% | Cross-sectional; secondary data; lack of temporality; likely unmeasured and unadjusted confounding; no reporting of missing data. |
| Bhushan et al. (2022) | No | Yes | Can't tell | Yes | Yes | 60% | Not randomized; limited generalizability; communication outcome not stratified by method; potential selection bias; did not report on missing data; used convenience sampling |
| Borovac-Pinheiro et al. (2019) | Yes | Partial | Yes | No | Can't tell | 50% | No randomization, unclear implementation fidelity, limited confounder adjustment, historical control, unclear outcome measurement |
| Brooks et al. (2019) | Yes | Yes | Yes | Yes | Can't tell | 80% | Cross-sectional design limits causal inference; potential for selection bias in who interacted with CHWs |
| Calhoun et al. (2023) | Yes | Yes | No | Yes | Yes | 80% | Observational; exposure not standardized; possible recall bias; not randomized; significant loss-to-follow-up at 1-year follow-up and no adjustment for selection biases/missing data |
| Do et al. (2020) | Yes | Yes | Yes | Yes | Can't tell | 80% | Cross-sectional; no time-order; self-reported exposure; no measurement of discussion content; no reporting of main effect or decomposition of effects |
| Erulkar and Tamrat (2014) | Yes | Partial | Yes | Partial | No | 60% | No randomized assignment; potential selection bias; limited reporting on fidelity; limited adjustment for confounders |
| Fikree et al. (2017) | Yes | Yes | Can't tell | No | Can't tell | 40% | Non-randomized; facility-level data; possible secular trends; unable to control for client self-selection; used non-randomized sub-sample of clients; receipt of intervention not measured; no adjustment for potential confounders |
| Fikree et al. (2018) | Yes | Yes | Can't tell | No | Can't tell | 40% | Non-randomized; facility-level data; possible secular trends; unable to control for client self-selection; used non-randomized sub-sample of clients; receipt of intervention not measured; no adjustment for potential confounders |
| Gage et al. (2023) | Can't tell | Yes | Yes | Yes | Partial | 70% | Non-randomized zones; possible social desirability bias; intervention not blinded |
| Gage et al. (2023) | Can't tell | Yes | Yes | Yes | Partial | 70% | Non-randomized zones; possible social desirability bias; intervention not blinded |
| Gayles et al. (2023) | Yes | Yes | Yes | Partial | Yes | 90% | Self-report measures, not adjusted for potential confounders |
| Geugten et al. (2015) | Can't tell | Yes | Yes | No | Can't tell | 40% | No information on attrition; unclear intervention fidelity; short follow-up; no control group; not clear sampling procedure; no control for potential confounders |
| Huda et al. (2019) | Yes | Can't tell | Yes | Yes | Can't tell | 60% | No baseline (post-test only), selection bias (voluntary club attendance), self-reporting bias, limited attendance data, measures not reported clearly, adherence not reported clearly |
| Jacobs et al. (2017) | Yes | Yes | Yes | Yes | Can't tell | 80% | Cross-sectional design, observational comparison group - no randomization, self-reported outcomes |
| Jonas et al. (2022) | Yes | Yes | No | Yes | Can't tell | 60% | Cross-sectional design limits causal inference; reliance on self-report; potential unmeasured confounding |
| Kabir et al. (2015) | Yes | Can't tell | Yes | No | Can't tell | 40% | Limited detail on sampling and exposure fidelity; no control for confounders; only self-reported knowledge; no behavioral outcomes |
| Klinger and Asgary (2016) | No | Yes | No | No | Can't tell | 20% | No control group, self-reported outcomes, unclear long-term retention or behavior change; no reporting of exposure; extensive missing data; no adjustment for potential confounders |
| Makenzius et al. (2023) | Yes | Yes | No | No | Can't tell | 40% | Single intervention school, non-random assignment, high attrition at 12 months, no confounder controls, no measurement of exposure |
| Morgan et al. (2020) | Yes | Can't tell | Yes | Yes | Can't tell | 60% | Non-random assignment, self-reported outcomes, no recording of exposure, measures not clearly reported |
| Mutea et al. (2023) | Yes | Yes | Yes | Yes | Can't tell | 80% | Potential recall and social desirability bias, lack of individual-level panel data, exposure to intervention not reported by endline group |
| Oberth et al. (2021) | Yes | Can't tell | Yes | No | Partial | 50% | Self-reported data subject to social desirability bias; no tracking of actual session attendance or dose; cross-sectional measurement limits causal inference |
| Renzaho et al. (2022) | Partial | Partial | Yes | Yes | Can't tell | 60% | Purposive selection with unclear inclusion criteria, limited/no reporting on intervention adherence, self-reported outcomes, measures single item measures (not validated), many different single item measures make multiple comparisons bias likely |
| Shakya et al. (2020) | Yes | Yes | Yes | Yes | Can't tell | 80% | Cross-sectional design limits causal inference; self-reported contraceptive use |
| Thakuri et al. (2023) | Yes | Yes | Partial | No | Can't tell | 50% | No control group; self-reported outcomes; short follow-up duration; large LTF and missing data; sample size for FP outcomes is small; no reporting on exposure |
| ***Mixed methods*** | *Is there an adequate rationale for using a mixed methods design to address the research question?* | *Are the different components of the study effectively integrated to answer the research question?* | *Are the outputs of the integration of qualitative and quantitative components adequately interpreted?* | *Are divergences and inconsistencies between quantitative and qualitative results adequately addressed?* | *Do the different components of the study adhere to the quality criteria of each tradition of the methods involved?* |  |  |
| Bhandari et al. (2023) | Yes | Partial | Partial | Partial | Partial | 60% | No control group; attrition; selection bias; self-report; limited integration and explanation of integration; limited understanding of adherence/exposure |
| Fikree et al. (2020) | No | Yes | Yes | Yes | No | 60% | No control group, limited generalizability, staff turnover, limited budget support, commodity stockouts, retrospective design |

**Supplement 3. Effects of Intervention Strategies on Secondary Contraceptive-Related Outcomes**

| **Study (Name, Year)** | **Main findings** | **Contraceptive Outcome(s)** | **Estimate [effect measure, estimate (95% CI or std error)]** | **Significance at p<.05** | **Intervention Name** | **Intervention strategies** B |
| --- | --- | --- | --- | --- | --- | --- |
| **Contraceptive Method Type** | |  |  |  |  |  |
| Calhoun et al., 2023 | For each counseling session where FP was discussed, women had greater likelihood of taking a LARC vs. a traditional method, no method, or a short acting method and a greater likelihood of taking a short acting method vs. a traditional method or no method. | Type of contraception used | LARCs vs. traditional: aRRR 2.25 (0.4) Short acting vs. traditional: aRRR 1.47 (0.2) LARCs vs. short acting: aRRR 1.53 (0.2) | Significant (p<.0001) Significant (p<.001) Significant (p<.0001) | Integrated FP counseling in ANC/PNC strategy | Integrated service delivery Quality of care improvements |
| Gage et al., 2023 [2] | The MOMENTUM multi-component intervention increased women's use of contraceptive implants over other methods compared to controls. | Use of contraceptive implant vs. other modern method | aRD 0.16 (0.10-0.20) | Significant (p<.001) | MOMENTUM | Couple communication Engaging men and boys Extension worker Interpersonal communication Small-group education Social norms & networks |
| Erhardt-Ohren et al., 2022 | Married adolescent girls receiving home visits, either in the home visit arm or the combined intervention arm, were more likely than control to have a sustained effect using LARCs 18-months post intervention; the small group only arm saw no effect. | Current LARC use | Home visits vs. control: aOR 8.09 (2.87–22.77) Small group discussion vs. control: aOR 1.35 (0.49–3.74) Combined intervention vs. control: aOR 7.98 (2.92–21.84) | Significant (p<.001) Null  Significant (p<.001) | Reaching Married Adolescents (RMA) | Couple communication Engaging men and boys Extension worker Small-group education Social norms & networks |
| Fikree et al., 2017 | Intervention facilities receiving an adolescent friendly service package were more likely to report increased uptake of LARCs in the post-intervention period compared to controls. | Uptake of LARCs vs. short-acting methods (facility level) | aOR 1.3 (CI or stderr not reported) | Significant (p<.0001) | LARCs & Youth Project | Adolescent-responsive services Peer-led approaches |
| Fikree et al., 2020 | Only two of the eight intervention facilities had a greater number of LARC acceptors pre to post-intervention. | Proportion of new users accepting LARCs | Facility 1: +0.9 pp  Facility 2: +4.0 pp Facility 3: -7.3 pp Facility 4: +13.6 pp Facility 5: -9.2 pp Facility 6: +2.2 pp Facility 7: -4.6 pp Facility 8: +18.6 pp | Null Null Null Significant (p<.05) Null Null Null Significant (p<.05) | LARCs & Youth Project | Adolescent-responsive services Peer-led approaches |
| Borovac-Pinheiro et al., 2019 | Girls delivering during the program had increased uptake of IUD and other methods but decreased uptake of DMPA compared to girls delivering before the program began. | Uptake of IUD Uptake of DMPA Uptake of other method | IUD: + 26% (CI or stderr not reported) DMPA: -37% (CI or stderr not reported) Other: +16% (CI or stderr not reported) | Not reported | Unnamed PNC counseling for adolescents intervention | Adolescent-responsive services Integrated service delivery |
| Rosenberg et al., 2018 | Youth in intervention conditions had greater dual method uptake than controls. | Uptake of dual methods (service card) | 33% (29-36%) | Not reported | Girl Power Malawi | Adolescent-responsive services Couple communication Financial incentives Small-group education |
| Jonas et al., 2022 | Those who participated in the HERStory intervention were more likely to have used dual methods compared to non-participants. | Use of dual contraceptive methods at last sex | aPR 1.45 (1.26-1.68) | Significant (p<.001) | HERStory | Peer-led approaches School-based education Small-group education Supply Other |
| **Contraceptive Unmet Need / Demand / Intention** | | | | | | |
| Hinson et al., 2023 | Girls in the intervention group had a marginally significant increase in intention to use contraceptives at endline compared to controls; this was driven primarily by sub-groups of girls who had visited the health facility and who had never had sex. | Intention to use contraception within 3 months | aOR: 1.59 (0.97-2.61) | Marginally significant (p<.1) | (re)solve intervention | Adolescent-responsive services  School-based education |
| Wondimagegene et al., 2023 | Girls at intervention schools had greater unmet need for contraceptives and greater contraceptive demand over time relative to controls. | Unmet need for contraceptives Contraceptive demand | Unmet need: aOR 6.37 (1.61-24.36) Demand: aOR 6.06 (2.43-15.11) | Significant (p=.01) | Unnamed school-based peer education intervention | Peer-led approaches School-based education |
| Jacobs et al., 2017 | Young women exposed to FP messages in the media was associated with significantly greater intention use to use contraceptives in Senegal and Burkina Faso. | Intention to use contraception in the future | Burkina Faso: aOR 1.74 (1.22-2.49) Senegal: aOR 1.74 (0.92-3.28) | Significant (p=0.002) Marginally significant (p=0.09) | Mass media strategy | Mass media |
| Morgan et al., 2020 | First-time mothers and partners intention to space births increased significantly from pre to post-intervention. | Birth spacing intentions | First time mothers: +64.80% (CI or stderr not reported) Male partners: +48.70% (CI or stderr not reported) | Significant (p<.001) Significant (p<.001) | Unnamed first-time parent intervention | Couple communication  Engaging men and boys Extension workers Interpersonal communication  Small-group education Social norms & networks Other |
| **Contraceptive Knowledge, Self-efficacy/Agency, and Attitudes Outcomes** | | | | | | |
| Austrian et al., 2021 | Participants in the intervention group combining violence prevention plus education plus health and plus wealth in Kibera had greater knowledge of modern contraceptive methods at endline than those receiving violence prevention only. But in Wajir, participants in all intervention groups had lower knowledge of modern contraception at endline compared to controls. In Kibera, those receiving violence prevention plus education plus health and plus wealth had greater condom self-efficacy at endline than those receiving violence prevention only. | Knows method of modern contraception Condom self-efficacy | Knowledge - Violence prevention + education (Kibera): aRD -.0007 (-.06-0.05) Knowledge - Violence prevention + education + health (Kibera): aRD 0.13 (0.07-0.19) Knowledge - Violence prevention + education + health + wealth (Kibera): aRD 0.12 (0.06-0.18) Knowledge - Violence prevention + education (Wajir): aRD -.1 (−0.21 - 0.02) Knowledge - Violence prevention + education + health (Wajir): aRD -.1 (−0.19- − 0.01) Knowledge - Violence prevention + education + health + wealth (Wajir): aRD -.1 (−0.20 - 0.01) Condom self-efficacy - violence prevention + education (Kibera): aRD 0.04 (-0.10-0.17) Condom self-efficacy - violence prevention + education + health (Kibera): aRD 0.18 (0.05-0.30) Condom self-efficacy - violence prevention + education + health + wealth (Kibera): aRD 0.12 (-0.01-0.25) | Significant (p<.05) Significant (p<.05) Significant (p<.05) Marginally significant (p<.1) Significant (p<.05) Marginally significant (p<.1) Null (n>.1) Significant (p<.05) Marginally significant (p<.1) | Adolescent Girls Initiative - Kenya (AGI-K) | Empowerment components  Financial incentives  Small-group education |
| Renzaho et al., 2022 | Youth in the multi-component intervention group had an increase in knowledge of where to get help with FP and abortion over time relative to controls. | Aware of place to get family planning Have someone or somewhere to go for help with abortion questions Can make decisions about when and whether to have children without fear | Aware of FP service point: % difference 15.1% (4.7) Aware of abortion help: % difference 15.4% (7.8) Can make decisions without fear: % difference 5.3 (4.7) | Significant (p=0.001) Significant (p=.05) Null | UPLIFT | Empowerment components Engaging men and boys Interpersonal communication Peer-led approaches Small-group education |
| Gichangi et al., 2022 | Those receiving intervention messages had no difference in relative change over time in the contraception myths and misconceptions endorsed compared to control. | Contraception myths and misconceptions endorsed | Intervention vs control: PD 0.20% ('8.3% - 8.7%) * Contact vs. control: PD -3.10% (-11.7%- 5.4%) * Intervention vs. contact: PD 3.30% (-5.1%- 11.8%) * | Null Null Null | ARMADILLO SMS initiative | Digital technology |
| Macharia et al., 2022 | Adolescents receiving USSD-messages through the mobile app showed improved SRH knowledge and marginally improved contraceptive knowledge. | Contraceptive knowledge score SRH knowledge score | Contraceptive knowledge: mean diff 0.36 (0.06-0.65) SRH knowledge: mean diff 0.50 (0.10-0.90) | Marginally significant (p<.1) Significant (p<.05) | Unnamed mobile USSD application | Digital technology |
| Nuwamanya et al., 2020 | Students receiving the USSD-messages showed increased use in contraception over time relative to controls. | SRH knowledge | beta 0.98 (0.29-1.46) * | Significant (p<.05) | Unnamed mobile application | Digital technology |
| Gage et al., 2023 [1] | The MOMENTUM multi-component intervention increased women's knowledge of modern FP methods and decreased the number of FP myths women endorsed. | Number of modern methods known Number of FP myths endorsed Approval of FP | Mean difference # of methods known: 0.58 (0.35-0.81) Mean difference # of myths endorsed: -0.85 (-1.15-0.54) aRD 0.10 (0.05-0.15)* | Significant (p<.05) Significant (p<.05) Significant (p<.01) | MOMENTUM | Couple communication Engaging men and boys Extension worker Interpersonal communication Small-group education Social norms & networks |
| Morgan et al., 2020 | First-time mothers and partners knowledge of contraception increased significantly from pre to post-intervention. | Awareness of at least 3 contraceptive methods | First time mothers: +43.50% (CI or stderr not reported) Male partners: +37.50% (CI or stderr not reported) | Significant (p<.001) Significant (p<.001) | Unnamed first-time parent intervention | Couple communication  Engaging men and boys Extension workers Interpersonal communication  Small-group education Social norms & networks Other |
| Gayles et al., 2023 | The Growing Up GREAT intervention increased pregnancy knowledge among in school very young adolescents and increased awareness of where to get contraception among very young adolescents out of school. | Pregnancy knowledge score Knows where to get contraception | Mean difference pregnancy knowledge score (in school): 0.48 (0.18-0.77) Mean difference pregnancy knowledge score (out of school): 0.12 (-0.42-0.66) aOR aware of where to get contraception (in school): 1.47 (0.94-2.30) aOR aware of where to get contraception (out of school): 2.59 (1.26-5.32) | Significant (p<.05) Null Null Significant | Growing up GREAT! | Engaging men and boys Peer-led approaches School-based education Small-group education Social norms & networks |
| Mutea et al., 2023 | Adolescents in the intervention group receiving adolescent friendly services had no increase in knowledge of contraception over time relative to controls. | Knowledge of contraception | IRR: 1.16 (0.96–1.41) * | Null | Afya Halisi | Adolescent-responsive services Interpersonal communication Peer-led approaches |
| Thakuri et al., 2023 | Participants reported an increase in knowledge of where to get a contraceptive method from pre to post intervention. | Knows where to get contraception | % change + 7% (CI or stderr not reported) | Significant (p<.05) | Healthy Transitions for Nepali Youth | Adolescent-responsive services Engaging men and boys Extension worker Small-group education Social norms & networks |
| Huda et al., 2019 | Those assigned to receive the small group education sessions were more likely to be aware of contraceptive methods and supportive of using contraceptives post-intervention compared to controls. | Aware of modern methods of contraception Consequences of early pregnancy properly identified Supports using FP | aOR 15.26 (CI or stderr not reported) aOR 3.41 (CI or stderr not reported) aOR 6.55 (CI or stderr not reported) | Significant (p<.001) Significant (p<.001) Significant (p<.001) | Married Adolescent Girl (MAG) club | Small-group education |
| Makenzius et al., 2023 | Students at intervention schools had reduced stigmatizing attitudes towards contraception over time relative to control. | Adolescents Stigmatizing Attitudes, Beliefs and Actions (ASABA) Contraceptive Use Stigma (CUS) | ASABA: -0.78 (-0.85- -0.71) CUS: -0.73 (-0.83- -0.63) | Significant (p<.001) Significant (p<.001) | Unnamed school stigma reducation intervention | Engaging men and boys Peer-led approaches School-based education |
| Hegdahl et al., 2022 | Those allocated to receive cash transfers only had no difference in contraceptive knowledge at endline while those allocated to receive cash transfers combined with comprehensive sex education and community dialogues saw a marginally significant increase good knowledge of modern contraception at endline. | Good knowledge of modern contraceptive methods | Economic vs. control: aRR 0.99 (0.80-1.22) Combined vs. control: aRR 1.16 (0.94-1.43) | Null Marginally significant (p<.1) | Unnamed multi-level intervention involving economic support and comprehensive sex education | Financial incentives School-based education Small-group education Social norms & networks |
| Geugten et al., 2015 | Participants increased their overall knowledge of SRHR from pre to post intervention. | SRH knowledge score | Mean diff 1.17 (CI or stderr not reported) | Significant (p<.05) | Unnamed comprehensive sex education intervention | School-based education |
| Kabir et al., 2015 | Girls participating in the intervention had no increase in their knowledge of contraception from pre to post intervention. | Knew about contraceptive methods | Urban Dhaka slums: +1% (CI or stderr not reported) Rural Nabigangi: -3% (CI or stderr not reported) | Null Null | Unnamed peer-education intervention for unmarried girls | Small-group education Social norms & networks |
| Klinger and Asgary, 2016 | Participants had no increase in attitudes approving of contraception or self-efficacy to use contraception from pre to post intervention. | Attitudes regarding contraception Self-efficacy regarding contraception | Attitudes: Mean diff +0.03 (CI or stderr not reported) Self-efficacy: Mean diff +0.63 (CI or stderr not reported) | Null Null | Unnamed SRHR curriculum intervention | School-based education Extension worker |
| Alekhya et al., 2023 | Those in the intervention group increased their awareness of contraceptive methods compared to those in the control group. | Awareness of contraceptive methods | Intervention: +73.9 pp Control: -5.9 pp | Significant (p<.05) | Unnamed school-based SRHR education intervention | School-based education |
| Arinze-Onyia et al., 2014 | Those who received emergency contraceptives increased knowledge of emergency contraceptive methods from baseline to follow-up, compared to control. | Contraceptive knowledge score | Intervention: +44.7 pp Control: +17.9 pp | Significant (p<.05) | Unnamed provision of EC intervention | Supply |
| Jacobs et al., 2017 | Young women exposed to FP messages in the media was associated with greater knowledge of a modern method in both Senegal and Burkina Faso. | Knowledge of a modern contraceptive method | Burkina Faso: aOR 13.66 (3.72-50.13) Senegal: aOR 6.72 (2.55-17.65) | Significant (p<.001) Significant (p<.001) | Mass media strategy | Mass media |
| **Contraceptive Norms, Approval, and Communication Outcomes** | | | | | | |
| Gage et al., 2023 [1] | The MOMENTUM multi-component intervention increased women's approval of FP and perceived injunctive and descriptive norms supporting postpartum FP use. | Perceived significant others believe she ought to discuss postpartum FP with her male partner Perceived significant others believe she ought to use postpartum FP Believed most first-time young mothers discuss postpartum FP with male partner before baby's birth Believed most first-time young mothers use postpartum FP Perceived community members will say good things about women who use postpartum FP Ever discussed FP use in early postpartum with male partner Discussed FP use with health worker in early postpartum Discussed FP use with partner after delivery | aRD 0.09 (0.04-0.14)* aRD 0.05 (0.01-0.1)* aRD 0.03 (-0.01-0.07)* aRD 0.08 (0.04-012)* aRD 0.15 (0.10-0.21)* aRD 0.05 (0.01-0.10)* aRD 0.23 (0.19-0.28)* aRD 0.09 (0.04-0.14)* | Significant (p<.05) Marginally significant (p=0.06) Null (p>.1) Significant (p<.01) Significant (p<.05) Significant (p<.05) Significant (p<.05) Significant (p<.05) | MOMENTUM | Couple communication Engaging men and boys Extension worker Interpersonal communication Small-group education Social norms & networks |
| Huda et al., 2019 | Those assigned to receive the small group education sessions were more likely to report that their husband supports them using family planning post-intervention compared to controls. | Husband supports using FP Discussed FP with husband | aOR: 3.96 (CI or stderr not reported) aOR: 7.45 (CI or stderr not reported) | Significant (p<.0001) Significant (p<.0001) | Married Adolescent Girl (MAG) club | Small-group education |
| Bhandari et al., 2023 | Married girls participating in the intervention reported increased perceived community, family, and provider support to both delay first pregnancies and space births. | Perceived community support to delay first pregnancies Perceived community support to space births Perceived family support to delay first pregnancies Perceived family support to space births Perceived provider support to delay first pregnancies Perceived provider support to space births | Community delay pregnancy: +22% (CI or stderr not reported) Community space birth: +20% (CI or stderr not reported) Family delay pregnancy: +32% (CI or stderr not reported) Family space birth: +33% (CI or stderr not reported) Provider delay pregnancy: +15% (CI or stderr not reported) Provider space birth: +9% (CI or stderr not reported) | Significant (p<.001) Significant (p<.001) Significant (p<.001) Significant (p<.001) Significant (p<.001) Significant (p<.001) | Healthy Transitions for Nepali Youth | Adolescent-responsive services Engaging men and boys Extension worker Small-group education Social norms & networks |
| Morgan et al., 2020 | First-time mothers and partners perceptions of spousal approval of FP and discussion of FP with their partner increased significantly from pre to post-intervention. | Spousal approval of FP Discussion of FP with partner | Spousal approval - First time mothers: +12.70% (CI or stderr not reported) Spousal approval - Male partners: +5.90% (CI or stderr not reported) Partner discussion - First time mothers: +39.00% (CI or stderr not reported) Partner discussion - Male partners: +22.00% (CI or stderr not reported) | Significant (p<.001) Significant (p<.001) | Unnamed first-time parent intervention | Couple communication  Engaging men and boys Extension workers Interpersonal communication  Small-group education Social norms & networks Other |
| **Service Outcomes** | | | | | | |
| Gage et al., 2023 [1] | The MOMENTUM multi-component intervention increased women's reporting visits to health facilities to obtain FP early in the postpartum period. | Went to a health facility to obtain contraception early in postpartum period | aRD 0.13 (0.09-0.17) | Significant (p<.01) | MOMENTUM | Couple communication Engaging men and boys Extension worker Interpersonal communication Small-group education Social norms & networks |
| Gage et al., 2023 [2] | The MOMENTUM multi-component intervention increased women's use informed choice during counseling, obtaining an FP method from a CHW and receiving FP counseling from a CHW. | Informed choice during counseling Obtained current method from CHW Received FP counseling from CHW | aRD 0.14 (0.07-0.20) aRD 0.29 (0.24-0.34) aRD 0.53 (0.48-0.58) | Significant (p<.001) Significant (p<.001) Significant (p<.001) | MOMENTUM | Couple communication Engaging men and boys Extension worker Interpersonal communication Small-group education Social norms & networks |
| Fikree et al., 2018 | Intervention facilities receiving an adolescent friendly service package were more likely to refer men for FP in the post-intervention period compared to controls, but there was no difference for referrals among females for any method or LARCs. | Referral (facility level) | Male FP referrals: aOR 1.4 (CI or stderr not reported) Female FP referrals: aOR 0.75 (CI or stderr not reported) Female LARC referrals: aOR 0.83 (CI or stderr not reported) | Significant (p<.05) Null Null | LARCs & Youth Project | Adolescent-responsive services Peer-led approaches |
| Flanagan et al., 2021 | Intervention health centers with peer-referral voucher cards and youth friendly clinic materials on average increased adolescent FP visits but this change was driven by intervention health centers receiving the Core-plus intervention which also included an additional component of provider training on youth friendly contraceptive services. | Number of visits for FP services by adolescents (facility level) | Average intervention effect: aIRR 1.45 (1.14-1.85) Core intervention effect: aIRR 1.26 (0.97-1.65) Core-plus intervention effect: aIRR 1.62 (1.21-2.17) | Significant (p<.05) Null Significant (p<.05) | MSI peer-referral and clinic welcome intervention | Adolescent-responsive services Financial incentives  Peer-led approaches |
| Mutea et al., 2023 | Adolescents in the intervention group receiving adolescent friendly services had no increase in comfort to seek FP service over time relative to controls. | Comfortable seeking FP service | IRR: 1.19 (0.95–1.49) * | Null | Afya Halisi | Adolescent-responsive services Interpersonal communication Peer-led approaches |
| Renzaho et al. (2022) | Youth in the multi-component intervention group had an increase in visiting a health facility to get information on FP and STDs over time relative to controls. | Visited a health facility to get information on FP and STDs past year | % difference 13.5% (7.9) | Marginally significant (p=0.07) | UPLIFT | Empowerment components Engaging men and boys Interpersonal communication Peer-led approaches Small-group education |
| A Combination score including both strength of study design and study quality from MMAT score. High confidence included findings from a strong study or moderate design, with a clear outcome, a MMAT >=60% and no major flaws. Moderate confidence included mid-quality moderate strength study design or a strong study design with MMAT 40-59%. Low confidence included findings from a weak study design or those with MMAT <40%, or small N. B Strategies classified to align with foundation strategy, defined in Supplemental file 2. ^ Some studies are not included in this table because they did not report on an outcome other than contraceptive use or uptake, which are reported in Table 4. * Represents a DID analysis | | | | | | |
